# Supplementary material for: Modified Early Warning Score (MEWS) combined with biomarkers in predicting 7-day mortality in traumatic brain injury patients in the emergency department: a retrospective cohort study
Source: PeerJ journal article supplement (doi:10.7717/peerj.18936), 2025-02-13
Supplement: 4_data.xlsx [file 4_data.xlsx]

## Sheet: data1010
X1	X2	X3	X4	X5	X6	X7	X8	X9	X10	X11	X12	X13	X14	X15	X16	X17	X18	X19	X20	X21	X22
1	0	6	36	79	162	66	98	25	92	2	2	15.2	3.9	245	12.3	13.6	4.3	1.3	6	0	0
2	0	4	37.6	86	116	85	95.3333	20	97	1	13	21.5	3.92	357	10.9	17.3	4	1.5	2	2	0
3	0	2	36.7	100	120	74	89.3333	21	99	2	2	8.5	5.23	239	12.6	8.7	4	1	2	2	0
4	1	1	37.6	86	130	61	84	19	95	1	0	9.6	4.76	228	14.5	3	4.2	0.9	2	0	0
5	0	4	37.6	72	135	91	105.667	20	100	1	0	9.5	3.36	189	11.1	14.5	2.9	0.5	2	1	0
6	1	3	37.3	76	127	82	97	20	100	1	13	16.4	4.86	218	15.2	13.5	3.2	1.1	5	0	0
7	0	1	37.3	92	135	73	93.6667	18	100	1	0	5.5	2.66	223	8.2	5	3.8	0.5	3	0	0
8	0	1	36.2	82	126	82	96.6667	16	100	1	0	6	5.15	179	15.9	6	3.7	1.2	3	0	0
9	0	4	35.4	50	155	69	97.6667	17	100	2	13	9.5	4.68	142	14	13.5	4.2	0.9	3	4	0
10	0	2	38	73	150	93	112	18	99	1	0	10.2	5.21	276	14.1	6	4.7	0.8	2	0	0
11	0	1	37	84	144	100	114.667	17	90	1	0	11.1	3.03	315	8.8	15.7	4	1.7	2	0	0
12	0	5	36.8	91	167	108	127.667	17	95	1	0	8.8	4.72	171	14.4	12.5	4	0.8	3	2	0
13	1	0	37.1	82	132	78	96	14	100	0	5	7.8	4.19	243	10.2	6	3.7	1.2	3	2	0
14	0	3	36	125	150	71	97.3333	20	89	3	20	20.9	4.52	323	13.8	13.5	4.6	1.1	3	1	0
15	0	3	36	125	150	86	107.333	20	89	3	0	7.3	4.29	246	11.5	8	3.1	1.2	2	2	0
16	0	2	37.1	94	125	72	89.6667	20	100	1	0	9.8	3.29	170	9.9	14	4	1.9	3	2	0
17	0	4	37	107	165	106	125.667	29	99	4	0	14.5	4.46	351	9.6	13.4	4.4	5.8	2	5	1
18	0	2	37.6	74	145	93	110.333	28	98	2	23	14.4	4.26	307	13.1	12.2	3.7	0.7	2	0	0
19	0	1	37.2	107	130	64	86	29	97	3	0	5.4	3.03	107	9.6	14.5	5	8.8	6	2	0
20	0	0	36.9	86	151	97	115	21	100	2	0	21.8	4.38	235	15.1	13.7	5.5	6.3	3	0	0
21	1	2	37.2	81	135	84	101	16	100	1	13	12.1	4.16	258	11.3	15.3	5.1	1.3	6	0	0
22	0	2	37.8	80	123	84	97	20	100	1	1	6.3	2.62	94	7.9	8	3.8	3.1	2	5	0
23	0	2	36	70	158	109	125.333	12	100	1	14	12.2	3.39	248	10.6	6	5	1.2	3	0	0
24	1	5	37.9	106	130	76	94	25	96	3	0	18.4	2.66	335	6.1	16.3	4.6	1.3	4	0	0
25	1	2	37.1	78	135	79	97.6667	18	97	1	18	22.5	2.87	20	7	17.3	3.9	1.4	2	2	0
26	0	1	36.7	91	113	68	83	21	98	2	4	5.4	4.13	122	11.9	5	4.1	0.7	2	0	0
27	0	5	38	75	144	95	111.333	20	100	1	3	7.1	3.23	257	10.5	13.5	3.5	1.1	2	1	0
28	0	1	36.6	78	113	69	83.6667	15	98	1	11	10.8	3.97	164	11.3	14.2	3.5	0.9	6	0	0
29	0	2	37.3	77	132	84	100	16	99	1	11	6.5	4.2	227	13.1	13.9	5	0.7	3	2	0
30	1	7	36.2	83	112	83	92.6667	15	98	1	0	14.7	4.1	279	13	11.9	4.2	1	2	2	0
31	1	4	35.9	139	105	90	95	0	100	8	0	8.3	2.81	240	8.4	14.1	4.4	1.2	2	1	0
32	0	4	36.5	85	161	82	108.333	19	98	3	24	26.5	4.3	276	11.7	12.8	3.8	1	6	5	0
33	0	2	38.1	68	103	54	70.3333	12	92	0	0	9.7	2.69	87	9.6	17.2	3.3	1.5	6	1	0
34	0	3	37.3	98	119	93	101.667	26	99	2	0	4.2	3.99	450	12	14.7	3.8	8	2	1	0
35	0	6	36.7	121	161	129	139.667	10	80	5	2	9.6	2	174	6	14.1	5.5	5.9	2	1	1
36	1	6	37.2	93	156	69	98	17	100	1	0	15.5	4.77	301	12.1	16.6	4.6	0.7	2	5	0
37	0	3	37	95	148	90	109.333	20	99	1	2	15.1	2.97	180	9	18.8	3.8	0.7	2	0	0
38	0	3	37.2	101	173	94	120.333	20	98	2	0	15	3.94	224	11.1	14.7	5.1	3.4	2	1	0
39	0	4	36.6	61	134	96	108.667	16	100	1	0	8.5	4.64	186	13.9	14	4	1.4	5	1	0
40	1	5	37	85	180	98	125.333	20	96	1	0	13.6	4.86	161	14.3	13.6	4.1	1	6	0	0
41	0	4	36.1	75	188	98	128	22	94	3	1	9	4.13	406	11.2	17.1	4.8	1.3	2	0	0
42	0	5	38.2	79	115	56	75.6667	23	95	2	9	1.4	3.45	102	11.1	15.4	4.4	2.7	6	0	0
43	0	3	37.2	86	134	84	100.667	9	98	0	22	18.3	3.93	162	11.4	15.9	3.7	4.2	6	4	0
44	1	4	36.4	78	138	84	102	20	98	1	0	22	3.99	274	12.3	13.1	4.5	2.7	5	1	0
45	0	5	37.1	108	150	90	110	20	100	2	23	13.9	4.12	162	11.8	12.4	3.7	0.8	2	0	0
46	0	5	37.1	108	151	90	110.333	20	100	2	3	20.7	2.97	260	9.7	8	3.7	1.6	3	0	0
47	0	4	36.8	105	165	95	118.333	44	93	4	0	7.1	3.12	123	9.1	14.4	3.9	0.8	6	1	0
48	0	4	35.6	63	116	71	86	22	100	3	3	12.6	3.65	158	9.7	7	4.8	1.2	2	0	0
49	0	3	36.3	59	136	99	111.333	20	100	1	0	10.9	3.37	107	10.3	15.4	4.3	1.1	3	0	0
50	0	5	36.8	55	155	96	115.667	18	100	1	3	7.1	3.86	575	10.7	8	4.9	1	3	1	0
51	1	3	36.9	82	122	83	96	18	98	1	1	16.2	3.52	162	10.3	12.6	4.5	0.7	2	0	0
52	0	4	36.9	97	114	87	96	13	100	0	0	12.1	5.64	153	16.2	13.4	3.8	1.2	3	5	0
53	0	4	36.7	89	151	103	119	15	98	1	3	14.6	4.1	354	12.4	13.3	4.5	1.4	2	1	0
54	0	7	37.7	110	155	95	115	15	100	2	0	7.8	3.71	353	9.3	3	4	0.9	2	5	0
55	0	3	36	83	110	67	81.3333	16	100	1	2	23.3	4.53	357	13.6	13.4	2.7	0.6	1	1	0
56	0	7	37.3	68	176	61	99.3333	17	99	1	3	13	4.65	186	13.5	12.5	4	1.5	3	2	0
57	0	3	36.8	64	131	86	101	18	100	1	0	21.9	3.73	164	11.6	15.5	3.4	1.5	6	1	0
58	0	3	36.8	64	131	86	101	18	100	1	9	33.3	5.07	264	16.4	12	3.8	1	3	0	0
59	1	4	36.3	75	137	91	106.333	17	100	1	23	11.5	3.67	176	10.1	14.1	4.4	1.4	1	1	0
60	0	5	36.2	76	170	100	123.333	20	95	3	0	15.9	4.23	324	10.3	8	3.6	1	1	1	0
61	0	4	35.3	72	124	74	90.6667	28	91	4	0	29.2	4.29	195	12.6	8	4.6	1.5	6	1	0
62	1	3	37.5	100	120	73	88.6667	25	100	2	1	10.1	3.66	205	10.9	6	4.8	0.7	1	0	0
63	1	3	37	74	150	92	111.333	20	100	1	3	7.1	3.44	249	10.8	7	3.3	1.1	1	1	0
64	1	1	37.5	86	94	64	74	18	100	2	10	5.8	4.24	160	13.7	6	3.5	1	5	0	0
65	0	5	36.9	135	227	139	168.333	32	76	8	24	21.1	3.69	283	9.8	14.6	4.4	0.5	3	0	0
66	0	4	36.7	93	118	69	85.3333	16	98	1	0	7	4.4	223	12.6	14.9	4.3	1.5	1	0	0
67	0	1	38.2	60	151	77	101.667	22	99	7	0	17	3.57	356	8.8	17.1	4.4	5.9	4	1	0
68	1	4	36.7	65	104	74	84	20	95	1	0	12.4	4.97	363	14.6	13.4	4.2	1.1	6	0	0
69	0	5	34.4	0	0	0	0	0	0	12	0	12.3	4.24	348	12.3	13.8	3.9	1.2	1	2	0
70	0	7	36.2	117	72	51	58	15	91	5	0	8.2	4.32	285	14	13.1	4.5	0.8	6	0	0
71	1	3	38.1	80	101	72	81.6667	18	100	1	9	11.2	4.35	247	12.4	7	4.2	1.3	1	1	0
72	0	3	35.8	83	142	100	114	18	99	1	0	8.2	3.46	201	10.5	12.8	4	1.3	4	0	0
73	0	2	36.5	90	132	84	100	20	100	1	56	7.7	5.48	311	14.5	14.9	4	0.8	4	0	0
74	1	1	37.8	100	133	74	93.6667	18	98	1	23	12.2	3.98	143	13.1	13.3	4.4	1.5	6	0	0
75	0	4	36.4	92	162	98	119.333	19	99	1	0	5.9	3.92	179	11.8	12.9	5.5	1.2	6	0	0
76	0	4	37.6	75	170	78	108.667	20	96	1	0	8.4	4.54	186	14.5	12.5	4.1	1	1	1	0
77	0	5	36	75	130	81	97.3333	20	96	1	0	7	3.74	301	11.4	12.8	4.5	0.8	1	0	0
78	0	4	36	46	135	88	103.667	14	95	1	6	15.4	5.22	192	14.4	13	4.7	0.9	3	5	0
79	0	2	36.8	87	170	110	130	23	99	2	1	5.4	3.64	337	10.3	7	4	1.8	1	2	0
80	0	3	36.8	90	127	93	104.333	22	100	2	1	17.1	5.13	231	16.6	14.4	3.7	1.3	1	2	0
81	0	2	36.7	115	117	45	69	31	100	5	0	6.4	3.28	230	10	14.8	5	0.5	6	0	0
82	1	3	37.5	120	134	87	102.667	22	87	4	0	12.8		301		29	6	5.3	1	2	1
83	0	3	36.5	87	106	72	83.3333	26	95	2	21	7.5	4.3	167	13.8	14.7	4	1	6	1	0
84	1	3	36.5	94	136	83	100.667	20	95	1	4	11.5	4.55	209	13.2	13.6	4.2	1.2	1	1	0
85	0	2	36.4	98	105	83	90.3333	18	98	1	1	15.8	4.83	191	16.3	3	3.2	0.8	1	0	0
86	0	2	36.7	92	96	81	86	6	95	5	0	12.2	3.95	171	12.1	14.2	3.7	0.8	6	1	1
87	0	4	36.6	66	138	82	100.667	20	99	1	27	1.2	2.36	17	6.9	6	3.5	0.6	1	0	0
88	0	4	37	73	128	91	103.333	20	94	1	0	6.3	2.86	24	8.6	16.5	3.3	0.2	6	5	1
89	1	4	37.9	73	162	89	113.333	19	99	1	0	18.5	4.22	284	13.2	8	3.6	1.1	1	2	0
90	0	2	37.3	77	132	84	100	16	99	1	11	6.5	4.2	227	13.1	13.9	5	0.7	6	5	0
91	1	7	36.2	83	112	83	92.6667	15	98	1	0	14.7	4.1	279	13	11.9	4.2	1	1	0	0
92	1	4	35.9	139	105	90	95	0	100	8	0	8.3	2.81	240	8.4	14.1	4.4	3.2	1	0	1
93	0	4	36.5	85	161	82	108.333	19	98	3	24	26.5	4.3	276	11.7	12.8	3.8	1	6	1	0
94	0	2	38.1	68	103	54	70.3333	12	92	0	0	9.7	2.69	87	9.6	17.2	3.3	1.5	3	0	0
95	0	3	37.3	98	119	93	101.667	26	99	2	0	4.2	3.99	450	12	14.7	3.8	8	5	4	0
96	0	6	36.7	121	161	129	139.667	10	80	5	2	9.6	2	174	6	14.1	5.5	1.8	6	1	0
97	1	6	37.2	93	156	69	98	17	100	1	0	15.5	4.77	301	12.1	8	4.6	0.7	5	5	0
98	0	3	37	95	148	90	109.333	20	99	1	2	15.1	2.97	180	9	7	3.8	0.7	1	0	0
99	0	3	37.2	101	173	94	120.333	20	98	2	0	15	3.94	224	11.1	8	5.1	3.4	3	0	0
100	0	4	36.6	61	134	96	108.667	16	100	1	0	8.5	4.64	186	13.9	6	4	1.4	1	5	0
101	1	5	37	85	180	98	125.333	20	96	1	0	13.6	4.86	161	14.3	13.6	4.1	1	3	0	0
102	0	4	36.1	75	188	98	128	22	94	3	1	9	4.13	406	11.2	8	4.8	1.3	6	0	0
103	0	5	38.2	79	115	56	75.6667	23	95	2	9	1.4	3.45	102	11.1	8	4.4	2.7	1	0	0
104	0	3	37.2	86	134	84	100.667	9	98	0	22	18.3	3.93	162	11.4	7	3.7	4.2	4	0	0
105	1	4	36.4	78	138	84	102	20	98	1	0	22	3.99	274	12.3	13.1	4.5	2.7	1	1	0
106	0	5	37.1	108	150	90	110	20	100	2	23	13.9	4.12	162	11.8	12.4	3.7	0.8	6	2	0
107	0	5	37.1	108	151	90	110.333	20	100	2	3	20.7	2.97	260	9.7	8	3.7	1.6	1	4	0
108	0	4	36.8	105	165	95	118.333	44	93	4	0	7.1	3.12	123	9.1	14.4	3.9	0.8	1	0	0
109	0	4	35.6	63	116	71	86	22	100	3	3	12.6	3.65	158	9.7	15.9	4.8	1.2	3	1	0
110	0	3	36.3	59	136	99	111.333	20	100	1	0	10.9	3.37	107	10.3	8	4.3	1.1	6	1	0
111	0	2	36	88	128	80	96	24	98	2	0	13.3	4.66	168	14.2	12.4	3.9	0.9	4	4	0
112	0	4	35.7	80	175	108	130.333	14	89	0	0	5.3	3.7	189	10.7	18.5	4	1	6	0	0
113	0	1	36.7	162	149	100	116.333	26	95	5	2	8.7	3.48	148	11.7	14.7	4.1	0.7	1	1	0
114	0	1	36.9	76	134	87	102.667	13	100	0	3	10.1	3.68	287	10	15.3	4.1	0.6	4	0	0
115	0	1	37.2	103	151	90	110.333	13	100	1	12	14.8	3.36	173	10.1	14.2	4.8	1.3	3	5	0
116	0	4	36	73	144	105	118	27	100	2	0	11.7	3.82	358	11.4	8	4.6	0.7	1	2	0
117	0	4	36	73	144	105	118	27	100	2	2	16.4	3.93	150	12.1	14.2	3.9	0.8	1	0	0
118	0	4	35.2	78	126	83	97.3333	31	93	4	2	8.2	3.2	280	9.9	17.1	4	1.4	6	4	0
119	1	4	0	0	0	0	0	0	0	12	0	8.7	4.21	193	12.1	15.8	3.7	1.5	3	1	0
120	0	3	36.7	69	160	84	109.333	20	100	1	0	16	2.84	218	9	3	4.4	1.6	1	1	0
121	0	1	37.8	93	119	99	105.667	13	100	0	1	4.2	1.92	135	7.2	7	3.8	0.6	4	1	0
122	0	4	37	71	140	89	106	12	100	0	0	12	3.34	187	9.8	12.8	4.4	4.6	1	0	1
123	0	4	37	82	130	80	96.6667	20	96	5	0	10.4	4.84	165	15.4	13.2	4.4	1.2	1	0	0
124	1	3	37.4	77	107	66	79.6667	19	100	1	0	13.2	3.05	439	8.5	8	3.8	0.6	6	4	0
125	0	5	36.5	76	120	56	77.3333	15	94	1	2	19.7	2.86	135	9.1	13.9	3.9	2.3	6	1	0
126	1	2	37	101	115	61	79	22	96	3	3	7.8	2.87	34	9.6	19.7	4.2	5.2	1	2	1
127	0	3	37.1	102	133	73	93	20	100	2	0	6.8	4.69	246	13.9	14.3	4.5	0.7	3	0	0
128	0	3	36.5	94	123	103	109.667	21	95	2	0	4.6	3.77	148	11.3	13.4	4	0.8	1	5	0
129	0	4	38.4	80	121	73	89	18	100	1	0	12.4	4.4	281	13.8	13.6	3.9	1.1	1	1	0
130	0	1	35.5	78	142	97	112	17	100	1	8	8.9	4.73	177	14.3	12.7	3.6	1.1	3	0	0
131	0	5	37.9	100	94	65	74.6667	20	95	2	14	10.1	4.53	156	14.3	7	3.6	0.8	1	0	0
132	0	3	37.3	77	133	60	84.3333	26	95	2	0	10.6	4.21	175	13	12.5	3.9	0.5	3	1	0
133	0	4	35.5	96	173	112	132.333	25	94	2	3	8.2	4.2	226	12	13.3	4.2	0.6	6	2	0
134	0	2	37.1	98	139	90	106.333	25	98	2	0	6.6	4.44	155	12.5	13.8	4	0.9	6	1	0
135	0	2	37	82	132	73	92.6667	17	100	1	0	7.3	3.22	267	9.1	13.8	4.9	0.8	1	5	0
136	1	6	36.8	70	171	105	127	20	95	2	0	6.6	3.68	286	10	7	4.3	1.6	6	0	0
137	0	6	37.7	95	191	106	134.333	20	90	1	0	19.8	3.06	171	8.5	16.1	4.2	0.9	1	0	0
138	0	4	35.4	60	115	66	82.3333	23	98	5	0	7.2	3.64	183	11.5	13.6	3.7	0.7	6	0	1
139	0	5	36	100	115	73	87	22	66	4	0	14.9	4.32	230	13.8	14.1	3.8	0.5	1	1	0
140	0	4	36.7	80	150	107	121.333	20	100	1	0	8.4	4.01	315	11.8	16.4	4.5	1	1	1	0
141	0	1	37.1	77	131	71	91	10	100	0	0	6.2	4.25	233	14	12.1	4.1	1.2	1	0	0
142	0	5	36.2	89	180	90	120	20	95	3	1	10.4	4.95	216	14.7	12.8	3.7	0.9	1	2	0
143	1	3	37.3	96	138	47	77.3333	31	100	3	0	6.3	3.75	335	12.4	15.7	4	1.3	1	4	0
144	0	6	36.5	80	134	84	100.667	18	100	1	4	15.3	4.82	208	15.9	12.6	4.3	1.1	1	1	0
145	0	6	36.8	128	107	57	73.6667	20	81	6	0	9.5	4.81	215	15.6	12.4	3.5	1	6	1	1
146	0	3	36.5	65	90	24	46	18	85	4	23	12.6	5.25	188	15.3	13.5	3.3	1	1	1	0
147	0	3	36	98	161	98	119	20	100	1	2	9.9	4.64	264	14.6	12.4	4.2	0.8	1	2	0
148	0	6	36.5	103	86	53	64	32	99	5	11	6.5	4.23	200	10.5	7	4.1	0.8	6	0	0
149	1	7	36.4	75	152	109	123.333	16	99	1	4	10.7	4.17	234	12.5	8	3.8	0.6	3	0	0
150	0	4	37.2	72	165	90	115	16	100	1	0	20.1	4.41	319	13.4	12.4	3.8	0.7	0	1	0
151	0	4	37.3	88	138	92	107.333	14	97	0	3	10.1	3.86	323	11.3	7	3	0.8	6	1	0
152	0	4	36.6	65	145	105	118.333	19	100	1	2	15.8	3.22	62	9	6	4.1	1	1	1	0
153	1	3	37.6	101	133	88	103	20	98	3	0	1.1	2.48	61	9.3	8	4.4	2.4	1	1	0
154	1	6	37.8	108	181	60	100.333	24	94	3	0	13	2.78	28	7.9	19.1	4	1.5	1	0	0
155	0	6	37.1	80	156	89	111.333	18	97	1	13	8.9	4.76	160	13.9	13.2	4.3	1.1	0	0	0
156	0	1	35.3	100	123	90	101	13	100	2	9	2.4	4.18	424	9.5	11	3.9	0.7	1	0	0
157	0	1	36.5	98	129	89	102.333	22	98	2	0	123.8	2.73	337	9.2	12	4.8	1.5	1	0	0
158	0	5	37	100	104	69	80.6667	22	100	2	0	9.8	4.36	166	14	13.6	3.4	0.7	1	0	0
159	0	7	35.3	105	201	101	134.333	26	95	5	0	9.9	4.36	304	12.8	14.5	3.4	0.9	6	0	1
160	0	3	36	103	134	78	96.6667	20	93	2	133	26	3.41	438	8.5	7	5.5	2.5	1	2	0
161	0	4	35.4	70	138	100	112.667	20	100	1	21	4.8	3.68	419	10.8	14.4	4	0.8	1	4	0
162	0	5	37.6	104	137	79	98.3333	13	93	4	0	5.9	4.43	321	13.8	7	4	0.9	4	1	0
163	1	1	36.6	129	84	58	66.6667	28	90	6	5	8.3	3.01	146	6.7	9	4	1.4	3	2	0
164	0	2	37.1	90	124	78	93.3333	20	100	3	0	5.4	4.45	164	13.4	11.9	3.8	1.2	6	0	1
165	0	3	36.7	70	132	77	95.3333	15	100	1	2	5.3	3.44	154	9.6	9	4.9	1.4	1	1	0
166	0	1	37.5	102	110	64	79.3333	24	100	3	18	11.6	4.58	176	15	14.1	5	1.4	1	0	0
167	0	4	35.4	58	118	68	84.6667	13	100	0	15	4.8	4.03	150	10.1	8	5	1.3	6	1	0
168	1	4	36.6	82	128	87	100.667	22	95	2	5	9.2	4.06	180	13.5	12.1	4.2	0.8	0	1	0
169	0	3	36.5	63	108	75	86	12	99	0	0	15.2	4.04	248	12.3	12.3	3.2	1.4	6	0	0
170	0	2	36.9	94	132	80	97.3333	16	99	1	4	4.3	2.69	184	7.9	15	4.6	2.4	0	4	0
171	0	5	37.5	96	149	96	113.667	14	100	0	0	12.1	4.55	242	13.1	12.6	3.8	1	1	1	0
172	0	4	36.5	96	121	73	89	20	100	1	74	15.1	3.81	256	11.9	13.9	4.2	0.9	1	1	0
173	0	7	36.7	103	198	95	129.333	20	98	2	74	18.8	2.39	62	7.5	14.4	3.6	1.2	6	0	0
174	0	4	36.5	66	149	87	107.667	16	97	2	71	36.9	3.22	291	9	8	4.2	0.8	6	1	0
175	0	3	37.3	71	114	69	84	13	95	0	0	3.9	4.24	186	13.8	12.5	3.5	1	1	0	0
176	0	2	36.6	149	118	90	99.3333	25	100	5	3	9.6	4.43	247	13.8	12.9	4.2	0.7	1	0	0
177	0	0	37.1	81	117	62	80.3333	18	100	4	1	6	4.7	159	14.3	8	4.2	1	4	0	0
178	0	2	36.5	81	133	74	93.6667	18	98	2	1	46.4	5.31	206	15.4	14.9	4.1	1.3	1	4	0
179	0	4	36.5	78	153	97	115.667	19	100	1	0	8.6	4.21	425	10.4	7	3.7	0.9	0	1	0
180	0	2	37.5	121	156	117	130	26	100	4	14	17.4	4.52	273	12.8	16.6	4.2	0.6	0	4	0
181	0	3	37.1	66	127	81	96.3333	25	100	2	0	11.8	4.62	229	13.9	12.8	4.4	0.8	6	0	0
182	1	1	34.2	100	102	72	82	19	100	5	0	4.3	2.69	87	8.7	13.1	4.1	2.9	3	0	1
183	0	4	36.5	74	118	59	78.6667	19	98	1	18	11.7	3.8	208	12.3	14.3	4	1.1	1	5	0
184	0	4	36.9	93	139	80	99.6667	20	96	3	16	28.9	5.42	322	15.7	14.9	4.5	1	6	0	0
185	0	2	36.7	84	155	115	128.333	14	99	0	1	9.1	4.77	294	15.4	13.9	3.4	0.7	3	5	0
186	1	4	36.3	70	136	91	106	21	100	4	0	5.2	2.91	214	8.8	14.4	5.1	1.8	1	1	0
187	0	2	37.4	93	96	76	82.6667	27	97	3	98	7.7	3.92	133	11.1	15.3	4.2	1.3	1	0	0
188	1	6	37.6	75	163	73	103	15	95	1	84	10.4	4.62	187	14.5	14.3	4	0.9	0	0	0
189	0	3	36.6	101	149	76	100.333	19	100	3	3	14	4.06	55	10.6	17	4	2.7	1	0	0
190	0	3	37.1	75	149	100	116.333	21	99	2	5	8.9	4.32	148	13.6	6	4.4	0.8	1	1	0
191	0	6	38.2	77	138	72	94	18	100	1	0	11	4.22	242	13.6	12.6	3.8	0.5	1	0	0
192	0	7	37	84	191	86	121	15	100	1	23	15.2	3.54	191	10.7	7	4.6	0.7	1	0	0
193	1	4	36.1	109	125	71	89	27	100	4	0	9.7	4.3	205	11.6	15.7	4.2	0.9	6	1	0
194	0	3	36.5	95	175	106	129	18	96	1	3	19	7.34	372	16.9	17.1	3.7	1.6	4	1	0
195	0	4	37.1	73	147	96	113	19	98	2	0	10.2	2.38	246	6.5	8	3	4.7	1	0	0
196	0	2	37.6	95	103	72	82.3333	16	100	1	1	8.8	4.84	229	14.8	12.7	4.2	0.8	1	0	0
197	1	4	37.8	80	128	86	100	16	100	1	4	26.6	3.61	74	12.2	8	3.8	1.3	6	1	0
198	0	3	37.7	82	114	80	91.3333	9	100	0	15	38.4	3.1	365	10.3	18.6	4.6	7.7	6	2	0
199	1	4	36.5	108	169	107	127.667	27	98	5	7	6.6	2.19	48	8	18.6	3.4	1.8	3	0	1
200	0	4	34.4	65	117	69	85	16	98	3	3	10.8	3.59	184	10.7	8	3.2	1.1	0	1	0
201	0	6	36.9	72	155	86	109	33	98	4	20	13.3	3.26	366	10.1	14.2	4	1.5	1	2	0
202	0	4	37.6	77	118	76	90	18	95	1	3	20.8	5.48	540	14.7	6	3.7	1.2	0	0	0
203	0	3	37.3	107	130	80	96.6667	18	99	2	8	9.1	5.23	190	15.1	13.8	4.3	1.5	5	1	0
204	1	5	37.7	98	159	81	107	25	98	3	0	2.1	2.94	35	8.2	8	5.1	4.2	6	1	0
205	0	1	37.5	88	147	78	101	23	96	2	56	36.5	4.3	304	12.7	4	3.9	0.7	6	2	0
206	1	5	37.1	76	129	63	85	20	93	1	4	7	4.42	120	12.1	16.5	3.9	2	1	1	0
207	0	3	38.8	103	141	77	98.3333	16	100	4	19	12.8	3.35	238	10.8	13.3	3.7	0.8	6	1	0
208	0	1	36	86	100	60	73.3333	18	70	5	15	12.7	4.36	174	12.6	12.6	3.8	0.7	5	1	0
209	1	6	37.6	64	178	82	114	19	98	1	1	9	2.16	91	6.1	19.5	3.7	0.6	1	1	0
210	0	3	37.2	58	128	66	86.6667	16	97	1	7	17.6	4.89	279	15.2	12.7	5.5	0.8	0	2	0
211	0	6	37	91	131	67	88.3333	19	95	1	4	14.1	3.87	556	10.6	6	4.5	0.5	1	1	0
212	0	5	37	58	146	93	110.667	17	100	1	0	8.5	3.91	271	11.5	8	3.4	0.7	1	1	0
213	0	5	37	58	146	93	110.667	17	98	1	5	15	3.83	189	11.8	6	4	0.6	0	1	0
214	0	5	36.6	107	133	85	101	27	91	3	7	8.9	4.61	302	12.4	13.9	4.5	0.8	1	1	0
215	0	1	36.6	94	124	86	98.6667	20	100	1	2	12.8	2.77	82	8.4	13.9	4.4	1.3	1	1	0
216	0	3	37.4	97	145	84	104.333	23	100	2	9	5.3	2.62	171	7.9	15.1	4.5	6.9	0	1	0
217	1	2	36.7	78	96	66	76	15	98	2	2	8.5	2.63	7	7.6	8	4	0.9	1	1	0
218	1	3	36.5	87	116	81	92.6667	20	100	1	5	5.9	3.72	223	11.4	13.1	4.8	1.5	6	1	0
219	0	3	36.5	125	110	78	88.6667	18	99	3	16	9.7	4.07	165	13.3	11.3	3.9	0.7	0	4	0
220	0	1	35.8	89	140	80	100	20	100	3	16	8.4	3.4	157	11.5	11.9	4.4	0.8	6	0	0
221	1	5	38.2	96	146	69	94.6667	25	100	2	0	7.2	5.12	241	15.5	11.9		1	0	1	0
222	0	1	37	109	113	69	89	30	74	12	16	14.6	4.33	183	13.8	19.6	3.6	6.8	6	2	1
223	1	1	36.1	111	128	77	94	16	96	4	0	7.7	3.82	127	11.3	4	3.9	1.5	1	1	0
224	1	3	36.7	81	80	51	60.6667	7	100	4	7	8.1	3.96	48	11.2	16.1	3.6	1	1	1	0
225	0	5	36.3	59	146	93	110.667	20	95	1	71	16.6	4.17	235	13.9	12.1	4.5	1.2	6	1	0
226	1	5	37.5	94	133	67	89	16	98	1	1	6.9	3.13	220	8.7	6	4.6	0.9	6	1	0
227	1	3	37.2	73	121	78	92.3333	18	97	1	0	8	5.21	280	15.2	12.5	4.6	1.1	1	2	0
228	0	5	37.2	83	188	95	126	23	100	2	2	23.9	3.26	118	10.1	15.5	4.1	1.6	0	1	0
229	0	3	36	108	110	60	76.6667	29	71	6	2	9.5	4.06	229	13.7	12.4	4.2	6.1	3	1	1
230	1	5	35.5	82	85	53	63.6667	20	93	2	5	8.8	4.18	250	11.9	14.7	4	1.1	1	5	0
231	1	4	36.3	72	104	75	84.6667	22	100	2	36	10.5	3.97	209	11.3	12.6	3.3	0.5	6	1	0
232	1	5	35.3	77	112	68	82.6667	16	98	3	18	12.2	3.25	226	10.6	14.3	3	0.7	1	5	0
233	0	4	37.9	84	156	107	123.333	18	100	2	0	8.2	3.66	193	11.4	14.2	3.9	0.9	1	1	0
234	0	4	37.2	107	79	62	67.6667	17	91	7	21	12.5	4.53	117	14.3	17	3.9	0.7	6	1	1
235	1	4	36.8	97	182	109	133.333	23	95	2	0	9.1	2.58	140	7.8	13.8	4.7	5.8	1	4	1
236	0	4	36.5	154	109	76	87	10	100	3	0	13.2	5.14	171	14.3	14	3.3	2.8	3	1	0
237	0	5	38.4	88	156	75	102	19	96	1	0	10	4.93	243	12.6	14.5	5.1	1.6	1	4	0
238	0	5	37.2	98	216	121	152.667	26	98	4	40	17.3	3.59	231	12.2	13.7	3.3	0.5	0	1	0
239	0	2	37	121	143	91	108.333	15	95	5	65	6.4	3.78	361	10.9	13.8	4	0.6	6	1	0
240	0	2	37.3	85	146	124	131.333	17	100	1	32	7.5	4.93	211	13.3	14	5.5	1.1	1	0	0
241	0	4	36.8	64	120	66	84	15	92	3	0	5	4.19	246	10.6	8	3.8	0.8	1	0	0
242	0	5	36	65	232	117	155.333	20	100	5	0	5.5	2.51	73	7.4	16.3	4.7	1.6	6	1	0
243	0	3	38.4	102	131	70	90.3333	22	95	3	17	13.9	3.27	254	10.2	17.4	3.5	1.2	6	1	0
244	0	4	37.4	72	139	91	107	24	99	2	15	16.9	4.26	129	13.3	6	4.5	1.2	1	1	0
245	0	1	36.9	120	132	72	92	18	100	3	2	8.5	4.79	230	14.3	14.6	2.7	1	6	1	0
246	0	3	37.1	60	121	81	94.3333	16	97	1	2	10.9	4.29	130	13.2	13.3	3.8	0.9	6	0	1
247	1	3	36.4	96	103	58	73	18	96	1	8	5.7	3.68	110	12.1	12.5	4.9	1.6	6	5	0
248	0	2	36.7	95	131	80	97	20	100	1	10	8	3.73	224	11.5	12.4	3.9	0.5	6	1	0
249	0	5	37.8	72	179	81	113.667	21	100	3	0	30.3	3.43	340	8	21.4	6.7	5.3	1	0	1
250	0	3	37.5	98	160	102	121.333	25	100	2	28	10.4	3.02	268	9.5	15.7	3.8	0.8	1	1	0
251	0	4	36.7	53	139	124	129	18	99	1	2	16.1	4.71	281	13.3	14	2.7	1	1	1	0
252	0	5	37.5	73	102	61	74.6667	20	100	1	25	12.2	4.38	249	14	7	4.1	0.5	1	1	0
253	1	5	36.5	68	160	88	112	22	98	2	0	11.7	4.53	204	13.5	5	3.9	0.7	1	1	0
254	0	4	36.8	98	189	116	140.333	29	95	4	68	12.3	4.81	129	13.3	14.1	3.8	0.6	6	1	1
255	0	4	36.8	85	143	85	104.333	25	97	2	58	42.7	2.09	13	6.8	8	3.9	0.8	1	1	0
256	0	4	37.4	91	156	92	113.333	17	96	1	41	13.4	3.04	158	9.5	14.7	3	4.7	0	0	0
257	0	2	37.7	96	157	87	110.333	19	97	1	13	16.3	4.32	315	13.2	12.9	3.7	0.9	1	5	0
258	0	2	37.8	122	151	105	120.333	15	95	3	0	17.4	4.5	167	13.7	12.3	4.4	0.9	1	0	0
259	1	4	36.5	72	120	85	96.6667	20	100	1	1	11.4	4.13	168	13.1	12.2	3.5	0.7	6	1	1
260	1	7	36.9	101	187	88	121	20	96	2	1	10.6	5.76	222	16.7	14	4.2	0.6	1	2	0
261	0	3	36.3	80	138	86	103.333	15	98	1	2	8.8	4.31	173	9.8	5.2	4	0.8	1	5	0
262	0	4	36	100	93	58	69.6667	15	93	5	0	16.3	3.79	455	11.9	13.7	4.6	0.7	4	2	0
263	0	3	37.1	96	131	88	102.333	20	98	1	27	12.9	3.1	137	9.4	5	3.7	0.7	0	1	0
264	0	3	37.4	95	140	92	108	20	92	1	0	8.7	4.16	267	12.1	15.1	3.6	0.8	6	1	1
265	0	2	37.9	90	118	71	86.6667	24	100	2	0	16.5	3.1	389	9.3	13.1	4.3	0.7	1	1	0
266	1	3	37.3	56	121	71	87.6667	23	98	3	11	12.3	3.02	241	8.3	14	3.8	1.7	3	0	0
267	0	5	36.5	109	132	81	98	19	93	2	10	9.1	4.64	217	13.6	14.7	3.7	0.7	1	1	0
268	0	2	36.3	89	99	62	74.3333	18	100	2	1	9.7	3.79	197	12.4	13.7	4.1	0.8	3	1	0
269	0	6	37.5	72	146	55	85.3333	19	100	1	12	9.1	3.95	156	10.9	15.9	4	0.5	1	1	0
270	0	1	37.4	79	123	87	99	22	98	2	3	18.8	5.42	140	13.8	13.5	4.3	2.3	4	1	0
271	1	3	37.1	79	113	83	93	20	98	1	1	3.5	3.45	224	10.6	13.6	3.3	1.8	1	1	0
272	0	5	36.6	71	169	73	105	16	100	1	0	9.3	4.14	281	12.5	6	3.3	0.8	6	4	0
273	0	3	37.8	85	145	75	98.3333	20	100	1	2	204.4	2.74	19	8.2	19.5	4.1	1	1	5	1
274	0	0	37.4	67	145	75	98.3333	20	95	1	2	11.4	3.37	119	9.8	17.5	5	10.2	6	0	0
275	0	1	37.3	85	129	88	101.667	17	99	1	1	14.5	2.42	272	9	12.8	4.5	0.6	0	1	0
276	0	6	36.2	128	119	75	89.6667	25	94	6	67	7.6	4.12	157	13	12.9	3.8	0.7	6	1	1
277	0	6	37	81	182	75	110.667	20	99	1	6	4.2	4.48	182	12.1	16.3	2.8	0.6	0	1	1
278	0	2	37.2	85	144	70	94.6667	14	95	0	42	17.8	3.25	60	10	7	3.6	0.6	1	2	0
279	0	2	37.6	88	133	96	108.333	22	98	2	1	6.4	2.93	229	9.2	13.8	4.4	1.2	0	1	0
280	1	1	38	90	108	65	79.3333	20	98	1	1	9.8	4.18	420	10.2	5	4	1.5	6	1	0
281	0	2	37.3	88	149	75	99.6667	14	93	1	1	9.2	4.68	272	14.8	13.4	4.1	1	6	1	0
282	0	3	37	85	146	96	112.667	19	96	1	9	21.6	4.26	272	13.3	9	4	0.9	3	2	0
283	1	3	36.5	85	86	61	69.3333	20	99	2	3	11.2	3.17	187	10.3	12	4.4	0.9	1	1	0
284	0	3	38.3	100	146	108	120.667	26	99	4	0	7.9	4.08	249	12.1	14.5	4.4	1.2	6	1	0
285	0	3	36	75	133	91	105	16	93	1	2	5.8	3.65	339	10	13.4	4.4	0.6	1	0	0
286	0	7	36.5	72	148	81	103.333	20	97	1	0	10.3	4.76	268	11.8	14.9	3.8	1	6	0	0
287	1	0	37.2	83	131	75	93.6667	18	100	1	22	9.3	2.89	190	9.6	12.8	4.4	1	1	1	0
288	0	1	37.2	95	156	96	116	20	96	1	2	5.6	4.1	167	14.2	13.3	4	1.2	1	1	0
289	0	3	37.5	110	145	97	113	25	100	2	21	11.6	3.31	80	9.5	13.9	4.1	1.1	1	5	0
290	0	3	36	53	186	81	116	30	91	4	232	0.3	2.67	12	7.8	16.8	4.1	1.2	1	1	1
291	0	4	37.3	88	154	102	119.333	20	98	1	0	12.4	4.42	217	13.2	11.9	3.8	0.9	1	1	0
292	0	2	36.2	85	107	77	87	20	94	4	16	10.3	3.65	107	11.1	7	4	1.2	6	5	0
293	0	3	37.3	103	169	105	126.333	26	99	3	3	19.8	4.01	355	12.4	12.6	3.3	0.6	1	1	0
294	0	2	37	94	135	88	103.667	20	100	1	24	8.2	3.72	111	10.5	14.7	3.3	0.7	0	5	0
295	1	5	36.6	87	163	84	110.333	17	99	1	1	12	3.7	204	11.9	13.8	3.3	1.4	1	4	0
296	0	3	36.3	71	118	84	95.3333	20	100	1	2	13.9	3.84	620	10.2	16.7	4.1	0.6	0	1	0
297	1	3	36.6	110	96	74	81.3333	29	98	4	1	21.9	5.2	409	14.8	15.5	3.8	0.7	1	0	0
298	0	5	36.7	74	157	96	116.333	21	90	5	1	10.3	4.03	274	11.4	14	3.6	0.9	6	2	0
299	1	2	36.5	51	73	46	55	12	92	5	1	15.2	4.73	283	11.6	19.4	4.8	0.8	6	1	0
300	1	4	36.3	80	148	111	123.333	20	98	1	0	20.1	3.55	56	10	14.2	3	2.8	6	2	1
301	0	2	36.3	78	133	77	95.6667	20	97	1	10	6.9	4.5	196	13.5	12.3	4.8	0.7	1	5	0
302	0	3	36.5	95	120	71	87.3333	18	95	1	1	14.3	3.96	154	12.3	13.9	3.5	2.5	1	0	0
303	0	3	37.4	82	114	69	84	26	100	2	0	9.2	5.29	228	15.8	13.2	4.4	0.8	1	1	0
304	1	5	37.6	77	135	80	98.3333	19	98	1	0	6	4.82	205	14.6	14.2	4.7	1	6	1	0
305	1	4	36.1	68	87	51	63	13	97	1	11	9.6	4.43	213	13.2	14.1	4.3	0.7	1	1	0
306	0	6	36.4	79	119	78	91.6667	18	95	1	3	8.6	5.43	222	16	3	4.1	1.1	0	1	0
307	0	2	37.3	116	118	63	81.3333	19	95	3	3	16.2	3.22	103	9.9	16.9	4	0.7	0	2	0
308	0	5	37.4	76	163	92	115.667	19	83	4	1	12.4	5.44	223	16.1	6	4.7	0.9	1	5	0
309	0	4	36.9	65	179	94	122.333	10	95	0	0	12.2	4.57	302	13.7	13.3	4.6	1.3	1	5	0
310	0	3	36.5	78	116	72	86.6667	25	92	2	15	10.8	4.16	179	12.5	12.2	4.9	5.7	1	1	1
311	0	4	37.2	77	107	63	77.6667	18	99	1	3	9.9	4.32	443	10.6	16.4	4	1.1	6	0	0
312	1	5	36.4	94	130	80	96.6667	35	97	4	2	9.2	3	414	8.6	15	3.5	0.9	0	1	0
313	0	5	36.5	130	90	60	70	21	91	6	2	12.3	4.82	224	14.1	14.2	4.7	1	1	1	0
314	0	4	37.4	62	137	81	99.6667	18	95	1	21	6.9	3.61	122	11.2	8	5.1	0.5	1	1	0
315	0	5	37.1	70	138	92	107.333	20	98	1	0	13.6	5.03	347	14.6	13.6	3.4	0.7	6	0	0
316	0	7	37.1	53	158	73	101.333	20	96	1	0	18.2	5.05	331	15.8	7	4.3	0.9	6	1	0
317	0	2	37.4	105	101	69	79.6667	30	100	4	0	17.8	5.43	871	16.4	13.4	4.5	1.3	1	1	0
318	0	5	36.4	95	77	50	59	30	95	5	0	8.8	4.54	341	12.5	6	3.7	1.9	6	1	0
319	0	0	37.5	111	143	115	124.333	20	97	3	0	6.2	4.25	192	14.2	12.1	4	0.8	1	1	0
320	1	4	37.2	74	134	76	95.3333	33	99	3	1	7.2	4.72	297	12.5	15.6	4.2	1.6	6	1	0
321	1	1	36.9	97	112	88	96	35	92	3	0	10.8	4.28	350	13.8	13.7	4.6	0.8	6	1	0
322	0	4	36.9	112	144	96	112	25	95	5	0	5.9	4.94	116	12.6	14.3	3.9	1	6	1	1
323	0	3	36	93	90	59	69.3333	15	100	2	2	6.7	4.2	232	12.2	12.2	4.7	1.1	0	1	0
324	0	1	37.9	82	129	76	93.6667	19	89	1	3	5.6	4.14	180	12.4	14.4	4.3	0.9	1	1	0
325	0	4	37.1	96	172	103	126	19	91	1	3	8.9	4.31	185	12.5	14.3	3.6	1.6	1	1	0
326	0	4	37.9	101	162	93	116	31	97	4	0	14.8	2.51	253	8.3	12	4	1.7	2	1	0
327	0	5	38	76	135	84	101	15	95	1	0	5.7	2.68	169	6.5	8	3.3	1.4	6	1	0
328	0	3	35.5	99	69	49	55.6667	19	95	4	2	6.9	3.09	374	6.6	22.8	6.7	5.8	6	0	1
329	1	5	37.7	79	170	101	124	15	99	1	0	12.7	4.16	373	14.1	14.6	4	0.8	2	1	0
330	0	5	37.6	104	129	82	97.6667	20	86	4	0	13.8	4.3	199	13.7	6	3.8	0.7	4	1	0
331	0	4	35.9	78	135	84	101	30	60	5	0	17.5	4.46	362	12.2	15	3.6	0.8	6	2	1
332	0	1	35.6	140	127	79	95	30	96	8	3	9	3.11	191	9.5	13	5.1	1.9	0	2	0
333	0	3	38	118	117	83	94.3333	31	88	7	18	8.7	3.21	169	8.4	8	3.7	0.7	2	1	0
334	0	1	36.7	99	141	56	84.3333	15	96	2	0	37.9	6.33	410	17.3	7	4.3	1.7	4	1	0
335	0	0	38.5	120	92	46	61.3333	17	81	6	6	19.6	2.74	370	8	14.9	3.9	1.2	3	1	1
336	1	5	37.4	112	143	94	110.333	17	91	5	10	15.8	5.05	211	15.3	12.6	3	1.2	5	2	0
337	0	1	37.5	70	121	68	85.6667	20	96	1	5	7.1	3.42	244	11.7	8	4	0.7	2	5	0
338	1	4	37.5	114	110	70	83.3333	14	80	5	0	7.9	4.07	209	12.3	13.3	3.6	1.9	6	1	1
339	0	1	37.3	80	107	79	88.3333	25	100	2	1	6.9	4.41	274	12.6	8	3.9	1.1	3	1	0
340	1	4	37	79	169	91	117	18	96	2	0	15.8	3.81	190	12	12.3	4	1.2	0	1	0
341	1	5	37	79	169	91	117	18	96	2	2	15.4	4.22	385	12.5	14.5	4.5	1.3	6	1	0
342	0	1	38.2	112	100	54	69.3333	15	100	4	32	9.2	3.95	148	13.5	8	3.7	1.1	0	0	0
343	0	4	36.5	76	140	81	100.667	16	94	1	1	9.2	3.97	160	11.4	14.5	3.7	0.5	3	0	0
344	0	5	37.2	61	257	92	147	15	93	5	0	8.3	3.58	88	10.9	13.8	3.7	2.4	2	1	0
345	0	4	37	108	151	121	131	26	84	3	10	19.9	5.43	184	16.3	14.1	3.1	0.9	6	1	0
346	0	5	37.2	104	157	93	114.333	20	95	4	2	5.6	4.51	242	13.3	11.9	5	1	0	2	0
347	0	2	37.8	90	95	65	75	21	91	3	0	29.5	3.69	309	10.8	8	4.6	1.3	0	5	0
348	1	5	37	61	191	86	121	20	92	2	17	6.9	3.56	236	11.8	11.7	4.4	1.5	2	0	0
349	1	3	38	84	150	77	101.333	27	100	2	13	8.2	3.14	74	9.1	14.6	4.3	1.3	2	1	0
350	1	5	36.7	74	109	74	85.6667	18	100	2	5	9.7	3.81	330	10	8	3.6	1.5	0	2	0
351	0	4	36.8	66	187	99	128.333	17	97	3	0	8.7	3.15	192	8.9	14.8	4.3	1	6	1	0
352	0	3	36.4	69	111	89	96.3333	22	100	2	0	10.3	3.45	189	9.9	14.7	4.6	0.9	2	2	0
353	0	2	36.7	112	85	55	65	26	92	6	4	13.9	4.71	175	15.1	12.2	4.3	0.9	0	1	0
354	1	4	36.5	81	148	98	114.667	18	99	1	0	7	2.9	255	8.6	14.3	4	1.3	2	1	0
355	1	6	37.7	104	161	73	102.333	20	87	5	1	17.5	3.69	177	11.5	14.5	4.3	5	0	1	1
356	0	3	37.9	83	131	73	92.3333	20	100	2	0	8.6	3.29	182	10.6	12.6	3.5	0.5	0	1	0
357	0	1	37.7	77	150	73	98.6667	17	98	1	5	11.5	3.83	292	7.3	7	4	0.9	0	1	0
358	0	6	37.1	65	164	90	114.667	17	94	1	21	14.3	3.55	106	11.2	12.5	4.6	1.1	6	1	0
359	0	7	37.5	109	134	72	92.6667	25	89	3	0	19.1	3.7	265	11.5	12	3.7	0.6	6	1	0
360	0	5	36.4	66	143	67	92.3333	15	96	1	0	24	5.77	100	18.3	12.8	4.9	3.3	4	1	0
361	1	3	37.4	80	137	95	109	30	98	3	0	10.4	2.86	406	9	13.2	4.4	0.9	6	1	0
362	1	5	36.4	80	143	71	95	21	96	4	5	32	4.16	620	12.8	14.4	5	0.6	0	2	0
363	0	3	37.6	107	143	71	95	23	95	3	3	18.1	2.64	169	9	14.3	3.9	1.3	0	5	0
364	1	4	36.9	77	117	76	89.6667	15	99	1	0	10.6	4.57	254	13.5	14.6	5	2.2	0	0	0
365	0	2	36.8	86	126	81	96	20	95	1	1	11.8	4.24	211	12.5	12.9	3.6	0.7	4	2	0
366	0	3	37.2	82	159	116	130.333	15	100	1	6	15.1	4.14	204	13.7	15	3.6	1.3	0	2	0
367	0	0	37.8	57	121	66	84.3333	17	100	1	0	6.1	3.09	101	8.1	18.3	3.5	1.2	6	4	0
368	0	2	36.3	72	106	61	76	18	98	1	2	13.1	3.77	177	12	15.5	4.7	3.7	0	1	0
369	0	6	36.4	44	199	83	121.667	17	100	5	0	7.4	3.86	78	11.9	13.4	4.1	1.1	0	1	0
370	0	1	36.6	76	129	82	97.6667	22	97	2	3	12.9	5.51	185	15.3	16	5	5.1	0	1	0
371	0	1	36.6	82	137	83	101	22	98	2	2	8.2	3.24	125	9.3	8	3.9	0.7	6	1	0
372	0	6	36.9	69	214	109	144	20	96	5	0	8.3	2.92	123	8.6	8	4.5	1.1	0	1	0
373	0	6	36.9	88	127	87	100.333	18	96	1	24	7.4	3.39	255	10.3	8	4.3	1.2	0	1	0
374	0	5	39.2	137	153	71	98.3333	27	82	9	0	7.8	4.85	191	15.4	12.6	5.4	5.4	0	2	1
375	0	3	36.9	99	129	88	101.667	18	98	2	5	16.8	3.69	241	10.1	8	4.5	1.7	0	1	0
376	0	4	37.5	66	135	93	107	10	97	0	3	10.1	4.93	280	14	14.3	4.4	0.9	0	2	0
377	0	6	37.6	66	179	107	131	20	99	1	0	13.1	4.48	244	13.7	13.7	3.8	2.5	0	0	0
378	0	4	37.6	66	179	107	131	20	99	1	13	6	4.47	222	12.6	8	4	0.9	6	1	0
379	1	3	37.4	100	153	78	103	20	97	1	0	2.7	3.85	72	9.6	8	3.9	0.8	0	0	0
380	0	1	38.1	99	124	71	88.6667	18	100	2	2	8.4	4.09	251	11.6	8	4.2	0.6	0	1	0
381	1	7	36.5	87	141	85	103.667	20	99	1	1	11.2	4.89	298	15.3	3	3	0.8	0	1	0
382	0	4	36.8	84	139	87	104.333	22	100	2	1	7.5	4.7	222	13.7	12.1	4.3	0.9	0	1	0
383	0	5	36.5	80	150	80	103.333	16	99	3	41	13.8	4.29	279	12.8	6	3.8	0.8	6	1	0
384	1	0	36	152	151	85	107	20	94	6	86	15.4	1.72	336	5.1	17.3	3.1	4	6	1	1
385	0	5	36	86	128	101	110	16	100	3	26	15.6	4.46	228	13.7	13.5	3.8	0.7	0	1	0
386	0	4	37.3	78	226	126	159.333	16	86	5	3	7	3.39	242	9.2	14.4	5.8	5.9	0	0	1
387	1	2	36.7	105	130	62	84.6667	20	95	2	9	7.7	3.95	244	10.2	15.9	3.7	1.1	6	1	0
388	0	1	37.3	86	137	84	101.667	22	100	2	23	9	4.63	250	13.9	7	4.2	1	0	2	0
389	1	7	37.9	165	133	86	101.667	22	96	4	68	13.6	4.32	319	12.8	8	4.6	1.2	0	1	0
390	0	5	37.2	56	157	90	112.333	20	96	1	0	9.2	3.76	217	11.2	14.2	4.1	2.3	0	1	0
391	0	3	36.9	83	131	87	101.667	18	92	1	1	16.7	3.66	251	10.8	14.8	5	1	5	0	0
392	0	1	37.2	69	117	68	84.3333	15	100	2	8	11.3	3.28	220	9.9	16	4	6.3	0	1	0
393	0	1	37.2	64	135	70	91.6667	17	98	1	1	14.1	3.74	70	11.2	18.3	3.9	1	0	1	0
394	0	1	36.9	89	100	60	73.3333	18	99	2	3	7.6	3.36	131	11.1	15.7	4.1	0.5	6	1	0
395	1	1	36.5	76	106	69	81.3333	18	99	1	16	4.4	4.07	138	13.5	12.8	4.4	0.9	0	1	0
396	0	3	37.2	94	139	96	110.333	20	100	2	3	7	2.81	129	7.9	16	3	4.3	0	4	0
397	0	2	37.2	71	130	83	98.6667	18	96	1	24	7.6	4.19	130	11.9	7	4.2	1.1	6	0	0
398	1	5	37.3	83	134	97	109.333	17	95	1	5	8.3	2.95	170	8.3	18.8	4.1	2	0	1	0
399	0	2	37.8	104	190	72	111.333	15	100	3	14	11.2	3.36	149	10.4	12.7	3.9	1.3	6	1	0
400	1	2	36.6	108	101	88	92.3333	18	99	2	43	5.7	3.23	101	8.6	19	3.7	1.6	6	0	0
401	0	5	36.6	59	132	58	82.6667	18	98	1	17	9.2	2.06	226	6.6	14.4	4.1	1	0	1	0
402	1	2	37.3	98	115	76	89	15	100	1	0	15.7	4.55	220	13.3	15.8	4.1	0.6	3	1	0
403	0	2	37.7	71	134	87	102.667	17	98	1	3	8.5	3.85	157	12.3	13.5	4.2	1.7	0	1	1
404	1	5	36	75	137	79	98.3333	25	92	2	15	12.7	3.29	139	10.4	8	5	0.8	0	0	0
405	1	5	36.9	78	153	77	102.333	16	99	1	12	13	4.83	227	14	12.1	4.2	1	0	1	0
406	0	6	37	98	158	94	115.333	19	100	4	0	8.5	4	189	13	12.5	4.5	1.4	0	1	0
407	0	4	37.4	119	173	80	111	22	95	6	2	16.8	3.55	284	7	11	5.5	2.4	0	0	0
408	1	3	37	116	92	68	76	27	96	7	0	16.5	3.66	175	10.7	12.7	3.7	0.7	0	1	0
409	1	3	35.5	127	87	63	71	16	96	5	15	8.6	4.43	201	13.2	4	4.4	0.7	0	0	0
410	0	4	36.8	102	99	63	75	31	97	5	2	8.3	3.88	233	12.9	13	3.7	1.1	6	5	1
411	1	5	37.7	66	168	90	116	22	95	3	0	11.9	4.2	167	13.2	15.2	4.7	1.4	6	1	0
412	0	2	36.7	47	159	85	109.667	10	100	4	3	11.1	4.96	194	13.6	14.6	3.8	1.2	4	1	0
413	1	3	36.8	85	154	91	112	18	99	3	16	17.9	2.98	444	8.7	15.3	4.1	1.8	3	5	1
414	0	3	36.2	77	119	88	98.3333	12	100	0	1	7.5	3.71	180	12.5	12.2	3.8	0.9	0	1	0
415	0	3	38	161	166	139	148	35	95	6	24					28	6.5		6	1	1
416	0	1	36.5	85	112	75	87.3333	20	100	1	13	8.9	1.88	53	5.7	16.4	2.7	4.7	0	1	0
417	1	1	36.8	78	127	78	94.3333	20	97	1	7	8.6	2.9	307	8.4	6	3.4	0.6	0	1	0
418	0	1	37	96	117	74	88.3333	17	96	1	2	10.1	4	328	13.3	8	3.3	0.5	3	5	0
419	0	1	37.6	102	126	65	85.3333	16	100	2	6	30.3	4.33	229	14.2	11.9	3	0.9	0	1	0
420	0	5	36.8	81	107	92	97	18	95	1	1	15.4	3.12	136	9.2	14.2	4.3	1	6	0	0
421	0	4	37.2	89	137	85	102.333	20	96	1	2	8.6	4.73	51	14.7	12.5	2.8	1.5	0	5	0
422	0	4	37.6	78	145	106	119	16	98	1	0	9.8	4.35	246	13.3	13	4.3	1.1	0	1	0
423	1	2	36	66	124	73	90	13	95	1	10	11.9	4.5	131	12.5	5	4	0.9	0	5	0
424	0	3	36	81	131	88	102.333	22	100	2	1	25.3	4.61	381	12.7	15.6	4.9	0.7	0	1	0
425	1	5	36.5	81	155	84	107.667	18	99	2	1	8.1	2.93	174	8.9	15.7	3.3	0.4	0	1	0
426	0	2	37.7	70	131	79	96.3333	16	99	1	14	17.5	4.27	220	12.7	12.5	3.8	0.7	0	1	0
427	1	5	36.3	102	144	76	98.6667	26	96	3	10	19.3	4.2	181	13.2	14	4	4.6	6	4	0
428	1	6	37.5	63	100	55	70	19	100	2	14	14.9	3.2	110	10.1	13.3	5.8	4.1	0	0	1
429	1	5	36.9	79	123	69	87	21	98	2	2	14.7	3.05	341	8.3	13.4	4.1	0.8	3	1	0
430	0	3	37	89	132	81	98	18	99	1	4	16.7	4.78	362	14.3	15.6	4	1.6	6	0	0
431	0	1	37	129	112	78	89.3333	19	96	3	15	7.8	5.16	310	14.2	7	4.5	0.9	6	4	0
432	0	5	37.4	83	138	87	104	18	100	1	15	11.9	4.68	206	11.9	16.4	3.5	1	4	1	0
433	1	7	36	87	102	50	67.3333	16	98	1	0	13.8	2.72	127	9.1	12.6	3.6	0.8	6	1	0
434	0	5	37.5	95	129	83	98.3333	19	99	3	0	11.8	4.79	333	14	12.5	4.5	0.7	0	1	0
435	1	3	36.5	89	132	87	102	18	100	1	12	13.3	4.81	264	14.2	13	4.6	0.8	5	5	0
436	1	3	37	153	114	97	102.667	18	75	7	0	13.4	4.89	310	14.6	15.6	3.9	0.9	0	1	1
437	1	5	37.8	94	91	55	67	18	100	2	113	7.5	4.96	166	15.4	14.8	5	1.7	5	1	0
438	0	3	36	74	132	84	100	13	98	0	1	16.2	4.28	201	12.9	8	4.1	1.1	6	1	0
439	0	5	36.1	85	109	64	79	27	93	2	1	21.4	3.3	405	9.6	13	3.7	1.2	0	1	0
440	0	3	37.6	135	109	68	81.6667	18	96	4	6	10.5	4.98	253	13.5	12.1	4.4	1.1	6	1	0
441	0	4	36.5	82	136	79	98	16	98	1	2	14.2	3.28	300	9.1	18.3	4.5	1.8	0	1	0
442	0	7	37.2	98	153	65	94.3333	23	96	4	15	5.2	3.75	562	9.7	21.3	4.5	5.1	0	0	1
443	0	3	37.5	56	145	85	105	19	95	4	3	12.7	3.45	199	10.6	8	4.4	1.3	0	0	0
444	0	3	36.8	110	153	100	117.667	19	95	2	0	5.3	4.11	414	11.2	14	3.7	0.5	0	1	0
445	1	3	37	95	116	78	90.6667	16	100	1	0	8.6	3.28	315	9.1	8	2.6	0.5	6	1	0
446	0	4	36.1	90	115	64	81	17	97	4	0	7.8	4.69	135	14.8	13	5	1.1	5	1	0
447	0	3	36.5	72	161	127	138.333	20	97	1	0	21.9	4.38	359	12.2	12.6	3.5	0.8	0	1	0
448	1	5	37	76	117	92	100.333	21	100	2	2	16.2	3.43	501	11.6	7	4	0.8	6	1	0
449	0	5	37.4	100	131	83	99	15	100	1	15	10.3	3.89	538	10.5	16.8	3.6	0.9	0	2	0
450	0	2	37.3	135	139	98	111.667	25	93	5	14	8.9	3.92	283	8.2	12	4	1.3	6	1	0
451	0	2	38.2	117	104	51	68.6667	20	95	3	0	6.4	4.35	191	13.4	12.7	3.7	0.9	0	1	0
452	0	7	39.2	208	103	56	71.6667	26	97	7	2	7.1	3.58	159	12.2	14	3.9	0.9	6	1	1
453	0	4	36.9	105	174	84	114	14	98	1	1	4.8	4.45	195	12.9	14	5	0.7	0	1	0
454	0	4	37.5	90	130	90	103.333	16	100	1	5	9.8	4.29	151	11.3	15.2	4.3	0.9	0	1	0
455	0	1	38.3	105	124	64	84	21	100	3	0	6.3	3.92	225	12.1	12.8	3.7	1.2	0	4	0
456	0	3	36.9	74	143	87	105.667	25	99	2	5	20.5	3.43	220	10.6	14.9	4.5	2.2	0	0	0
457	0	6	36.8	67	139	81	100.333	16	100	1	7	8.6	4.39	101	12	13.8	4.4	5.8	0	1	0
458	0	5	37.1	85	147	100	115.667	25	100	4	0	12.7	4.41	217	13.7	14.8	4.3	4.8	0	2	1
459	1	4	37.6	82	153	83	106.333	15	97	1	15	10.5	4.78	196	14.3	13.1	3.3	0.6	0	5	0
460	1	6	36.6	76	158	68	98	13	100	0	14	9.5	3.97	195	11.9	9	4	0.5	0	5	0
461	0	4	37	81	182	75	110.667	20	96	9	3	9.1	4.47	225	13.3	17.9	4.3	5.8	3	4	1
462	0	1	36.9	55	140	95	110	25	85	2	3	7.3	4.02	185	11.4	14.2	5	1.4	0	4	0
463	0	7	36.4	83	142	119	126.667	16	94	1	3	17.7	3.63	329	8.5	17.7	4	3.7	0	5	0
464	0	1	37	85	117	47	70.3333	19	96	1	12	5.6	4.83	195	14	5	3.7	0.9	0	2	0
465	1	1	36.9	101	153	106	121.667	20	100	2	2	16	4.14	247	11.9	4	3.5	0.6	4	1	0
466	0	3	36.9	76	125	71	89	20	100	1	1	13.2	4.76	287	13.9	14.4	5.9	7.5	0	0	1
467	0	4	36.9	77	142	85	104	20	99	2	16	13.6	3.04	90	8.1	6	4.8	0.9	0	1	0
468	1	7	36	86	86	42	56.6667	17	92	2	1	27.3	3.83	168	10.6	16	4	1.5	6	2	0
469	0	3	36.1	100	120	81	94	16	90	4	38	9.2	3.99	139	10.9	8	3.6	1.9	0	1	0
470	0	1	36.9	127	102	60	74	26	98	4	1	7.7	5.17	336	13.9	13.8	4.4	1.9	4	2	0
471	0	3	36.5	65	183	73	109.667	16	100	2	1	7.4	4.57	273	12.1	7	4	0.6	3	1	0
472	0	3	37.1	75	150	90	110	26	98	2	2	8.6	4.34	134	13	13.4	4.4	0.8	6	0	0
473	0	2	36.6	82	116	78	90.6667	18	100	1	0	15.3	4.6	221	13.6	5	5	5.1	3	2	0
474	0	3	37.1	101	163	111	128.333	20	94	2	4	14.7	4.62	360	12.9	13.8	5.8	7.8	3	0	1
475	0	2	37.5	89	141	89	106.333	20	99	1	6	12.8	4.19	443	7.2	18	3.7	0.5	6	1	0
476	1	4	38.4	113	131	95	107	22	95	7	0	7.6	4.64	202	14.5	12.7	3.7	0.7	3	1	0
477	0	4	37.6	72	134	79	97.3333	12	96	0	2	14.6	4.96	291	15.1	9	3.6	1.1	6	1	0
478	0	3	37.1	90	132	74	93.3333	18	99	1	0	13.9	4.66	296	12	17	3.7	1.3	0	1	0
479	0	3	36.4	76	99	54	69	16	99	2	19	12.5	5.16	379	15.3	14.4	3.6	1.5	3	4	0
480	0	5	37	67	156	98	117.333	18	96	1	0	12.8	3.82	297	11.4	8	4	15.4	0	2	0
481	0	5	37	67	156	98	117.333	18	96	1	0	8.8	4.17	339	11.3	13.2	4	0.6	3	1	0
482	0	5	36.7	92	156	98	117.333	22	95	3	22	14	4.44	220	13.4	13.7	4.1	1.1	3	5	0
483	0	6	37	78	176	83	114	23	99	2	1	15.7	4.91	328	14.5	12.8	4	0.9	3	0	0
484	0	4	36.4	67	158	82	107.333	29	96	2	3	16	5.02	345	14.8	12.1	4.2	1.2	3	1	0
485	0	4	37.2	98	149	86	107	19	97	3	13	6.1	5.19	454	13	14.4	4	1.2	3	0	1
486	0	2	36.7	105	95	49	64.3333	43	77	8	11	9.4	4.49	265	11.2	15.8	4.6	5.8	3	1	1
487	0	5	37.2	71	154	82	106	23	98	3	19	12.6	4.35	260	14	7	4.2	0.7	6	1	0
488	1	3	37.5	86	136	85	102	16	100	1	2	22.9	3.45	387	11.3	7	4.2	0.7	3	2	0
489	1	5	37.9	83	152	72	98.6667	11	97	0	2	7.5	4.44	248	12.8	13.3	3.3	0.8	6	1	0
490	0	1	37.6	93	125	75	91.6667	15	100	1	7	18.7	3.91	432	10.8	7	3.9	0.8	3	0	0
491	1	2	37.8	96	127	71	89.6667	20	97	2	7	9	4.77	195	13.8	13.5	3.3	1.2	3	1	0
492	1	1	37	70	115	64	81	13	100	3	20	7.5	3.89	209	12.7	13.4	4.4	1.2	3	2	0
493	0	4	37.4	71	108	65	79.3333	15	98	1	1	13.4	3.27	200	9.9	4	4.6	1.1	3	1	0
494	1	3	37.1	85	126	86	99.3333	32	100	3	0	6	3.97	223	10.9	16.7	4	0.7	6	0	0
495	0	7	36.6	70	132	82	98.6667	16	100	1	2	5.1	4.32	202	13.7	13.2	4.2	5.5	3	2	1
496	0	6	35	0	0	0	0	0	0	10	0	15.8	4.3	92	12.1	13.7	3.3	0.7	6	1	1
497	1	5	35.8	60	80	52	61.3333	15	94	3	4	7.2	3.74	207	8.8	14.9	4.5	5.7	3	0	1
498	0	4	37.1	77	166	93	117.333	18	94	1	0	13.2	3.95	139	11.3	8	4.4	1.8	0	2	0
499	1	4	36.9	74	112	75	87.3333	19	95	2	0	10.8	5.06	254	14.9	13.5	3.5	1	6	1	0
500	1	4	36	75	107	62	77	28	98	2	2	20.9	4.51	306	12.6	6	4.1	0.6	4	1	0
501	0	3	36.8	109	159	100	119.667	18	95	3	1	9.4	4.79	239	14.2	12.3	4.4	1.1	3	1	0
502	1	2	36.7	68	123	67	85.6667	16	100	1	2	5.1	3.31	177	8	16	4	1.5	0	5	0
503	0	1	37.5	86	132	85	100.667	23	96	2	62	18	3.89	414	10.8	13.9	4.2	0.6	0	0	0
504	0	6	35.3	99	197	91	126.333	16	95	2	0	11.4	3.9	196	13.1	6	4.3	0.8	0	2	0
505	0	5	37	102	132	92	105.333	19	100	2	2	9.3	4	153	12.4	14.9	3.6	1.3	3	2	0
506	0	2	37.1	91	156	98	117.333	29	94	2	21	12.9	3.93	112	11.5	14.5	3.8	0.9	3	1	0
507	0	3	37.4	81	127	85	99	20	100	1	2	13.3	2.67	86	7.9	7	3.9	0.7	3	1	0
508	1	2	36.9	95	103	73	83	18	96	3	7	15.1	5.03	142	15.4	8	3.8	0.9	0	1	0
509	0	4	36.7	65	114	76	88.6667	17	98	1	0	9.1	4.89	285	14	13.7	4.1	0.7	3	1	0
510	0	5	39	71	144	85	104.667	18	99	3	0	7.7	3.61	152	10.5	14.7	4	0.9	3	1	0
511	1	5	37.8	87	127	92	103.667	46	92	3	1	11.8	4.09	243	10.8	14.6	3.9	1.7	3	1	0
512	0	4	36.6	91	119	72	87.6667	19	100	1	106	18.8	4.82	215	14	14.3	4.8	1	3	1	0
513	1	4	37.5	102	161	97	118.333	35	97	7	5	10.4	3.43	315	9.9	14.8	4.2	1.1	6	1	0
514	0	3	36	58	80	56	64	10	49	5	5	7.9	4.51	222	13.7	18.8	4.1	0.7	3	1	1
515	0	3	36.8	79	136	75	95.3333	18	100	2	3	18	2.81	309	8.1	18	5	0.5	0	1	0
516	0	4	36.1	110	148	99	115.333	19	100	4	55	6	4.66	86	14.9	14.4	3.5	1.2	3	5	0
517	0	4	36.8	104	123	73	89.6667	19	95	2	26	28.8	5.43	347	17.5	4	3.3	0.7	3	1	0
518	0	1	36.5	79	121	75	90.3333	18	100	1	173	6.3	4.43	209	12.9	13.6	4.3	1.1	4	0	0
519	0	4	37	98	142	88	106	18	95	1	2	18.4	2.83	134	8.7	8	4.2	0.7	0	0	0
520	0	2	37.8	100	180	126	144	12	95	0	1	15.5	3.98	236	12	13.7	4.1	1.3	6	1	0
521	1	3	36.7	97	137	89	105	24	98	4	11	8.1	2.96	296	8.2	16.2	4	2	3	1	0
522	0	5	35.3	73	131	81	97.6667	17	87	1	7	18.1	5.15	221	15.7	13.1	4.2	5.8	3	1	1
523	0	1	37	98	171	100	123.667	25	100	2	9	10.9	3.25	589	9.9	13.2	4.8	0.6	4	1	0
524	0	6	35.7	58	163	82	109	11	97	0	17	10.6	3.3	226	8.9	15.1	3.2	1.2	3	5	0
525	1	2	37.3	95	140	85	103.333	20	97	1	4	6.8	4.32	111	13.1	15	4	0.7	0	5	0
526	0	3	37	79	101	65	77	26	99	2	5	13.1	3.32	31	9.5	8	4	2.1	3	1	0
527	1	4	36.5	92	172	106	128	19	95	3	4	16.4	3	203	8.8	4	3.9	0.6	3	1	0
528	1	5	37.2	83	158	94	115.333	15	100	1	1	8.7	4.42	224	14.5	4	3.8	1.3	3	1	0
529	0	4	36	58	73	51	58.3333	17	98	3	2	6	2.29	150	7.6	15.3	4	10.2	3	1	0
530	0	3	36.2	102	114	84	94	20	100	2	4	6.7	4.69	284	13.5	12.6	4.5	0.8	3	4	0
531	0	2	33.7	101	92	57	68.6667	23	100	6	40	7.8	3.25	373	9	20	3.9	4.5	6	1	1
532	0	2	37.1	74	162	93	116	16	100	1	3	6.7	4.06	396	13.1	12.5	3.8	1.1	3	1	0
533	0	4	37.4	90	137	99	111.667	19	89	1	5	18.2	2.79	1592	6.9	15.1	4	1.6	3	2	0
534	0	4	36	88	144	94	110.667	20	99	1	3	15.8	3.02	183	9	16.8	4	2.1	3	1	0
535	0	1	37.2	79	131	96	107.667	15	100	1	2	8.7	4.28	282	12.9	13.5	3.7	1.1	0	2	0
536	0	2	37.3	93	110	82	91.3333	18	97	1	67	1	2.66	115	7.9	9	4.1	0.8	3	1	0
537	0	5	36.3	66	100	60	73.3333	17	98	2	1	14.5	3.76	186	11.1	4	4.7	1	3	2	0
538	0	2	36	80	144	113	123.333	18	100	1	6	7.6	3.28	160	8.3	17.6	4.4	1.1	6	2	0
539	0	3	37.6	97	136	78	97.3333	20	97	1	0	9.6	4.22	275	13.6	13	5	9.8	0	2	0
540	1	4	37	80	153	91	111.667	16	98	2	3	8.1	5.87	201	17.8	12	3.8	0.7	6	1	0
541	0	3	36	71	95	59	71	18	97	2	19	46.8	4.16	251	11.9	13.8	4.7	0.6	3	1	0
542	0	6	37.3	97	178	68	104.667	29	94	4	22	5.2	4.11	155	12.1	15	3.6	1.4	0	2	0
543	1	7	37.3	98	170	79	109.333	17	96	1	20	12.6	4.99	220	15.1	6	3.7	1.1	3	2	0
544	0	3	36.9	77	138	94	108.667	19	99	1	32	11.4	3.63	165	11.9	13.9	4.7	1	0	5	0
545	0	1	36.8	102	127	79	95	16	97	2	2	20.3	5.32	146	16.9	13.2	5	1.3	3	2	0
546	1	4	34.3	104	103	86	91.6667	20	89	5	0	7.5	3.98	168	11.2	14.4	3.6	0.6	6	5	0
547	1	5	36.4	87	139	89	105.667	15	100	3	2	3.6	2.4	209	7.8	15.3	4.3	3.9	3	2	1
548	0	2	36.4	77	149	99	115.667	12	100	0	25	13.5	4.56	227	15.4	12.9	3.7	1	4	2	0
549	0	3	37.3	100	130	84	99.3333	16	96	1	1	10.8	4.21	186	12.2	13	3.5	0.6	5	1	0
550	1	6	37.3	71	167	74	105	20	100	1	6	17.2	3.98	149	12.1	13.3	4.3	1.1	6	2	0
551	0	6	36.4	70	38	28	31.3333	10	80	4	21	6.2	4	179	10.1	15.3	3.4	0.8	6	1	1
552	0	5	36	94	118	61	80	19	95	1	3	9	5.11	249	14.4	13.5	3.8	1	3	2	0
553	0	2	35.6	66	117	65	82.3333	20	98	1	25	7.7	3.96	115	13.2	14.7	4.2	1.8	4	0	0
554	0	5	36.7	74	155	84	107.667	17	100	1	90	7.7	4.08	72	12.9	15.9	3.8	1.4	0	2	0
555	1	5	37	72	111	67	81.6667	19	95	1	0	8.4	4.28	238	12.7	13	4	1.9	0	2	0
556	0	6	38.2	95	173	101	125	20	100	1	0	7	4.34	185	13.8	12.2	5	0.9	0	2	0
557	0	4	36.3	67	135	93	107	21	100	2	6	9.6	4.45	271	13.8	11.7	4.6	0.9	6	1	0
558	0	5	36.3	61	101	69	79.6667	14	96	1	0	7	3.96	111	13.5	13.2	4.4	0.9	3	1	0
559	1	5	37.9	80	143	70	94.3333	19	98	1	0	14.2	3.99	468	12.1	15.6	3.9	3.5	6	1	0
560	0	1	37.8	90	136	62	86.6667	19	98	1	2	19.4	3.08	397	8.9	9	2.9	4.5	6	2	0
561	1	2	36.8	98	161	140	147	21	98	3	1	14.9	3.85	194	11.6	14.5	3.5	0.5	0	5	0
562	0	5	36.6	81	171	100	123.667	16	95	1	0	5.4	3.12	232	8.7	7	3.5	0.7	3	1	0
563	0	4	37.3	72	118	87	97.3333	18	95	3	2	11.4	4.88	265	12.8	6	4.2	0.9	3	2	0
564	0	4	37	85	149	111	123.667	20	97	3	2	16.2	4.19	278	10.7	17.1	3.8	1.1	3	1	0
565	0	4	36.7	91	119	77	91	20	97	2	0	8.4	4.1	252	11.9	13.8	4.5	0.8	6	2	0
566	0	3	37.7	102	132	97	108.667	24	86	3	0	12.1	3.71	112	12.6	12.7	4.5	1.5	3	2	0
567	1	3	34.8	71	93	34	53.6667	20	100	4	2	10.1	4.03	244	10.7	8	3.7	1.6	6	2	0
568	0	1	36.3	150	133	79	97	35	85	7	1	35.9	2.58	6	7.8	16.7	3.6	0.7	6	2	1
569	0	1	37.3	101	121	72	88.3333	23	98	3	0	13	4.16	418	13.1	12.3	4.2	1.4	6	2	0
570	1	5	38.1	123	138	88	104.667	19	96	3	15	14.4	4.83	187	15.2	13.2	3.6	1	6	2	1
571	0	6	36.4	72	198	96	130	25	92	3	4	13.2	3.74	154	12.2	13.6	3.6	0.7	3	2	0
572	0	5	35.8	76	147	83	104.333	20	96	1	1	11.4	4.96	321	14.9	6	4	1.5	6	2	0
573	1	5	37.4	53	102	65	77.3333	21	100	2	5	7.6	4.43	205	12.6	13.9	4.3	1.2	3	4	0
574	0	2	36.9	65	132	79	96.6667	20	100	1	66	30.3	4.46	305	13.7	12.2	4	0.9	6	2	0
575	0	3	37	66	131	81	97.6667	16	99	1	5	11.4	5.53	159	15.6	13.6	4.2	0.8	5	2	0
576	0	3	38.1	111	104	59	74	17	98	3	1	13.5	4.13	421	14	3	3.2	0.5	0	1	0
577	0	3	36	63	164	86	112	19	97	1	37					9	3.9	0.7	3	5	0
578	1	3	36.9	78	142	97	112	18	95	2	0	6.5	3.21	232	10.9	14.9	4	10.9	3	4	0
579	0	2	34.2	120	81	41	54.3333	10	97	5	6	17	3.26	377	9.5	7	4.5	3.8	0	1	0
580	0	6	37.8	98	175	86	115.667	20	100	1	0	12.9	3.99	178	12.9	5	3.8	0.7	3	0	0
581	1	1	37.1	77	126	88	100.667	15	98	1	1	14.8	3.77	274	11.1	13.5	3.8	0.8	6	0	0
582	0	4	36.8	89	136	91	106	20	100	1	5	6.9	4.17	226	12.6	15.6	3.8	1	3	1	0
583	1	2	38	111	118	70	86	21	96	6	61	11.9	2.74	162	8.4	15.5	8.1	7.5	3	0	1
584	0	1	36.6	85	152	97	115.333	13	95	1	0	6.9	4.73	183	15.1	14.2	4.1	0.7	5	2	0
585	1	4	35.5	123	62	26	38	27	90	7	14	15.5	5.09	212	12.3	19.3	4.8	6.5	3	1	1
586	1	6	35	120	75	40	51.6667	30	78	8	10	29.3	4.17	391	13	15.5	4.9	3.7	0	2	0
587	0	4	36.8	86	130	60	83.3333	15	96	2	20	22.3	4.65	153	15.2	12.7	3.2	1.1	6	1	0
588	1	4	37	66	119	81	93.6667	12	100	0	0	8	3.7	156	11.7	8	3.6	1.8	3	2	0
589	1	6	37.1	99	150	96	114	26	99	3	49	10.4	3.42	249	11.5	7	4.5	1.5	3	2	0
590	1	7	36.8	79	163	90	114.333	21	95	4	2	10.9	4.37	329	14	13.4	4.4	1	3	1	0
591	0	5	36	80	159	66	97	26	92	3	2	11.3	3.7	353	12.7	13.7	4	0.6	3	5	1
592	0	5	36.6	71	176	81	112.667	19	99	2	1	13.8	4.54	301	13.1	14.8	4.6	1.5	3	5	0
593	1	4	38.3	96	131	64	86.3333	19	97	3	0	10.5	4.01	289	13.3	5	3.5	0.8	6	2	0
594	0	3	36	57	169	92	117.667	20	100	3	0	11.4	4.08	258	11.8	16.4	4.3	0.6	5	2	0
595	0	3	37.3	60	140	86	104	17	98	1	1	15.4	4.34	207	14	13.5	4.5	0.7	0	2	0
596	1	5	36.4	88	177	110	132.333	19	98	2	1	6	3.92	161	11.5	14	4.1	0.8	0	0	0
597	1	6	35.4	61	139	123	128.333	0	84	5	3	6.7	4.3	291	13.3	13	4.4	0.8	3	5	1
598	0	4	37	74	137	75	95.6667	20	100	4	1	10.1	5.49	240	15.4	13.2	4.9	0.6	3	1	0
599	0	3	37.1	97	136	91	106	23	96	2	3	12.6	5.05	306	14.7	14.2	4	0.8	3	1	0
600	0	2	36.9	75	146	93	110.667	18	95	1	2	13.3	4.95	158	13.6	12.9	3.8	1.1	3	2	0
601	0	4	37.7	83	187	96	126.333	21	97	2	108	8.5	3.17	148	9.6	15.6	3.6	1.1	6	4	0
602	0	3	36.3	86	143	107	119	20	100	3	44	9.8	3.96	157	11.9	12.5	3.9	0.9	0	2	0
603	1	5	36.7	88	151	101	117.667	28	100	3	16	7.6	4.89	244	14.7	12	3.8	0.8	3	2	0
604	0	3	38.1	112	127	86	99.6667	19	99	3	1	7.4	4.39	258	12.4	13.4	4.5	0.7	6	1	0
605	0	6	37	88	148	75	99.3333	29	96	4	1	8	4.19	184	12.6	14	4.1	1	3	2	0
606	0	2	36.6	137	156	88	110.667	37	84	7	18	12.1	3.35	100	9.3	15.4	4.6	1	0	4	0
607	0	3	35.5	76	158	75	102.667	26	85	5	89	9.8	3.88	169	11.4	12.6	4.1	1	6	2	0
608	0	3	36.5	75	132	94	106.667	20	100	1	5	6.5	5.08	206	15.2	13.2	4	1.1	3	0	0
609	1	5	35.7	96	89	51	63.6667	25	85	5	20	16.1	3.78	162	10.8	13.5	6.9	0.8	6	1	1
610	0	1	38.5	137	134	87	102.667	23	99	7	7	12.6	5.68	331	13.7	18.2	6.2	6.5	3	0	1
611	1	5	36.9	64	149	91	110.333	22	99	2	19	8	3.14	236	9.6	15	4.3	4.6	3	0	1
612	0	5	36.4	58	148	81	103.333	18	91	3	2	7.3	3.54	279	11.5	9	3.9	0.9	3	1	0
613	1	4	36.1	116	188	95	126	30	92	5	46	12.6	4.48	235	13.6	6	3.5	0.9	4	1	0
614	0	5	35.9	144	101	75	83.6667	25	89	2	13	9.5	4.63	126	14.3	12.4	3.7	0.9	3	2	0
615	0	2	37	94	140	87	104.667	19	95	1	0	6.7	4.04	186	11.4	15.8	3.4	1	3	1	0
616	0	2	36.8	108	133	104	113.667	20	93	3	21	12.1	5.22	266	16.9	13.4	4	0.9	3	2	0
617	0	4	37.5	69	177	88	117.667	17	98	1	1	21.5	3.08	413	10.2	8	3	1.5	3	2	0
618	0	5	37	100	153	99	117	18	100	1	54	11.6	4.48	314	13.9	13.7	4.4	0.8	3	2	1
619	0	3	36.9	79	145	94	111	22	99	2	10	8	4.05	189	12.6	13.6	3.8	0.7	6	0	0
620	1	5	36.9	91	204	96	132	17	96	3	23	15.9	4.31	492	12.6	14.3	3.8	0.6	3	1	0
621	0	3	38.4	98	161	88	112.333	18	95	3	0	14.4	2.3	300	7	16.7	4.4	1.2	3	2	1
622	0	3	36.8	82	157	87	110.333	24	98	5	54	7.5	4.74	261	13.9	6			6	4	0
623	1	6	37.4	95	110	59	76	30	77	3	51	11.3	4.52	209	13.4	13.6	3.6	0.5	3	2	0
624	1	4	35	81	89	69	75.6667	35	80	4	171	16.4	3.02	169	9	19.8	5.5	6.5	3	2	1
625	0	2	36	102	134	119	124	16	98	2	7	13.6	4.59	344	13.8	13.5	4.1	0.6	3	5	0
626	0	1	37	80	123	74	90.3333	22	100	2	5	8.7	4.72	263	13.9	11.9	4.6	0.8	5	5	0
627	0	5	37.2	85	130	85	100	20	99	1	99	9.9	3.9	266	9.2	6	4.1	1.6	4	5	0
628	0	1	38.4	121	131	73	92.3333	15	100	5	22	11.6	3.6	364	9.4	15.7	3.4	0.7	6	5	1
629	0	3	36.5	84	176	146	156	29	98	5	0	7.5	4.25	162	13.7	14.4	4.4	1.4	3	1	0
630	0	2	37	113	138	93	108	20	99	3	1	11.6	4.38	285	13	13.5	4	1	3	4	0
631	0	5	37.3	69	182	93	122.667	16	96	1	503	6.1	3.43	140	10.1	13.7	4	1.5	6	2	0
632	0	6	36.5	87	184	95	124.667	19	94	3	30	14.9	3.93	153	11.9	9	3.7	0.9	0	1	0
633	0	4	38	71	126	60	82	13	97	0	17	17.8	3.06	324	8.9	15	4.4	1.4	6	2	0
634	1	1	37.8	76	120	81	94	18	99	1	3	17.2	5.06	222	15.5	13.7	3.7	0.8	0	1	0
635	0	5	36.2	100	97	69	78.3333	25	95	3	1	5.4	4.54	200	14.6	14.5	4.2	0.9	6	0	0
636	0	1	36.4	140	141	90	107	30	100	6	3	37.5	3.59	425	11.9	8	4.3	2	3	1	0
637	1	4	37.8	97	129	83	98.3333	15	100	3	2	10.1	4.92	217	14	15.1	5	1	3	4	0
638	0	5	36.1	77	149	76	100.333	16	96	2	2	9.1	4.96	262	15.1	6	3.5	0.8	3	2	0
639	1	4	38.1	87	102	75	84	16	98	1	32	13.5	2.98	128	9.5	15.4	3.2	0.4	3	2	0
640	0	2	37.8	76	122	66	84.6667	16	95	1	4	10.9	4.65	373	14.6	16.3	3.2	1.1	6	5	0
641	0	2	36.8	79	109	75	86.3333	18	96	2	10	18.9	4.87	187	14.7	14	3.1	0.8	6	5	0
642	0	1	36.5	95	108	62	77.3333	20	100	1	37	6.8	4.37	157	15.3	13.6	4.7	0.7	3	0	0
643	0	3	38.8	105	109	76	87	21	100	5	1	9.2	4.77	247	13.4	13.7	3.6	1.2	6	2	1
644	1	5	37.5	62	99	46	63.6667	30	99	5	41	6.3	4.3	234	12.8	14.9	4.1	0.7	3	1	1
645	0	1	37.8	97	148	75	99.3333	14	98	0	17	3	3.05	40	8.4	15.1	4	5.3	6	2	0
646	0	1	37.4	112	114	75	88	20	96	3	19	16.7	4.26	251	13.3	12.5	5	0.9	3	1	0
647	0	1	37.3	81	132	114	120	19	98	1	0	7.4	4.84	130	13.7	8	3	0.5	0	5	0
648	0	1	36.3	105	146	99	114.667	25	95	3	37	13.7	4.51	427	12.5	12.8	3.4	0.9	0	1	0
649	1	2	36.5	72	123	76	91.6667	15	98	1	26	11.4	5.11	162	16.3	11.9	5	1.1	3	1	0
650	0	4	36.3	80	159	99	119	20	99	1	2	17.6	5.1	531	13.1	14.1	4.4	0.9	3	1	0
651	1	1	37	135	137	75	95.6667	25	96	5	50	21.5	3.78	292	11.5	12.4	3.8	0.7	6	0	1
652	0	1	36.3	78	141	72	95	15	96	1	6	25.1	3.61	420	9.8	8	4	0.6	3	2	0
653	0	1	37.7	125	139	74	95.6667	26	95	6	11	27.2	4.78	256	11.5	20	5.8	5.6	3	0	1
654	0	3	37.9	122	105	57	73	37	97	5	50	19.2	2.77	164	8.8	14.6	4	3.7	3	0	0
655	0	5	36.6	71	170	90	116.667	20	98	2	0	17.3	3.33	148	8.6	8	3.5	1.8	0	1	0
656	1	3	37.3	63	128	69	88.6667	23	100	3	0	6.7	2.98	246	9.4	16.6	5.1	3.9	1	1	0
657	1	1	36.2	72	118	78	91.3333	19	98	1	23	7.1	4.08	308	10.2	7	4	7	3	1	0
658	0	5	37	87	149	64	92.3333	25	99	2	3	11.6	4.9	291	12.4	6	4.7	1.3	1	1	0
659	0	5	37.3	86	160	85	110	18	99	1	4	9.6	4.3	184	12.1	14.6	4.3	1.1	3	2	0
660	0	4	37.3	79	120	69	86	24	99	2	0	13.3	4.92	200	15.1	12.8	3.8	0.9	0	1	0
661	0	4	36.9	78	161	115	130.333	25	91	5	24	8.2	2.98	157	7.6	17.7	5.4	5.3	3	2	1
662	0	6	36.8	59	148	85	106	18	95	1	0	9.9	3.49	261	10.7	13.5	4.6	0.8	1	0	0
663	0	4	38.3	97	114	66	82	18	99	1	2	7.7	5.74	305	17	12.5	4.3	1.4	1	0	0
664	1	4	38.7	135	155	88	110.333	34	90	10	0	26.5	4.84	410	12.7	14.2	3.1	0.9	1	1	1
665	1	3	38.1	122	130	99	109.333	27	100	4	2	19.9	3.32	136	10.3	14.9	4	2.7	5	1	0
666	0	2	36.1	115	127	77	93.6667	25	99	7	16	10.3	5	237	14.4	14.2	4	1.1	3	1	0
667	1	6	37	67	140	59	86	18	96	1	1	15.7	3.73	482	9.5	17	3	5.2	3	0	0
668	1	4	36.7	90	215	131	159	20	99	4	2	5.5	3.58	272	10.6	3	4.2	1	3	0	0
669	1	4	36.7	61	100	66	77.3333	16	99	2	16	6.6	4.16	212	12.5	12.9	4.6	0.6	3	2	0
670	1	3	38	78	103	63	76.3333	19	96	1	19	9.1	5.24	140	14.8	14.6	4.4	1	0	1	0
671	0	4	36.7	75	142	89	106.667	17	100	1	24	7.7	4.77	164	13.2	14.4	3.3	0.9	1	1	0
672	0	2	36.7	100	141	99	113	25	100	2	1	13.7	4.06	143	13.1	13.1	4.4	1.1	3	1	0
673	0	2	36.8	89	130	80	96.6667	20	98	1	15	5.9	2.92	126	8.5	14.6	3	1.1	1	2	0
674	0	4	37	84	103	76	85	28	96	5	6	10.3	3.05	119	9.7	12.1	4.6	1.4	3	1	0
675	1	7	37.2	87	168	88	114.667	17	95	3	8	12.2	5.86	177	18.4	7	4	1.6	0	2	0
676	0	3	37.1	44	148	76	100	20	98	3	2	11.7	4.09	213	12	5	4.2	0.6	1	1	0
677	0	4	36.7	100	150	138	142	32	97	4	8	10.6	4.49	232	12.8	16.5	4.6	5.3	3	5	1
678	0	5	35.9	82	139	96	110.333	18	99	2	9	6.4	4.16	139	11.9	12.2	3.8	1.1	3	2	0
679	0	4	37.1	66	161	95	117	22	99	4	2	9.9	4.83	178	15.4	14	4.5	0.8	3	2	0
680	0	5	37.2	106	123	73	89.6667	18	99	2	2	8.9	3.67	200	11.3	14.7	4.1	0.9	3	1	0
681	0	3	37.6	81	134	91	105.333	29	96	2	4	8.6	4.58	188	13.3	8	3.7	1.1	3	1	0
682	0	4	36.4	65	120	68	85.3333	17	95	1	4	10.5	3.4	199	9.3	17.5	5.6	5.9	3	1	1
683	1	3	37.8	80	118	74	88.6667	18	99	1	17	10.3	4.51	146	13.5	12.5	4.9	0.7	1	1	0
684	1	5	36.8	103	95	67	76.3333	23	91	5	17	26.1	2.72	92	9.4	21.3	5.9	5.5	3	1	1
685	0	7	36	46	99	57	71	26	98	4	2	9.7	3.12	80	10.1	13.6	4.5	2.3	3	0	0
686	0	5	37.7	99	152	94	113.333	20	98	1	2	5.7	3.09	146	10.4	8	4.5	3.1	0	4	0
687	1	5	37.8	87	130	85	100	35	96	3	13	7	3.3	199	10.1	6	3.8	0.6	4	1	0
688	1	5	37.6	107	132	73	92.6667	20	82	2	20	8.7	4.56	295	13.5	12.2	4.1	0.8	0	1	0
689	0	2	36.7	115	126	85	98.6667	20	100	3	10	8.3	2.83	191	8.5	13.6	3.9	0.6	3	1	0
690	0	5	37	74	132	65	87.3333	14	98	0	2	11.6	3.2	288	10.1	17.4	4.3	0.7	3	2	0
691	0	3	36.7	83	101	69	79.6667	20	93	1	30	20.3	5.11	348	16.3	8	3.6	0.9	0	2	0
692	0	0	37.5	85	157	80	105.667	14	99	0	7	9.4	4.18	164	12.7	11.9	4.2	0.7	3	2	0
693	0	3	36.6	84	161	101	121	20	96	1	19	21.7	2.39	293	7	18.9	5	4.2	1	1	0
694	0	3	36.5	71	213	122	152.333	20	97	3	28	19.5	4.4	235	14.2	13.9	5.6	6.5	3	1	1
695	0	4	36.7	69	148	78	101.333	36	100	3	2	249.5	2.94	52	8.6	8	2.5	0.7	3	1	0
696	0	5	37	70	128	62	84	12	96	0	1	9.6	4.85	376	14.7	13.5	3.4	0.7	1	1	0
697	1	6	36.2	82	119	60	79.6667	16	97	2	29	7	4.76	147	14.8	7	4.8	1.1	3	5	0
698	0	4	36.5	88	109	71	83.6667	17	97	1	29	23.7	2.5	316	7.8	12.7	4	3.1	3	2	0
699	0	3	37	85	138	95	109.333	20	100	1	10	7.8	2.96	183	9.8	13.2	4	1.6	3	5	1
700	0	2	37	82	128	85	99.3333	20	96	1	10	20.7	4.32	250	13.4	5	3.5	0.6	3	1	0
701	0	3	36.7	72	132	67	88.6667	16	99	1	4	8.3	4.34	114	13.3	13.9	4	1.4	5	1	0
702	1	5	37	68	130	80	96.6667	17	98	1	47	16.7	3.18	138	7.9	18	3.7	0.4	3	1	0
703	1	1	37.4	122	122	65	84	15	100	3	40	0.3	2.65	42	8.1	7	3.8	0.4	5	1	0
704	0	3	36.6	84	159	95	116.333	23	98	3	0	5.9	3.81	308	12.3	16.2	4.3	1	0	1	0
705	0	3	36.6	84	159	95	116.333	23	98	3	14	9.6	2.78	174	8.2	18.6	3.9	3.6	5	5	0
706	0	2	37.1	98	160	91	114	20	95	1	26	10.6	4.04	190	12.4	6	2.6	0.5	5	0	0
707	0	4	37.8	97	167	114	131.667	24	98	2	25	8.1	4.37	233	13.4	14.3	3.6	0.7	0	1	0
708	1	7	38.4	114	101	68	79	16	99	3	27	8.3	4.5	52	13.2	13.7	4.8	1.2	5	1	0
709	0	1	37.3	114	128	68	88	30	98	5	12	12.1	3.57	176	10.5	13.5	3.9	0.9	3	0	0
710	0	6	36	60	178	56	96.6667	20	96	1	3	14.3	4.06	177	12.7	13.5	3.3	0.8	3	1	0
711	1	6	36.5	75	189	88	121.667	20	99	3	2	16.2	4.02	212	12.1	14	4	1.2	3	1	0
712	0	4	38	97	126	85	98.6667	18	99	1	2	13.5	2.63	199	8	15.8	4	0.7	3	5	0
713	0	1	35.2	86	110	60	76.6667	19	99	3	15	3.9	4.13	180	13.2	13.8	3.9	1.2	3	1	0
714	0	4	39	74	124	80	94.6667	30	96	5	0	18.4	4.45	265	12.7	13.7	4.7	1.4	3	0	0
715	1	5	36.9	92	160	101	120.667	21	97	2	53	7.3	4.31	24	13	13	3.5	0.8	5	1	0
716	0	5	37.5	72	142	88	106	12	100	0	2	1.5	3.3	146	10.2	15.7	4.8	14.8	3	0	0
717	1	4	36.7	88	148	91	110	16	100	1	26	7.6	2.29	85	7	15.8	3.7	1.2	5	1	0
718	0	6	37.7	136	162	82	108.667	22	93	7	26	11	3.91	189	11.3	14.5	4.7	1.1	3	5	1
719	0	3	38.1	94	115	68	83.6667	18	98	1	19	9.3	2.89	773	8.3	16.2	2.2	0.3	3	1	0
720	1	6	36.8	121	114	82	92.6667	23	77	4	9	7.2	5.06	156	15.2	12.7	4.6	0.8	3	0	0
721	0	1	37.1	72	151	87	108.333	16	98	1	39	7.8	4.33	249	12	14.2	3.7	1	3	4	0
722	0	2	36	108	80	50	60	25	91	5	21	10.5	2.64	249	7.3	15.4	4.2	3.3	3	1	1
723	0	6	36.6	70	151	86	107.667	40	97	4	4	7.1	3.91	304	9.2	18.3	4	1.4	0	2	0
724	0	4	37.1	79	104	79	87.3333	20	97	1	1	7	4.19	269	10.8	13.8	4	2.3	3	0	0
725	0	3	36.3	84	124	88	100	15	99	2	7	15.1	4.16	128	13.8	11.9	2.8	1.2	5	1	0
726	0	5	36.6	84	139	87	104.333	33	100	4	1	11.2	4.18	178	13.6	13.5	3.8	1.1	3	1	0
727	1	5	37.8	87	115	69	84.3333	18	98	1	3	9	4.23	276	11	19.4	4	0.8	3	1	0
728	1	6	37	79	133	91	105	21	96	2	35	7.9	3.47	155	11.1	15.3	3.8	2.3	3	0	0
729	0	2	37.6	76	147	105	119	18	98	1	2	9.3	3.02	345	8	17.9	4.9	1.6	0	1	0
730	0	4	36.6	87	156	98	117.333	20	97	2	50	10.1	3.08	235	9.5	12.9	4.1	1.1	3	1	1
731	0	3	36.5	73	110	61	77.3333	27	98	2	5	5.9	3.67	177	11.1	12.6	4	1.4	5	1	0
732	0	5	37	84	167	102	123.667	18	96	1	19	2.1	3.29	101	9.1	13.2	3.6	0.8	3	5	0
733	1	4	37.7	84	130	76	94	16	98	2	7	14.6	4.9	252	15.3	12.3	3.8	0.6	3	0	0
734	0	3	38	70	161	83	109	27	95	2	3	9.5	4.34	193	13.8	16	4.4	1.9	5	1	0
735	0	1	37.1	109	130	83	98.6667	24	100	3	1	30.9	2.97	365	8.4	8	3.8	1.5	4	1	0
736	1	5	37.1	71	138	71	93.3333	19	99	1	4	6.2	2.68	219	8.7	15.6	4.7	6.2	5	1	0
737	0	4	37.6	76	186	106	132.667	14	95	0	50	2.9	3.07	127	9.5	13.9	3.1	0.7	3	1	0
738	1	4	36.5	78	140	65	90	26	100	2	1	36.8	2.31	91	6.8	14.6	4	1	3	1	0
739	1	5	37.6	98	140	83	102	20	100	1	6	14.2	3.65	313	10	14.1	4	0.5	5	1	0
740	0	5	37.9	90	130	71	90.6667	20	93	1	24	28.1	4.78	277	14.2	14.9	5	2	5	2	0
741	1	5	37.9	87	131	90	103.667	12	96	0	3	9.7	4.13	157	12.9	14	4	2.5	3	0	0
742	0	1	36.9	108	107	74	85	15	93	2	18	16.1	4.42	149	13.5	6	5	1.6	3	2	0
743	0	3	37.3	77	128	76	93.3333	22	95	2	6	10.2	4.59	255	14.6	14.1	3.9	0.8	3	1	0
744	1	3	36.4	93	123	85	97.6667	20	99	1	18	17.4	4.37	205	12.5	6	2.6	2.1	3	1	0
745	0	2	36.5	81	154	93	113.333	17	100	1	5	10.6	3.83	268	12.5	7	4.2	0.7	5	1	0
746	1	5	37.3	64	170	91	117.333	20	98	1	23	11.4	4.43	204	13.2	13.4	4.4	1.1	3	1	0
747	0	3	37.5	102	115	99	104.333	20	100	2	2	6.5	4.39	146	12.7	13.5	4.4	0.5	3	1	0
748	1	3	36	108	137	85	102.333	18	98	2	18	12.4	3.04	266	9.2	16.6	4.3	5.7	6	2	0
749	1	4	35.5	102	80	48	58.6667	29	94	7	29	13.9	4.18	356	12.9	17.6	3.8	0.9	5	1	1
750	0	4	35	81	89	69	75.6667	35	80	12	44	12.9	6.82	82	15.9	16.7	5	6.3	3	2	1
751	0	4	35.9	71	153	94	113.667	20	100	1	0	15.6	4.02	348	12.2	4	4.6	1.3	3	2	0
752	0	4	35.9	72	153	89	110.333	20	100	1	2	12.5	4.64	214	14.6	11.9	3.9	1.1	3	0	0
753	0	3	36.8	77	159	85	109.667	17	98	1	26	13.2	4.04	230	12.3	13.8	3.4	0.7	3	1	0
754	0	6	35.4	95	174	87	116	22	95	4	24	8.3	5.47	214	15.4	15.2	4	2	0	2	0
755	0	2	37	58	117	79	91.6667	18	98	1	33	13.7	5.03	272	14	6	4.3	0.7	5	4	0
756	0	2	37.2	119	96	59	71.3333	20	99	4	9	9.8	3.98	139	11.7	13.2	4	0.9	5	1	0
757	0	0	37	106	152	77	102	16	97	2	119	21.1	2.94	175	8.9	12.5	4	1	5	1	0
758	0	4	36.5	82	110	68	82	20	96	1	1	16.2	4.71	171	13.1	14.2	4.5	1	3	1	0
759	0	3	36.2	102	81	45	57	31	99	6	0	6.7	2.88	213	9	6	4.5	4.6	5	1	0
760	0	3	36.2	102	81	45	57	31	99	6	2	9.5	5.69	304	16.5	12.8	4.1	1.2	3	1	0
761	0	4	37.5	59	206	120	148.667	17	100	3	13	7.2	2.47	153	8.5	17	4.6	4.6	5	0	0
762	0	4	36.5	104	217	94	135	15	97	6	8	6.3	4.72	195	14	12.9	4.4	5.8	3	0	1
763	0	1	37.5	90	141	74	96.3333	22	100	2	26	10.3	4.41	297	13.9	7	4	0.5	3	1	0
764	0	1	37.6	97	131	70	90.3333	16	97	1	23	7.7	2.97	213	9.2	14.7	4.5	0.5	3	1	0
765	1	3	38.2	116	132	94	106.667	30	98	6	3	23.3	3.86	202	11.6	6	4	1.7	5	2	0
766	0	3	39.3	158	110	85	93.3333	30	97	10	3					26	5.9		5	1	1
767	1	5	38.4	80	158	81	106.667	18	98	1	2	5.8	4	212	13.6	13.1	5	1.6	0	0	0
768	0	5	37	96	99	64	75.6667	16	96	2	7	12.3	4.7	263	15.3	12.2	4.2	0.9	5	2	0
769	1	7	38.3	119	163	99	120.333	18	90	3	9	10.4	3.39	292	9.1	8	3.9	0.8	5	1	0
770	0	2	37.1	95	97	67	77	17	96	2	1	8.5	5.19	181	14.7	12.2	3.8	1	5	1	0
771	1	3	38	82	109	66	80.3333	20	99	1	6	8	2.87	239	8.2	13.2	4.5	1.3	3	1	0
772	0	4	36.1	48	225	95	138.333	17	97	6	38	7.4	2.6	209	8.1	18.5	3.9	0.7	5	0	1
773	0	2	37.1	74	139	90	106.333	20	99	1	23	13	4.51	408	14.8	13.1	4.3	1.4	3	2	0
774	1	2	37.8	94	97	72	80.3333	13	100	1	18	5.1	3.48	179	11.2	8	4.3	1	3	5	0
775	0	1	37	122	175	118	137	23	99	4	15	19.6	3.84	205	12.1	14.3	2.8	0.9	5	5	1
776	0	3	38.5	96	159	117	131	19	96	3	11	8.3	4.89	173	15.8	13.8	3.9	0.9	0	1	0
777	0	3	37.6	71	141	84	103	17	95	1	45	10.6	4.29	120	13.6	12.4	4	1	3	1	0
778	0	5	37	120	188	105	132.667	16	94	4	0	13.7	3.01	197	8	19.3	4.3	0.4	0	2	0
779	0	1	36.8	115	133	83	99.6667	24	99	4	0	12.3	4.7	391	14.5	6	3.9	0.7	0	0	0
780	0	4	37.1	72	105	64	77.6667	18	98	1	38	30.5	5.91	327	22.5	6	3.6	0.8	5	2	0
781	0	6	37.4	124	197	118	144.333	30	100	5	13	16.2	4.74	400	15.2	12.6	5.1	5.6	3	0	1
782	0	5	37.1	78	122	76	91.3333	20	95	1	2	7.7	4.14	181	12	14.6	4.2	1.1	5	2	0
783	1	3	36.9	92	128	80	96	20	100	1	12	6.5	4.3	215	13.5	12.8	3.6	1.3	3	4	0
784	0	4	37	74	129	81	97	18	99	1	6	8.7	4.12	202	10.4	15.6	4.3	0.9	5	1	0
785	0	4	37.1	89	164	78	106.667	20	98	1	5	6.5	4.23	445	11.4	15.8	4	0.9	3	1	0
786	1	5	36.7	66	153	107	122.333	13	97	2	44	9.4	3.9	186	13.8	14.6	3.9	1.3	3	1	0
787	0	4	36	73	154	95	114.667	20	98	3	6	10.2	5.41	204	14.7	7	4.1	0.7	5	1	0
788	0	3	36.6	86	125	61	82.3333	26	91	2	15	27.4	4.38	209	13.8	14.3	4.6	0.8	3	2	0
789	0	3	36.9	67	132	84	100	20	98	1	0	16.1	2.85	90	7.7	17.2	4.5	1.1	0	1	0
790	0	4	36.7	98	120	78	92	20	96	1	0	5.7	3.45	47	10.5	7	3.4	1.4	3	1	0
791	0	1	37.1	97	105	55	71.6667	19	99	1	0	6.6	4.86	173	15.2	14.2	3.4	1.3	3	5	0
792	0	3	37.3	103	118	84	95.3333	16	99	2	29	4.8	3.91	214	11.3	6	4.8	1.1	0	1	0
793	0	4	37.2	80	127	78	94.3333	12	100	0	17	4.8	3.77	127	12.9	12.5	3.9	0.6	3	1	0
794	0	3	36.8	95	153	76	101.667	15	95	1	1	10.3	4.95	212	14.5	14	3.8	0.8	3	0	0
795	0	4	36.4	57	174	117	136	18	98	3	2	12.3	5.03	153	14.7	13.7	3.8	0.9	3	1	0
796	0	6	36.3	136	136	99	111.333	40	99	6	1	13.6	4.38	490	12.3	15.5	3.4	1.1	5	1	1
797	0	5	37.6	68	104	68	80	18	91	1	6	11.7	4.98	190	14.2	8	4.2	0.8	0	2	0
798	0	2	37.4	64	99	68	78.3333	18	95	2	4	16.8	4.18	239	12.1	13.8	4.9	1.9	4	0	0
799	1	5	36.5	124	81	55	63.6667	21	100	5	3	13.6	4.38	325	13.3	14.2	5.6	6.3	3	1	1
800	0	5	37.3	85	152	122	132	32	97	3	0	6.1	3.21	179	9.1	7	4	0.6	5	5	0
801	0	5	36.6	58	173	81	111.667	10	100	1	41	17.8	4.75	269	14.8	12.8	3.8	0.8	0	0	0
802	1	7	36.9	64	147	78	101	25	93	3	6	16.8	5.75	176	15.4	9	4.3	1.4	3	2	0
803	0	5	36.8	106	126	69	88	29	85	5	4	12.1	3.66	100	10.6	11.8	4.1	0.6	3	0	0
804	0	3	37.1	78	103	82	89	17	95	3	3	13.8	3.73	370	11.8	8	3.7	0.8	3	0	0
805	0	3	36.4	79	97	71	79.6667	20	99	2	3	39.1	2.67	361	8	14.1	4.3	1	3	0	0
806	1	3	37.7	91	113	73	86.3333	32	100	3	1	8.4	2.9	275	8.4	18.6	4.8	3.9	6	1	0
807	1	4	37	89	156	81	106	24	88	2	3	12.1	3.98	148	11.8	15.6	5	5.4	3	0	0
808	1	3	37.5	81	172	107	128.667	30	100	3	17	17.4	4.66	194	15.1	14	4	1.3	3	4	0
809	0	7	37	80	150	79	102.667	23	90	4	13	13.6	3.65	173	12.3	12	3.7	0.9	0	1	0
810	0	0	37.4	82	118	64	82	18	95	3	3	9.2	5.14	197	14.8	14	3.8	0.6	3	1	0
811	0	1	36	88	82	50	60.6667	25	98	4	21	8.7	4.32	200	12.6	7	4.2	0.8	5	0	0
812	0	6	36.6	75	183	97	125.667	13	99	0	7	23.2	5.02	243	15.4	13.3	4	0.9	3	0	0
813	0	3	36.4	96	157	120	132.333	20	100	1	0	6.7	3.53	179	10.5	14	4.2	1.4	6	0	0
814	0	3	36.5	110	116	79	91.3333	21	98	5	0	14.64	3.92	385	12.3	17.5	4.2	0.6	3	0	1
815	1	4	37.3	111	138	90	106	18	96	3	23	6.7	5.35	179	15.4	6	3.2	0.9	0	1	0
816	1	5	36	107	123	70	87.6667	9	98	3	40	12.8	3.8	218	11.5	14.1	4.3	1.5	3	1	0
817	0	5	36.6	78	142	129	133.333	15	100	1	2	11	3.82	544	9.8	15.5	4.4	0.7	3	1	0
818	0	2	36.5	86	142	87	105.333	17	99	1	3	5.1	2.95	174	9.9	7	3.8	10.8	5	0	0
819	0	2	37	105	107	59	75	31	98	5	3	6.5	3.22	207	10.8	13.3	3.8	0.6	3	1	0
820	0	1	37.1	84	131	80	97	18	100	1	1	6.6	4.57	223	13.2	12.3	4.3	0.6	0	2	0
821	1	3	37.5	85	123	68	86.3333	24	98	2	3	5.6	3.51	158	11.3	11	3	1.1	3	0	0
822	1	0	37.6	125	154	93	113.333	14	100	4	1	6.5	3.42	165	10.8	14.6	4.5	0.9	5	2	0
823	1	3	36.6	92	118	70	86	17	94	1	27	13.4	5.2	159	13.3	14.4	4	0.7	3	0	0
824	0	5	38.3	124	119	75	89.6667	12	100	5	1	3.5	2.91	118	9.9	13.4	4.1	0.9	3	0	1
825	1	4	36.5	78	109	71	83.6667	34	98	3	3	8.9	4.78	296	13.8	12.4	4.1	0.8	0	5	0
826	1	6	36	69	155	74	101	14	100	0	8	21.1	4.53	272	12.6	14	4	0.8	3	0	0
827	0	5	37.3	94	186	87	120	20	98	1	4	22.3	2.56	489	7.6	15.4	3.7	3	3	0	0
828	0	3	37.9	85	135	87	103	18	98	1	2	11.9	5.99	231	17.6	13.8	4.7	1	5	1	0
829	0	7	38	95	129	92	104.333	19	96	1	2	7.1	4.9	238	14.2	12.8	3.9	0.8	0	5	0
830	0	5	37	87	179	106	130.333	20	97	1	27	16.9	3.74	287	10.8	17.5	4.1	1.1	5	0	0
831	0	4	37.1	72	139	89	105.667	14	98	0	24	15.7	3.21	425	9.1	14	5.5	2.8	0	0	0
832	1	3	36.9	62	155	96	115.667	18	99	1	3	8.6	3.97	190	12.7	13.7	4.1	0.4	5	1	0
833	0	3	36.7	60	136	96	109.333	20	97	1	0	6.5	3.16	63	9.6	18.4	3.9	1.5	4	1	0
834	1	1	37.3	115	123	94	103.667	20	100	3	8	13.6	3.19	420	8.2	16	4.7	5.7	3	5	1
835	0	4	37.7	101	138	78	98	17	95	3	4	5.4	3.73	206	11.1	14.3	4.7	2.4	3	0	0
836	1	5	36.9	85	81	53	62.3333	18	96	2	1	8.3	3.05	266	9.3	12.6	4.9	0.8	3	0	0
837	0	2	37.7	71	137	95	109	14	96	0	5	10.4	4.4	398	11.8	8	4.4	1.8	5	0	0
838	0	5	38.6	118	176	98	124	19	98	6	19	5.1	3.91	187	12.6	14.1	4.6	1	6	0	0
839	0	3	36.6	103	92	62	72	13	100	2	29	12.3	2.83	279	8	7	3	4	3	0	0
840	0	3	38.1	147	207	140	162.333	18	96	6	21	5.6	4.94	152	14.3	13.9	4.9	5.7	3	0	1
841	0	4	37.4	86	171	98	122.333	20	98	1	15	7.4	4.45	220	13.4	7	4	4.3	3	0	0
842	1	1	37.6	81	114	77	89.3333	21	100	2	11	16.2	3.94	625	11.9	8	4	0.4	5	2	0
843	0	1	37	81	119	78	91.6667	15	100	1	8	9.5	3.72	292	10.4	7	3.8	1	3	0	0
844	0	3	37	89	153	101	118.333	19	99	1	6	8.6	4.23	301	12.6	12.4	4.2	0.8	5	2	0
845	0	0	37.5	93	118	67	84	10	100	1	3	16.4	3.47	147	11.6	15.7	4.2	1.7	3	4	0
846	0	4	36.2	77	166	94	118	18	100	1	29	7.9	4.14	189	12.5	14.5	4.8	1.4	3	1	0
847	0	6	37	103	131	75	93.6667	20	97	2	17	8.7	4.26	175	14.4	12.5	4.5	1.9	3	1	0
848	1	4	37	97	98	66	76.6667	15	97	3	13	12.2	5.6	365	16	13.2	4.5	2.1	0	4	0
849	0	3	36.9	80	144	93	110	25	99	3	14	4.8	3.3	131	9.6	7	3.9	2.4	3	0	0
850	1	3	36.9	75	124	84	97.3333	12	100	0	2	7.8	4.18	241	14	14.7	4	0.8	3	1	0
851	0	1	37.1	92	139	87	104.333	17	100	1	5	6.1	3.3	308	9.4	7	4	4.4	3	0	0
852	0	4	36.8	92	169	94	119	20	96	1	3	5.4	3.48	100	9.7	7	4.1	0.8	3	5	0
853	1	6	38.3	90	162	76	104.667	20	96	1	2	17.8	3.66	393	10.6	13.2	4.4	4.1	2	1	0
854	0	3	35	81	89	69	75.6667	35	80	10	1	7.4	4.29	143	13.7	19.5	3.8	0.9	5	1	1
855	0	4	36.5	75	121	69	86.3333	24	96	2	14	10.2	3.85	245	12.9	13.3	4.6	0.7	2	0	0
856	0	3	36.4	94	166	96	119.333	20	99	1	25	8.1	4.51	111	13	4	3.3	0.7	3	5	0
857	0	4	37.8	95	114	67	82.6667	26	96	2	7	18.2	2.98	174	8.7	16.2	4.5	1	5	1	0
858	0	6	37	82	148	72	97.3333	15	100	1	5	24.7	3.86	314	8.5	10	3.3	0.7	0	0	0
859	0	4	37	98	112	65	80.6667	17	95	2	8	11.7	4.2	184	12.6	13.3	4.7	1	2	0	0
860	0	4	37.7	115	123	95	104.333	20	95	3	4	4.8	2.34	78	7.5	7	4	1.1	0	0	0
861	0	2	37.2	69	160	134	142.667	21	100	2	41	18.4	5.37	98	14.9	17.9	4.4	1.6	2	1	0
862	0	1	37.2	81	134	72	92.6667	18	100	1	0	14.6	4.39	307	10.4	14	3.9	0.5	5	1	0
863	1	3	35.5	148	101	85	90.3333	25	95	6	4	10.2	4.15	561	12.5	14.2	4.2	0.6	2	0	1
864	0	4	37.7	74	143	93	109.667	19	98	1	4	20.4	2.96	169	9.4	14.6	4.6	2	0	5	0
865	0	0	37.8	87	130	67	88	20	98	1	17	7.3	4.8	358	10.4	18	4.4	0.9	5	0	0
866	1	5	36	79	125	79	94.3333	20	99	1	12	9.4	3.8	60	11.3	12.6	3.2	0.7	2	0	0
867	0	4	37.2	156	126	52	76.6667	49	95	6	3	13.6	5.23	299	15.2	16.2	3.7	1.2	5	1	1
868	0	5	36.7	51	127	83	97.6667	12	94	2	1	5.6	2.81	15	7.7	18.4	3.9	1.9	5	0	1
869	1	5	37	83	125	82	96.3333	16	98	1	25	14.2	4.56	138	14.6	15.9	3.1	0.5	6	1	0
870	1	3	37.9	116	132	94	106.667	16	97	3	2	5.8	2.69	72	9	17.3	5	7.3	4	1	0
871	1	4	37.1	92	119	81	93.6667	20	100	1	4	4.6	4.86	404	13.1	15.4	4.5	1.7	2	1	0
872	0	5	36.6	70	172	132	145.333	17	98	1	1	9.7	3.62	118	11.3	8	4.6	1.4	5	0	0
873	0	2	36.8	115	97	61	73	22	95	8	10	11.5	5.35	221	15.3	13.8	3.6	0.8	5	0	1
874	0	4	37.7	84	120	72	88	20	97	1	3	6.5	4.15	152	12.6	13.2	4.1	0.7	2	0	1
875	1	6	37.1	63	215	102	139.667	20	95	3	23	10.2	3.93	275	11.9	8	4.1	0.7	5	1	0
876	0	4	36.8	98	152	99	116.667	20	96	1	9	6.7	4.41	208	11.7	8	4.8	4.1	5	5	0
877	1	2	37.3	105	137	96	109.667	30	99	4	0	9.3	4.9	165	14.6	11.9	3.7	0.7	4	2	1
878	0	4	36.5	89	101	70	80.3333	20	97	1	5	11.9	4.63	361	15	13.6	4.4	0.5	2	4	0
879	1	4	36.5	86	197	105	135.667	16	98	1	15	7.6	4.17	310	11.9	14.2	3.7	0.7	4	0	0
880	0	7	36.6	65	146	87	106.667	20	100	1	3	12.8	4.11	704	7.7	7	4.3	0.4	5	4	0
881	0	4	36	67	134	92	106	13	99	1	1	7.8	3.17	200	9.5	7	4.7	0.9	0	1	0
882	1	5	37.2	166	136	96	109.333	21	62	8	2	9.5	4.91	289	13.8	8	3.8	0.8	0	0	0
883	1	2	36.7	129	79	41	53.6667	24	98	7	2	8.3	3.79	202	10.3	14.6	4.6	6.4	4	0	1
884	1	2	37.8	115	117	74	88.3333	23	98	4	1	10	3.11	241	6.7	7	4.5	1	4	4	0
885	0	6	37.3	71	208	85	126	16	95	3	6	14	4.39	279	13.6	12.6	4.5	0.9	5	0	0
886	0	5	36.4	92	122	78	92.6667	20	96	1	3	16.2	5.12	323	13	9	4.6	1.2	4	0	0
887	0	4	37.4	77	150	89	109.333	24	98	2	2	9.7	3.28	365	7.6	8	3.9	0.9	4	1	0
888	0	2	36.5	86	145	77	99.6667	19	98	1	6	15	4.75	271	14	13.6	3.6	0.7	0	4	0
889	0	1	36.5	94	128	83	98	22	95	2	14	4.5	4.63	108	13.6	14.6	5	1.2	4	0	0
890	1	2	35.6	103	114	77	89.3333	20	100	3	31	9.7	2.59	253	6.8	17.2	4.5	1.4	4	1	0
891	1	5	36.5	77	156	83	107.333	20	98	1	5	17.9	3.64	509	10.4	14.2	3.5	0.4	4	1	0
892	0	4	37.2	104	135	79	97.6667	20	100	2	2	12.5	3.74	78	11.4	13.8	3.7	1	5	1	0
893	1	4	35.9	68	136	83	100.667	22	97	2	7	3.7	3.96	168	11.8	14	4.4	0.7	3	5	1
894	0	2	37	77	162	81	108	17	100	1	1	12.9	3.39	235	10.8	13.6	2.9	0.8	4	1	0
895	0	3	36.7	71	176	98	124	20	98	1	0	9.2	5.06	206	15.9	12.9	3.7	1	4	2	0
896	0	5	36.1	71	160	88	112	19	99	2	6	18.1	4.46	62	13.4	13.8	3.8	1.1	4	1	0
897	0	5	35.7	86	144	103	116.667	25	90	4	3	8.3	4.14	233	11	16.1	4.1	6	5	1	0
898	1	4	35.9	96	184	104	130.667	15	100	2	2	10.2	3.89	280	10.4	9	5.1	1.3	0	2	0
899	0	2	37.1	103	147	97	113.667	22	92	4	7	7.9	4.69	204	15.1	13.6	3.9	1.1	5	0	1
900	0	1	36	128	113	42	65.6667	43	75	8	28	7.4	4.22	178	13	13.1	3.3	0.9	5	1	1
901	1	2	36.5	75	102	65	77.3333	16	99	1	2	27.5	3.2	275	10.4	12.2	3.9	0.3	4	5	0
902	1	1	36	80	110	65	80	26	99	2	1	13	2.8	180	8.3	14.2	5	1	5	0	0
903	0	4	36.4	66	115	96	102.333	20	90	1	5	14.1	4.04	379	10.8	8	4.4	0.6	0	1	0
904	0	4	36.4	66	116	94	101.333	20	90	1	0	12.4	4.45	192	13.6	12.9	3.6	0.8	5	2	0
905	1	7	36.4	88	154	72	99.3333	18	98	1	26	9.4	2.93	267	8.2	8	4	0.6	0	5	0
906	0	3	36.1	62	192	93	126	17	100	3	2	32.7	2.99	1044	9.4	23.5	5.3	5.4	3	2	1
907	0	3	36.5	72	158	113	128	14	97	2	2	8.6	3.63	178	11.3	13.9	4.6	0.8	4	0	0
908	1	1	36.5	82	110	68	82	17	99	1	19	5.2	4.04	199	12.4	12.1	3.4	0.8	5	5	0
909	0	3	35.5	83	136	88	104	19	100	3	0	46.2	3.9	145	10.1	7	3.6	1.8	4	5	0
910	1	1	37.7	85	114	65	81.3333	12	95	0	6	16.7	4.56	159	13.8	11.9	3.5	1.2	0	0	0
911	0	4	36	76	146	91	109.333	20	100	1	1	9.5	4.62	211	12.2	6	4	1	5	0	0
912	0	1	37	120	125	102	109.667	20	99	3	60	10.7	3	194	8.6	7	3.4	0.7	0	0	0
913	0	1	37.1	60	142	88	106	20	100	1	2	13.9	3.85	226	12.3	13.6	4.2	0.9	4	5	0
914	1	6	36.2	66	172	85	114	17	95	1	16	12.4	4.5	228	13	7	4	0.6	4	0	0
915	0	5	36.8	106	150	102	118	26	98	3	11	4.5	4.14	150	13	14.1	3.2	0.9	5	2	0
916	0	5	35.8	107	81	60	67	24	96	4	0	8.6	3.54	278	10.3	13.7	3	0.8	6	0	0
917	0	5	35.8	107	81	60	67	24	96	4	26	9.9	4.19	228	13	13	4.6	1.7	0	5	0
918	0	2	36.7	65	115	69	84.3333	18	98	1	2	6.4	3.25	249	10.4	13.7	4.5	1.6	0	1	0
919	0	8	36.1	37	115	75	88.3333	18	95	3	19	9.3	4.17	251	12.3	13.3	3.9	0.6	3	5	0
920	0	2	38.1	75	130	75	93.3333	15	98	2	11	6.8	4.71	197	15.3	13	4	0.9	4	3	0
921	0	1	34.7	85	78	40	52.6667	33	99	8	11	7.3	3.98	141	12.2	17.9	3.9	0.7	5	5	1
922	1	4	36.9	76	109	66	80.3333	19	100	1	6	7.2	3.86	92	12.1	12.6	5	0.8	5	2	0
923	0	3	37.5	101	126	78	94	35	100	4	15	8	2.79	170	8.8	12.3	4.5	1	5	1	0
924	0	4	36.3	70	115	64	81	16	100	1	25	7.4	2.51	129	8.6	5	3.9	1.6	5	0	0
925	0	5	36.7	101	134	88	103.333	27	98	3	12	12.7	3.98	328	10.7	14.9	4.6	1.7	4	3	0
926	1	5	36.7	94	85	57	66.3333	20	95	2	7	6	4.39	209	13.9	11.6	3.8	0.7	5	4	0
927	1	3	37.5	69	116	75	88.6667	18	99	1	18	10	3.49	169	10.1	7	3.9	1	4	0	0
928	0	6	36.7	86	167	96	119.667	25	96	5	2	21.9	3.83	313	12.9	6	4.6	1.2	5	0	0
929	0	7	35.7	73	218	111	146.667	22	100	6	5	6.1	3.88	276	12.3	15	3.9	0.6	4	5	0
930	0	1	37.4	85	147	93	111	18	98	1	23	19.4	4.47	460	14.7	12.7	3.8	0.8	4	3	0
931	1	2	36.6	85	111	100	103.667	26	100	2	545	9.3	3.38	187	11.7	13.4	4.3	1.9	5	2	0
932	0	5	35.9	86	130	95	106.667	16	98	4	3	7.9	3.78	153	10.6	8	3.6	2	0	5	0
933	0	1	37.8	96	146	80	102	17	98	1	16	0.5	2.25	91	6.8	18.5	3.8	1.5	5	1	0
934	0	2	36.4	85	127	83	97.6667	24	97	2	23	16.3	3.95	187	10.1	8	4	1.3	0	2	0
935	0	1	36.5	80	130	78	95.3333	20	99	1	2	9.7	3.54	168	10.9	14.2	4.6	1.7	5	0	0
936	0	1	35	105	153	102	119	25	99	4	2	8.8	4.32	230	13.1	12.4	3.6	0.6	4	2	0
937	0	3	35	70	83	72	75.6667	29	93	3	25	7.9	4.17	20	11.7	15.8	4.1	1.6	4	5	0
938	0	4	37.1	87	148	101	116.667	22	100	2	23	3.2	2.71	154	8.3	12	3.3	0.5	5	5	0
939	1	5	36.7	83	143	73	96.3333	18	99	1	16	9.5	4.81	244	14	14.2	3.9	0.9	4	1	0
940	0	1	36.7	101	124	64	84	22	99	3	7	9.5	3.67	210	11.2	15.1		1.7	0	1	0
941	0	3	36.6	85	143	93	109.667	16	95	1	19	22.9	4.71	209	13.6	13.2	5	2.4	0	1	0
942	0	5	36.5	60	155	79	104.333	20	95	2	17	7.2	2.59	167	8.7	14.5	4	1	5	2	0
943	0	1	35.7	93	133	80	97.6667	20	100	3	16	13.7	3.86	333	11.5	13.7	2.9	0.6	6	0	0
944	0	2	37.2	95	104	77	86	20	95	1	284	6.6	5.38	212	15	13.7	3.9	1	5	4	0
945	0	1	37.3	77	149	83	105	17	97	1	8	13.7	4.84	185	13.8	12.4	4.5	0.7	4	3	0
946	0	3	37	93	141	103	115.667	19	98	1	14	9.7	3.22	175	10.4	13.6	4.2	2.2	5	1	0
947	0	1	36	92	133	77	95.6667	17	98	1	17	6.4	5.53	207	14.7	13.8	4.8	1.3	4	0	0
948	1	5	37.3	19	134	73	93.3333	20	100	3	3	8.9	3	225	8.9	14.5	4.8	5.6	3	5	1
949	1	7	37	94	142	55	84	18	98	1	30	9	3.26	243	11.1	16.6	3.2	0.8	5	1	0
950	0	3	36.5	80	143	89	107	18	99	1	15	8.7	3.2	286	9.3	15.6	4	1.7	4	0	0
951	0	3	37	75	138	86	103.333	19	100	1	6	15.7	3.89	263	12.2	13	3.7	1.4	3	0	0
952	0	3	37	67	131	96	107.667	18	98	1	186	5.3	3.93	215	12.3	13.5	4.8	1.2	5	0	0
953	0	4	37	69	153	93	113	18	97	1	3	8	4.46	280	12	15.3	4.9	1.2	5	4	0
954	1	5	37.6	120	62	43	49.3333	16	97	6	13	9.4	4.5	252	13.2	14.4	4	0.9	4	2	1
955	0	2	36.6	116	107	76	86.3333	23	98	6	114	16.5	3.11	420	9.5	14.7	3.9	4.1	4	1	0
956	0	5	36.9	78	149	86	107	20	100	1	1	12.2	4.08	87	12.6	8	4.2	1.3	4	2	0
957	0	1	36.7	92	132	84	100	21	98	2	5	12.9	4.3	103	13.5	14.8	4	1.1	4	0	0
958	1	6	36.9	105	161	105	123.667	28	85	3	13	10.7	4.01	252	12.2	13.4	4.2	1.1	5	4	0
959	0	1	36.9	95	125	66	85.6667	26	98	3	14	31.8	4.03	485	11.1	16.4	4.2	0.8	4	3	0
960	1	4	35.8	85	107	71	83	20	98	2	6	6.3	4.68	202	13.7	14.2	3.6	0.9	0	0	0
961	0	5	35.6	145	62	51	54.6667	25	96	10	23	14.5	3.89	325	12.8	14.5	4.4	1.9	4	3	1
962	0	8	37.1	40	143	65	91	23	96	6	20	17.9	4.96	179	15	13.5	5	6.4	4	3	1
963	1	2	36.5	60	129	60	83	12	100	0	23	14.9	5.02	224	14.3	12.7	4.2	0.8	5	4	0
964	1	8	36.5	72	188	73	111.333	18	96	1	51	13.4	3.82	82	13.1	13.2	3.6	1.2	4	1	0
965	1	5	36.1	70	155	101	119	23	93	3	6	12.7	3.35	316	10.4	12.3	4.3	1.2	5	2	0
966	0	1	37.3	60	118	72	87.3333	20	98	1	4	13.8	4.19	136	12.9	9	2.9	0.8	5	5	0
967	0	2	36.3	95	128	83	98	14	100	0	7	14.7	5.12	118	15.4	13	4	1.8	0	4	0
968	1	1	38.5	111	135	113	120.333	13	98	6	7	15	5.09	217	16.8	12.2	4.7	1	4	5	0
969	1	7	37.7	77	152	75	100.667	19	98	1	70	16.9	4.53	341	13.5	8	4	0.7	4	3	0
970	0	6	37.2	85	158	94	115.333	12	99	0	16	9.4	4.55	133	13.6	5	3	2.1	0	5	0
971	1	5	37.1	84	110	69	82.6667	20	97	2	64	6.8	3.71	249	10.9	12.7	3.8	0.7	4	3	0
972	0	4	37	111	158	102	120.667	19	95	3	27	5	2.7	224	7.8	8	3.8	0.9	5	4	0
973	0	4	36.7	100	160	82	108	19	96	1	45	16.9	4.55	267	12.4	15.4	4.9	0.7	0	5	0
974	0	2	37.1	101	118	79	92	22	99	3	10	8.3	4.52	202	13.6	14.6	3.6	0.7	5	4	0
975	1	5	33.4	94	175	147	156.333	25	90	4	41	11.8	4.33	172	13.6	13.1	4.2	4.1	4	2	1
976	0	1	33.5	45	34	20	24.6667	15	20	9	1	11.1	4.19	236	11.8	18.6	5.8	5.7	4	1	1
977	1	4	36.4	69	156	88	110.667	19	99	1	68	12	3.99	307	12.8	13.7	4.8	0.8	0	1	0
978	0	5	35.3	56	153	75	101	19	96	1	6	15.3	5.63	188	17.6	7	4.3	1.1	4	5	0
979	0	1	37.4	97	96	84	88	25	95	3	0	10.2	3.87	156	13.3	13.4	2.8	1.1	4	3	0
980	0	4	36.5	91	137	82	100.333	18	95	1	19	11.9	5.71	247	16.6	16.3	3	1.4	4	1	0
981	1	1	36.2	77	123	81	95	15	95	1	3	8.8	4.01	267	12.8	14.1	4.8	0.8	4	5	0
982	0	2	36.6	107	109	79	89	17	95	2	0	18.4	1.97	212	6.1	15.4	3	2.3	4	3	0
983	0	5	36.5	70	129	88	101.667	20	94	1	69	11.9	3.09	265	12.9	12.4	3.9	1.2	0	1	0
984	0	5	36.5	103	97	54	68.3333	28	94	4	22	7.8	4.68	202	13.8	12.2	6.1	0.8	4	3	0
985	0	5	36.6	85	147	98	114.333	31	100	3	237	19	4.63	299	12.9	6	4	1.5	4	1	0
986	1	3	37.6	99	131	84	99.6667	18	99	1	6	9.5	4.53	264	12.6	16.2	4.6	0.7	4	1	0
987	0	0	36.3	82	122	83	96	16	96	1	24	18	3.27	289	9.8	17.3	6.4	8	4	0	1
988	0	1	37	76	119	81	93.6667	18	99	1	27	7.6	3.96	237	12	13.6	4.2	0.7	0	5	0
989	1	3	37.2	100	115	80	91.6667	16	100	1	5	7.6	4.26	225	13.4	3	4.1	0.7	4	3	0
990	0	4	34.5	35	86	54	64.6667	20	95	9	0	3.8	4.06	118	11.3	15.8	4	0.6	4	5	1
991	0	4	33.7	30	95	32	53	20	95	9	2	7.8	3.41	141	9.5	18.3	3.9	0.9	5	1	1
992	1	5	37.5	75	122	61	81.3333	13	98	1	21	10.3	4.96	281	13.7	13.5	3.4	0.9	4	1	0
993	0	2	37	80	127	80	95.6667	18	99	1	21	9.1	3.96	201	11.1	13.2	4.5	1.2	4	1	0
994	0	3	36.1	77	132	85	100.667	19	99	2	3	17.1	3.82	245	11.9	9	4.7	1.8	5	1	0
995	0	3	36.4	87	142	89	106.667	18	99	1	26	6.9	4.01	280	12.6	15.7	3.9	0.7	4	1	0
996	1	5	38.9	106	126	64	84.6667	29	98	5	1	10.9	3.2	199	10.3	15.5	5.9	5.7	4	2	1
997	0	4	35.8	96	115	65	81.6667	19	83	3	2	16.3	5.1	215	15.3	12.2	3.8	1.6	4	0	0
998	0	1	35.3	133	102	54	70	25	100	5	22	18.5	4.14	204	12.4	13.2	4.5	6	4	5	1
999	0	5	36.3	89	175	100	125	20	98	1	5	2.3	2.53	86	9.9	15.6	4.1	1	0	1	0
1000	1	4	36.6	59	131	76	94.3333	19	97	1	6	13.1	4.66	165	14.6	15.2	3.8	0.9	0	1	0
1001	1	3	35.6	88	141	111	121	18	96	1	4	9	3.41	206	10.6	14.6	4.3	1	5	2	0
1002	0	5	37	82	141	82	101.667	19	99	1	3	5.1	3.01	138	8.9	6	4	0.6	5	0	0
1003	0	5	36.8	94	112	71	84.6667	26	91	2	15	7.2	4.07	407	12.4	8	3.8	0.6	4	1	0
1004	0	3	36.3	114	151	117	128.333	29	93	4	11	15.8	2.83	146	7.6	7	4	3.1	5	2	0
1005	1	5	37	92	142	93	109.333	15	98	1	5	9.5	3.92	242	11.4	14.4	3.5	1.1	4	5	0
1006	0	5	36.6	95	139	66	90.3333	20	96	1	3	7.4	4.59	244	13.8	12.3	4	0.7	4	5	0
1007	0	4	36.8	89	109	71	83.6667	18	98	1	28	7	4.18	139	11.8	15.2	4	1.1	5	4	0
1008	0	1	36.4	72	146	81	102.667	19	98	1	27	28.3	2.56	399	7.7	15.3	4.5	1.3	4	3	0
1009	1	5	37.9	104	137	64	88.3333	15	100	2	2	9.2	5.44	232	14.3	14.3	4.3	1.4	5	2	0
1010	1	5	36.5	91	202	100	134	16	94	6	4	5.9	4.64	237	13.7	12.1	4.3	5.9	4	4	1
1011	0	5	36.7	84	181	94	123	22	100	2	5	17.7	4.03	239	12.2	6	4.6	1.4	4	0	0
1012	0	1	35.8	89	136	87	103.333	23	98	3	2	6.7	3.08	239	8.2	17.9	3.5	4.8	5	4	0
1013	0	7	36.5	55	157	88	111	15	98	1	23	16.7	4.27	211	15.2	13.8	3.7	0.9	4	1	0
1014	0	0	37.6	88	129	78	95	20	98	1	0	2.9	2.3	67	7.3	17.3	3.6	0.5	4	1	0
1015	1	7	37.6	71	184	113	136.667	15	99	3	65	8.2	4.1	268	13.1	12	4.2	1	5	1	0
1016	0	1	38	66	156	96	116	20	97	5	4	5.1	4.99	86	15.5	14.3	3.4	1.2	4	1	0
1017	0	6	37.1	105	178	89	118.667	24	97	4	21	7.6	4.91	167	15	13.9	4.2	1.1	5	2	0
1018	1	4	36.5	117	131	82	98.3333	20	96	3	5	8.4	4.9	298	14	16.1	3.6	0.7	0	5	0
1019	0	4	37.3	105	136	77	96.6667	17	97	2	12	12.7	4.56	197	13.4	12.5	4.1	1.2	4	1	0
1020	0	4	37.2	98	156	102	120	18	95	2	3	10.4	4.18	210	13.3	12.8	4.1	0.8	5	1	0
1021	0	5	35.7	118	123	75	91	19	95	1	3	11.6	4.93	239	13.6	15.4	4.1	1.1	4	5	0
1022	1	3	36.7	87	111	75	87	17	100	1	4	7.6	4.31	218	12.2	8	4	8.3	3	0	0
1023	0	7	35	101	212	105	140.667	19	97	4	69	7.9	3.82	109	12.4	18.3	4.4	5.3	4	5	1
1024	0	2	36.7	97	198	111	140	20	98	1	3	10	5.62	272	16.2	14.6	5	1.1	3	1	0
1025	0	4	35.9	60	152	110	124	13	97	0	13	16.7	3.32	334	9.1	6	3.9	0.9	4	5	0
1026	1	3	37.1	88	150	88	108.667	18	99	1	9	8.2	4.51	183	14.7	14.8	3.7	1.6	5	1	0
1027	0	3	38	64	169	111	130.333	20	95	4	17	8	3.77	184	13.3	11.9	3.2	0.8	4	3	0
1028	1	2	37.5	74	123	75	91	16	97	1	13	12.8	3.85	212	12.4	7	4	1.3	4	3	0
1029	1	3	36.9	66	76	53	60.6667	13	100	2	17	6.7	1.68	25	5.9	16.9	4.4	1.5	5	1	0
1030	1	5	36.1	64	168	97	120.667	16	98	1	20	12.7	5.46	159	16	5	3.4	0.8	5	5	0
1031	0	4	38	126	132	81	98	24	98	6	9	6	4.31	264	13.9	12.7	4.3	1.2	4	2	0
1032	0	3	36.8	74	110	79	89.3333	18	98	1	3	20.7	3.22	396	9.3	18	3.8	1.3	1	2	0
1033	0	1	37.6	65	122	85	97.3333	19	100	1	3	18.4	2.22	166	7.6	15.7	3.3	0.9	4	5	0
1034	0	3	36	73	159	97	117.667	18	99	1	1	8.9	3.82	78	11.5	12.6	4.4	1	0	1	0
1035	0	0	37	96	147	72	97	20	100	1	1	10.5	4.43	221	13.5	13.6	4	0.5	1	5	0
1036	0	5	37	69	124	95	104.667	19	100	1	1	7.8	3.44	265	12	6	4.2	0.8	3	2	0
1037	0	5	37.2	86	146	88	107.333	18	99	1	4	14.7	4.08	493	10.3	19.4	4.5	0.8	1	0	0
1038	0	3	36.3	56	107	63	77.6667	20	98	1	12	14.1	3.66	317	10.8	14.5	4.6	1.3	1	1	0
1039	0	4	37.9	135	126	85	98.6667	16	99	4	4	6.8	4.2	201	13.3	14.5	4.7	1.6	4	5	0
1040	0	6	37	64	138	107	117.333	12	95	2	215	6.9	4.22	255	12.2	14.8	3.9	1	1	4	0
1041	1	4	36.5	105	113	70	84.3333	13	90	3	11	8.8	3.08	108	9.4	8	4.2	1.9	1	1	0
1042	1	5	36.2	63	139	81	100.333	19	100	3	3	3.9	2.81	231	9.3	12.3	3.7	1	4	1	0
1043	1	3	37	83	128	78	94.6667	20	98	1	0	9	4.11	184	11.4	14.4	4	1.1	1	4	0
1044	0	4	37	98	153	99	117	20	96	1	3	4.7	4.35	213	12.4	14.5	4.2	2.2	0	2	0
1045	0	0	36.5	140	106	70	82	18	99	4	9	9.5	4.31	233	14	13	3.8	0.7	4	4	0
1046	0	7	37.2	105	150	103	118.667	19	99	2	0	7.3	4.55	246	13.3	12.4	3.5	0.9	4	1	0
1047	0	2	37.1	85	119	70	86.3333	15	100	1	6	7.4	2.14	122	6.3	16.6	5	3.2	4	4	0
1048	0	2	36.8	81	113	77	89	13	98	0	43	4	1.93	104	5.7	12	3.8	2.6	0	2	0
1049	0	1	36.1	66	130	79	96	17	100	1	12	12.9	3.01	243	9.4	13.7	4.8	1.5	6	1	0
1050	0	1	36.5	84	136	94	108	18	98	1	21	9.2	3.87	161	12.9	15.4	5.5	1.6	4	0	0
1051	0	3	36.1	97	178	108	131.333	16	92	4	2	9.3	5.08	224	15.3	12.5	3	1.3	1	0	0
1052	0	4	36.8	68	114	67	82.6667	20	100	1	5	9.8	3.46	562	8.4	15.9	5	1.4	0	5	0
1053	0	4	35.4	80	102	51	68	20	97	1	2	10.3	4.92	172	14	13.4	4.1	0.7	3	5	0
1054	0	2	37.3	73	120	76	90.6667	19	99	1	3	7	4.25	154	13.2	14.2	4.4	0.8	4	4	0
1055	1	3	36.2	83	200	125	150	15	99	3	2	10.7	4.39	235	12.2	14.7	3.7	0.8	0	5	0
1056	0	1	36.8	79	121	74	89.6667	18	92	1	22	10.2	3.8	186	10.4	13.3	4.3	0.8	3	5	0
1057	0	4	37.2	106	107	77	87	23	99	3	5	12.2	3.13	197	9.9	14.5	4.5	1	0	1	0
1058	0	4	35.9	42	185	146	159	15	96	4	1	13.8	5.47	222	18	12.5	3.7	0.7	4	2	0
1059	0	5	34.8	0	0	0	0	0	0	12	1	7.3	3.98	132	11.6	19.2	4.2	5.1	3	3	1
1060	0	3	36.5	79	135	82	99.6667	18	100	1	31	9.3	4.55	211	15.5	12.7	4.5	0.9	4	1	0
1061	0	6	36.5	86	161	101	121	20	96	2	7	15.3	2.29	144	7	13.6	3.7	1.1	1	2	0
1062	0	2	36.7	62	154	80	104.667	20	98	1	5	6.7	4.18	124	11.5	14.9	3.4	0.6	4	0	0
1063	1	6	36.4	49	145	89	107.667	20	100	5	2	6.5	4.43	143	13.2	13.2	4.7	4.7	4	0	1
1064	1	4	37.1	74	136	78	97.3333	17	98	1	3	5.6	4	133	12	14.2	4.2	0.9	1	2	0
1065	1	5	35.7	61	150	80	103.333	21	99	3	2	10.1	2.6	359	8.8	8	4.7	0.7	0	1	0
1066	0	2	36.7	111	132	91	104.667	17	99	3	23	7.4	4.65	283	12	14.9	3.9	2	4	1	0
1067	1	3	36.1	78	146	95	112	20	100	1	3	9.2	4.5	332	13.6	12.2	4.2	1.1	1	2	0
1068	0	3	37	91	132	87	102	22	96	2	15	7.4	3.87	207	11.2	13.5	3.2	0.3	1	2	0
1069	0	2	37.1	85	150	101	117.333	18	100	1	5	7.3	3.9	221	12.6	8	4.3	0.7	4	2	0
1070	1	5	37	90	193	115	141	20	99	1	3	8.8	3.51	318	11.1	8	3.8	1.2	4	0	0
1071	1	5	35.8	81	142	83	102.667	18	95	2	4	23.5	3.66	286	12.2	12.5	4	0.7	4	3	0
1072	0	4	36.6	79	135	78	97	18	100	1	27	18.3	4.22	261	14	13.2	4.8	1.1	4	3	0
1073	0	4	38.3	113	136	93	107.333	20	96	3	3	10	4.07	235	12.8	5	4.3	1	0	5	0
1074	0	3	37.5	90	137	90	105.667	20	100	1	7	13.5	4.72	180	14.8	13.6	3.8	0.8	1	2	0
1075	0	5	36.2	94	180	84	116	19	95	1	3	11.6	4.63	85	14.8	55	4.8	2.2	1	5	0
1076	0	6	37.3	102	121	88	99	31	98	4	14	6.2	3.36	171	11.6	12.9	4.4	1.2	1	4	0
1077	1	4	37.2	111	116	65	82	22	100	4	21	15.4	5.65	161	18	13.4	4.1	1.5	4	5	0
1078	0	6	37.6	67	181	101	127.667	18	96	1	4	15.2	2.35	144	6.9	14.2	3.2	0.7	1	1	0
1079	0	3	37.6	99	125	85	98.3333	21	99	2	11	7	4.32	174	12	5	4.1	1	1	4	0
1080	0	4	36.8	91	111	79	89.6667	22	96	2	8	7.7	2.5	109	7.8	13.6	4.7	0.6	4	1	0
1081	0	4	35.3	73	108	74	85.3333	20	98	1	6	9.7	3.96	262	11.7	8	4	1.2	0	0	0
1082	1	2	36.9	115	116	85	95.3333	31	100	5	3	17	3.67	374	12.2	6	4.3	0.8	4	2	0
1083	0	5	36.8	77	156	87	110	18	100	1	8	3	3.65	96	10.5	13.8	4	0.7	4	0	0
1084	1	1	37.8	125	131	86	101	32	100	5	21	5.1	4.6	154	15.3	12.7	4.4	1.1	4	1	1
1085	0	1	36	95	127	79	95	27	97	2	7	7.8	4.29	181	13.4	13.6	4.4	1.2	4	4	1
1086	1	4	35.5	66	62	52	55.3333	22	91	8	5	6.3	4.28	160	13.6	14.9	5	5.8	4	0	1
1087	0	3	37.1	84	121	89	99.6667	19	98	1	9	7.2	3.01	229	8.8	17.9	4.3	2.7	1	4	0
1088	0	1	36.5	91	146	77	100	18	98	2	13	7.8	5.45	217	16.6	12.4	4.1	0.8	4	1	0
1089	0	5	35.5	86	108	72	84	22	97	2	4	6	3.06	248	8.9	5	4.7	0.7	1	5	0
1090	0	3	37.3	96	129	84	99	20	99	1	6	10	4.05	187	12.5	9	4	1.2	1	1	0
1091	0	4	36.9	89	138	84	102	18	97	1	20	7.8	4.44	209	14.4	13.6	4.6	1.3	4	1	0
1092	1	4	37.1	70	106	64	78	16	100	1	3	18.6	5.63	390	14.8	12.6	2	2.4	4	1	0
1093	0	4	36.7	84	128	84	98.6667	13	98	0	15	14.6	4.22	219	13.3	12	4.3	0.7	2	1	0
1094	1	0	36.5	108	121	65	83.6667	18	98	2	4	7.9	2.96	89	10.2	14.4	3.1	1	0	5	0
1095	0	6	36.7	67	158	55	89.3333	18	94	0	4	11.2	3.47	157	10.9	13.9	3.5	3.4	2	5	0
1096	0	3	37.2	90	134	81	98.6667	45	100	2	20	6.4	5.18	209	15.1	12.6	3.6	0.9	2	4	0
1097	0	2	36.5	95	207	122	150.333	20	98	3	11	13.3	4.16	260	12.8	13.6	5	1.6	2	1	0
1098	0	4	36.7	79	124	75	91.3333	18	95	3	1	6.5	3.25	215	9.8	13.4	4	0.8	2	5	0
1099	0	4	36.8	67	175	101	125.667	20	100	1	5	15.2	5.11	348	13.4	8	4.3	1.1	1	4	0
1100	1	5	36.9	77	158	87	110.667	19	99	1	0	12.5	4.01	166	11.4	6	3	4.4	2	5	0
1101	0	5	36.9	77	158	87	110.667	19	99	1	35	12.9	2.62	173	8.6	14.6	5.5	5.7	0	5	0
1102	0	5	36.5	89	146	78	100.667	20	96	1	29	7.2	4.43	138	14	12.5	4.9	1	2	1	0
1103	0	5	36.6	71	128	81	96.6667	18	98	1	13	11.2	4.49	240	11.5	14.3	4.7	3.9	0	5	0
1104	0	4	38	104	124	95	104.667	20	95	2	4	8.7	4.54	332	14.2	8	4.3	1	2	2	0
1105	0	6	37	80	126	71	89.3333	19	99	1	3	36.9	5.11	335	16.4	12.4	5.4	5.4	5	2	1
1106	0	7	37.8	80	192	94	126.667	25	89	2	2	9.5	4.48	137	13.6	12.8	5	0.9	5	2	0
1107	0	5	33.2	101	212	105	140.667	19	97	12	21	11.8	2.34	153	5.9	16.7	4.4	1.9	5	1	1
1108	1	4	36.5	60	128	111	116.667	18	98	1	2	11.9	3.66	213	11	14.8	3.5	0.9	0	1	0
1109	0	6	36.5	101	117	83	94.3333	18	98	2	20	6.7	4.36	266	13.3	13.4	4.2	0.8	3	2	0
1110	0	2	36	119	144	102	116	25	91	4	0	28	3.69	346	12.8	12.8	3.9	1	0	5	0
1111	0	2	36	107	142	102	115.333	29	91	5	4	7.1	3.69	291	11.9	14.3	4.1	0.7	5	1	1
1112	0	5	38.2	109	117	71	86.3333	17	95	2	0	17.1	3.88	426	11.8	14.4	3.9	0.5	5	3	0
1113	0	1	35.5	124	126	94	104.667	18	94	3	3	20.3	3.29	138	10.2	12.7	4	0.8	0	5	0
1114	0	4	36.6	92	127	71	89.6667	20	96	1	11	7.4	4.73	184	14	13.6	4.1	0.8	1	5	0
1115	0	2	36	125	92	63	72.6667	12	96	3	3	10.5	3.32	48	10.3	14.8	3.3	0.8	0	1	0
1116	0	1	36.5	125	100	67	78	20	97	4	2	4	4.64	171	13.6	15.1	4.1	0.7	5	0	1
1117	0	5	36.5	80	125	81	95.6667	18	98	1	7	17.4	2.69	190	7	12	3.9	1.5	3	1	0
1118	0	5	37	97	176	110	132	16	97	2	1	13.3	3.15	201	10.3	12.7	4.2	1	5	3	0
1119	0	1	36.5	84	135	76	95.6667	20	100	1	1	10.2	3.64	213	9.5	14.3	4	6.4	5	4	0
1120	0	4	37.1	59	182	96	124.667	20	98	1	3	1.6	3.23	65	10.4	17.4	3.3	1.1	5	1	0
1121	1	6	36.5	91	182	90	120.667	21	97	2	1	24	3.69	203	10.4	13.3	4.3	1.1	0	5	0
1122	1	4	37.4	95	101	43	62.3333	20	95	1	12	5.1	4.28	169	12.6	13.9	4.3	0.8	5	0	0
1123	0	5	36.7	82	123	61	81.6667	19	92	1	1	5.6	3.5	201	10	16	4	3.3	1	2	0
1124	0	4	36.8	82	60	41	47.3333	20	93	1	4	11.9	2.99	144	8.4	10	4.3	3.7	5	2	0
1125	1	0	36	118	127	90	102.333	19	97	3	2	5.5	4.65	130	13.3	14.6	4.2	0.7	4	2	0
1126	1	5	37	82	160	98	118.667	18	95	3	1	15.7	2.59	192	7.8	13.9	4	1.5	5	2	0
1127	0	4	36.8	118	130	78	95.3333	16	100	3	3	17.2	4.59	215	12	8	3.6	0.8	1	4	0
1128	0	5	37.5	102	155	106	122.333	25	95	3	0	10.6	3.58	220	10.2	12.6	3.8	0.6	1	4	1
1129	0	4	36.9	72	141	87	105	15	96	1	4	3.3	3.81	99	10.9	16.2	5	3.2	1	4	0
1130	0	1	37	102	129	75	93	16	98	2	7	2.5	2.64	32	8.8	16.2	4.9	13.3	4	1	0
1131	0	3	38.3	92	158	94	115.333	20	92	1	4	11.1	4.23	197	13.7	12.6	4.5	1	1	4	0
1132	0	5	36.6	55	85	42	56.3333	17	95	2	5	12.9	3.98	231	11.2	13.3	3.5	0.7	5	1	0
1133	0	4	36.5	78	112	82	92	17	95	1	3	7.4	3.89	176	11.5	13.4	4.4	0.9	5	0	0
1134	0	6	37.2	84	143	79	100.333	17	98	1	13	10.2	3.26	102	9.4	6	4.2	0.9	5	3	0
1135	0	2	36.4	87	105	65	78.3333	25	88	2	5	11.9	3.88	157	12.4	6	3.9	0.6	1	4	0
1136	0	3	36.2	144	77	42	53.6667	30	89	10	19	22.4	5.23	239	15.5	16.1	5.5	6.4	5	2	1
1137	0	6	37	94	126	79	94.6667	25	88	2	16	7.9	2.44	163	8.7	14.7	4.5	4.4	5	1	0
1138	0	4	36.4	140	86	52	63.3333	34	85	10	7	9.7	3.78	317	11.7	12	4.7	1	3	5	1
1139	0	3	36.9	79	142	73	96	18	97	1	280	10.1	5.38	263	16	12.3	4	1	0	5	0
1140	0	3	36.8	103	141	64	89.6667	18	100	4	11	8.5	3.3	185	11.6	6	3.5	0.6	1	1	0
1141	0	7	36.5	82	190	101	130.667	22	94	4	1	6.2	4.76	71	15.3	13.5	4.2	0.9	1	4	0
1142	0	6	36.3	89	148	97	114	20	98	1	21	6.2	2.97	198	9.8	5	4.4	2.8	3	1	0
1143	0	2	37.2	111	112	78	89.3333	16	100	3	1	7.9	3.78	348	11.2	14.5	4.5	1.1	6	0	0
1144	0	4	37.6	101	144	88	106.667	19	98	2	5	13.4	4.35	180	13.2	13.5	3.6	0.8	3	2	0
1145	1	3	38	112	138	83	101.333	15	100	3	24	4.6	4.21	279	8.7	7	4.2	0.7	5	4	0
1146	0	5	35.5	92	75	35	48.3333	22	98	4	4	11.6	3.69	197	12.1	8	4.5	1.2	1	1	0
1147	1	4	36.5	87	113	97	102.333	18	81	4	28	10.6	4.16	216	12.2	15.5	4.1	0.7	5	5	1
1148	0	6	37.5	67	224	108	146.667	20	98	3	16	20.1	5.08	408	16.9	7	3.7	0.6	5	0	0
1149	0	5	37.2	76	132	88	102.667	15	100	1	15	24.9	3.15	51	9.4	16.2	3.7	5.8	0	5	0
1150	0	4	36.6	89	163	78	106.333	20	98	1	12	12.4	4.64	227	13.3	13.6	4.2	0.6	0	2	0
1151	0	3	38.3	78	133	75	94.3333	15	99	4	4	19.8	4.24	239	12.7	8	3.6	1.1	3	3	0
1152	1	5	37	81	190	98	128.667	16	98	1	16	19.7	3.61	196	11.7	13	4.9	1	5	1	0
1153	1	5	37	96	144	87	106	18	99	1	2	10.4	4.82	225	14.3	14.5	4.1	0.8	1	5	0
1154	1	5	37.9	75	166	94	118	25	95	2	3	10.5	3.58	194	10	14.3	4.8	1.6	5	1	0
1155	1	1	37.2	128	118	74	88.6667	20	100	3	11	14.2	5.03	291	15.6	8	4.2	0.8	5	5	0
1156	0	3	35.5	65	155	119	131	19	95	1	1	11.6	4.86	254	12.8	11	3.9	0.7	5	1	0
1157	0	2	35.8	82	114	64	80.6667	18	96	1	14	10.2	2.96	241	9.7	15.9	3.9	1.2	5	1	0
1158	0	1	36.7	91	137	76	96.3333	19	100	1	46	5.7	2.53	98	7.1	14.3	4.9	1.8	4	3	0
1159	0	4	36.5	82	149	80	103	18	98	1	2	14.7	3.8	164	11	7	4.2	2.7	5	5	0
1160	1	5	36.2	65	110	58	75.3333	20	86	2	25	8.9	3.85	362	11.2	13.8	3.9	0.6	1	0	1
1161	0	3	37.9	100	122	88	99.3333	29	93	2	26	9.7	5.39	204	14.7	13	3.3	0.5	5	5	0
1162	1	6	37	79	142	69	93.3333	18	95	2	30	16.6	4.46	328	13.5	14.1	3.9	0.7	0	0	0
1163	0	3	37.3	73	111	78	89	21	96	2	2	12.5	2.99	101	9.9	14	3.8	0.9	3	4	0
1164	0	3	36.5	78	122	78	92.6667	20	98	1	13	9.1	3.58	148	11.7	12.7	4.3	0.9	1	4	0
1165	0	2	36	70	120	80	93.3333	23	99	2	47	5.9	4.5	181	13.6	12.4	4.1	0.7	1	1	0
1166	0	1	36.7	65	148	97	114	20	100	2	1	7.3	4.1	208	13.2	11.9	4.2	0.9	1	4	0
1167	0	5	36	127	113	87	95.6667	27	90	4	24	12.6	4.17	273	13.7	13	3.8	0.7	5	2	0
1168	0	4	35.9	110	90	55	66.6667	30	92	5	24	12.6	5.95	225	16.9	16.8	4.7	1.3	4	1	0
1169	0	4	36.3	81	119	79	92.3333	20	100	1	1	9.1	3.8	222	12.3	12.1	4.1	0.5	5	5	0
1170	0	1	36.5	72	132	71	91.3333	15	100	3	2	6.6	4.6	141	13.9	12.4	4	0.9	5	1	0
1171	0	3	36.5	58	100	74	82.6667	20	98	2	16	24.9	4.02	266	11.9	5	3.9	0.8	5	1	0
1172	0	5	36.2	61	150	102	118	20	95	1	3	17.1	3.9	523	10.3	16.8	3.3	0.9	1	0	0
1173	1	4	36.5	108	240	82	134.667	20	100	4	2	14.6	3.58	350	10.5	15.3	3.9	1.5	1	4	0
1174	0	8	36.8	78	133	72	92.3333	25	97	2	5	9.5	4	176	12.3	12	4.7	1	5	5	0
1175	0	7	36.2	120	130	78	95.3333	25	92	5	53	4.8	2.85	207	8.8	14.3	4.4	0.9	5	5	0
1176	0	2	37.9	94	121	87	98.3333	14	98	0	2	10.5	3.88	226	12.1	12.4	4.2	0.8	4	2	0
1177	0	4	37.1	100	219	85	129.667	20	100	3	2	12.8	3.55	139	10.8	13.4	4	0.7	1	0	0
1178	1	2	37	128	117	62	80.3333	25	95	4	8	24.7	4.28	371	11.6	8	4.7	0.9	1	0	0
1179	0	2	37.7	85	128	79	95.3333	28	99	2	5	9.5	3.57	302	10.3	13.5	4.8	1.4	0	5	0
1180	1	6	37	83	116	60	78.6667	14	93	0	56	10.5	2.4	183	7.3	19.4	5.1	1.6	5	5	0
1181	1	4	37.5	110	125	102	109.667	19	98	2	6	7.9	3.85	291	10.9	14.4	4.8	0.7	5	5	0
1182	1	6	37.2	87	97	59	71.6667	20	92	2	25	6.9	4.84	270	14.3	13.6	3.6	0.9	0	0	0
1183	0	5	37	127	98	77	84	33	98	6	6	10.5	3.45	248	11	14.2	5	5.6	5	0	1
1184	1	4	33.7	120	71	59	63	22	62	11	2	15.5	3.32	225	10	18	4.4	0.6	5	1	1
1185	0	4	36.4	79	127	77	93.6667	20	98	2	5	8.4	3.81	247	12.6	12.9	4.7	0.8	3	5	0
1186	0	4	36.5	79	150	89	109.333	20	100	1	7	9.3	3.51	172	10.6	14.6	4.2	1.7	5	5	0
1187	0	2	36.4	66	138	97	110.667	20	99	1	6	11.2	2.83	197	9.3	14.6	4.2	1.2	5	2	0
1188	1	3	36.4	110	112	73	86	20	97	2	7	7.8	5.27	197	14.3	14.3	4	0.7	5	5	0
1189	0	6	36	88	179	110	133	16	96	2	7	3.6	3.41	230	8.2	9	4	1.8	1	2	0
1190	1	6	36.7	78	140	88	105.333	20	96	1	4	12.3	3.78	198	12.2	14.4	5.7	5.8	5	1	1
1191	0	4	36.4	78	124	78	93.3333	20	98	1	2	5.8	4.27	232	11.9	13.4	4.2	0.8	5	4	0
1192	0	2	36.6	102	124	55	78	30	95	4	3	9.1	4.26	88	13.7	13.6	4.1	1.2	5	1	1
1193	0	4	36.9	110	146	85	105.333	19	99	2	6	2.2	2.66	112	8.1	14.7	3.7	0.5	5	0	0
1194	1	5	37	75	124	83	96.6667	20	96	1	27	5.1	5.9	145	18.6	16.4	4	0.7	5	5	0
1195	0	2	37.3	85	141	81	101	19	96	1	28	6.4	4.71	214	15.1	13.3	4.3	1.1	6	4	0
1196	0	2	37.6	82	97	58	71	18	100	3	17	7.8	2.91	129	9.6	8	4.1	0.6	0	5	0
1197	0	2	37	125	148	101	116.667	28	100	4	2	21.5	5.84	356	17.4	13.2	3	1.1	0	4	0
1198	1	3	36.6	68	132	91	104.667	20	99	1	24	7.1	3.67	316	11.2	13.3	3.7	1.1	1	4	0
1199	0	4	36.9	69	181	97	125	16	100	1	50	22.7	6.34	914	13.7	15.3	4	1	5	5	0
1200	0	5	37.2	68	121	74	89.6667	20	98	1	22	10.9	3.98	139	11.9	13.1	4.6	1	3	0	0
1201	0	3	37.4	73	151	96	114.333	18	98	1	1	14.8	5.28	153	14.3	8	4.2	19	1	2	0
1202	0	4	37.9	92	151	88	109	18	96	1	14	8.4	2.22	192	6.9	14.3	4.2	0.9	4	3	0
1203	0	4	37.6	91	108	59	75.3333	21	99	3	4	22.3	2.37	343	7.1	8	4.9	4.7	1	1	0
1204	0	7	36.9	112	114	80	91.3333	16	83	3	24	18.8	3.9	174	11.8	13.8	4.2	0.5	5	2	0
1205	1	4	37.2	82	117	79	91.6667	20	99	1	21	22.4	3.87	162	11.9	12.4	4.3	0.9	1	0	0
1206	1	5	37	70	165	92	116.333	12	92	0	5	15.3	3.59	279	10.5	13.5	4.6	0.9	5	5	0
1207	0	4	36.3	106	137	94	108.333	18	98	2	20	12.8	4.65	263	13.6	4	3.9	0.9	5	5	0
1208	0	3	37	103	114	69	84	16	88	2	19	46.6	4.24	94	12.7	14.3	4.4	2.1	1	4	0
1209	0	5	36.5	97	151	87	108.333	23	95	2	8	8.1	4.41	156	12.9	13.6	4.3	1	5	0	0
1210	0	4	28	1216	129	186	116	20	71	12	14	15.2	4.08	181	11.6	15	2.9	2.4	1	4	1
1211	0	4	36.5	60	126	70	88.6667	20	98	1	24	7.2	4.82	166	14.1	14	4	1	5	5	0
1212	0	6	35	80	151	85	107	18	89	2	9	8	4.76	158	14.6	12.6	4.2	1	6	5	0
1213	0	3	37	89	96	70	78.6667	22	89	3	35	9.8	3.73	267	10.5	14.4	5	1	5	5	0
1214	1	5	37.4	100	98	65	76	20	99	2	1	14.8	4	77	11.6	14.8	2.7	2.3	0	0	0
1215	0	1	36.3	77	98	61	73.3333	21	99	3	0	8.6	3.95	149	11.1	14.8	3.9	0.3	3	0	0
1216	1	6	38.2	71	109	55	73	16	94	2	3	3.8	3.36	273	8.8	7	3.3	0.6	5	5	0
1217	0	3	36.1	76	125	86	99	20	100	1	3	15.2	3.83	324	11.7	13.2	3.9	1	5	1	0
1218	0	5	36.8	82	153	88	109.667	22	99	2	4	17.7	4.35	243	12.8	6	3.3	1.3	0	1	0
1219	1	1	36.8	86	129	90	103	25	98	2	4	11.6	4.58	346	12.7	12.7	4	0.9	1	1	0
1220	0	4	37.8	83	137	100	112.333	20	100	1	3	10.1	3.85	186	12	14.1	4.6	1.1	1	4	0
1221	0	5	36.8	89	142	78	99.3333	18	96	1	3	8.6	2.81	248	7.8	17.1	4.2	0.8	1	5	0
1222	1	4	36.4	62	157	115	129	19	96	3	29	10	4.28	148	12.2	13	3.6	0.7	5	1	0
1223	0	4	36.8	71	123	82	95.6667	19	100	1	11	13.6	4.78	179	14.8	14.3	3.8	0.9	1	0	0
1224	1	5	36.2	111	122	63	82.6667	35	63	5	2	15	2.64	159	8.2	12.6	3.5	0.7	1	4	1
1225	0	2	36.6	105	98	61	73.3333	25	95	4	4	7.4	4.24	329	10.8	16.7	3.9	1.3	1	4	0
1226	1	0	37.2	109	120	74	89.3333	16	98	4	1	4.3	3.58	218	11.2	14.2	3	1	5	0	0
1227	0	4	36.4	77	198	116	143.333	21	96	3	1	7.9	3.6	120	11.3	13.2	4	1	5	0	0
1228	1	3	37.2	87	111	75	87	16	98	1	3	8.9	4.96	443	14.7	13.1	5.2	0.8	1	4	0
1229	1	4	37.9	88	131	92	105	20	99	1	40	14.7	4.87	309	13.4	13.4	4.8	1.1	5	1	0
1230	1	5	36.4	79	153	85	107.667	18	95	1	22	7.7	4.16	184	13.3	14.5	4.3	0.7	5	2	0
1231	0	0	35.6	121	142	116	137	20	71	10	3	15	2.62	167	8.7	17.6	4.3	5	5	1	1
1232	0	4	36.5	87	112	75	87.3333	15	91	1	1	20.6	6.19	152	17.7	15.7	4	1.6	5	5	0
1233	0	3	36.7	91	192	98	129.333	20	99	3	4	8.7	3.47	223	10.5	12.8	4.2	1	5	2	0
1234	1	4	37.8	98	139	112	121	20	96	1	11	13	4.48	298	14.3	13.6	4.3	0.7	0	5	0
1235	1	5	37	74	126	66	86	25	99	2	4	10.9	3.62	228	11.1	5	3.5	0.6	5	1	0
1236	0	1	37.1	92	134	90	104.667	25	97	2	2	9.7	4.59	277	14.2	13.2	4.5	0.9	5	5	0
1237	0	6	36.4	108	158	93	114.667	20	99	2	14	5.2	3.32	183	9.9	12.9	4.3	0.6	5	2	0
1238	1	2	36.3	68	97	56	69.6667	13	99	1	5	13	3.66	239	11	12.6	3.8	0.6	0	1	0
1239	0	5	36.8	75	96	64	74.6667	21	95	3	18	13.4	4.57	271	14.4	13.8	3	1.3	5	5	0
1240	1	4	37.9	117	124	69	87.3333	21	97	4	1	13.3	4.21	274	13.1	9	3.5	0.5	0	5	0
1241	0	2	37.4	90	136	75	95.3333	20	98	1	11	12	4	205	10.7	15.6	4.9	0.9	5	5	0
1242	0	5	36.8	66	170	89	116	16	98	1	5	6.2	4.61	107	11.6	19	5	1.3	1	4	0
1243	1	3	37.9	73	125	78	93.6667	16	95	1	3	17.6	4.19	470	12.6	16.5	3.3	1	5	5	0
1244	0	5	36.4	60	167	89	115	20	100	3	1	8	4.14	265	11.8	14.8	4.4	0.9	5	1	0
1245	1	0	36.8	79	125	71	89	20	100	2	1	14.3	3.91	242	13	12.2	4.6	0.6	0	1	0
1246	0	4	36.5	88	125	85	98.3333	20	96	1	4	10.3	4.05	422	12.7	12.8	4.6	1.2	4	5	0
1247	0	4	37	76	134	99	110.667	20	99	1	2	15.1	5.11	257	15.6	13	3.8	0.7	5	2	0
1248	1	4	37.4	90	112	74	86.6667	20	95	1	4	21.8	4.59	294	12.4	13	4.5	0.9	0	1	0
1249	0	2	36.5	70	186	102	130	18	97	1	21	12.3	4.41	90	13.3	13.6	4.5	0.6	1	4	0
1250	0	5	36.9	150	165	140	148.333	14	83	6	12	8.4	2.32	121	7	14.3	4.2	0.6	5	4	0
1251	0	2	36.4	95	119	77	91	17	96	1	4	10.2	3.3	309	8.8	18.2	4.1	1.3	5	5	0
1252	0	0	35	101	128	82	97.3333	20	98	5	1	13.3	4.48	342	13.9	12.7	4.2	1.1	1	4	0
1253	0	2	37.4	90	143	78	99.6667	18	97	2	3	6.6	3.83	251	11.4	14.7	3.4	0.8	0	5	0
1254	0	4	36.8	68	121	80	93.6667	15	96	4	10	8.4	3.74	142	11.9	13.1	4.1	0.4	1	1	0
1255	0	7	37	88	148	78	101.333	18	99	3	0	7.9	3.27	55	11.1	14	4.4	0.8	1	4	0
1256	0	3	36.5	87	181	150	160.333	20	100	1	2	18.1	4.66	179	13.3	13.1	3.2	0.6	5	2	0
1257	0	5	38	103	158	108	124.667	19	91	2	44	9	4.74	181	16.1	6	4	0.7	0	5	0
1258	1	7	36.8	96	141	107	118.333	15	95	3	3	4.9	1.65	71	5.4	13	3.2	0.7	6	2	0
1259	0	5	35.4	113	120	84	96	13	99	5	2	36.5	2.98	115	9.4	15	4	1.2	5	2	0
1260	0	5	37.5	58	183	85	117.667	27	91	4	3	7.2	3.36	173	10.7	14.3	4.9	1.1	0	0	0
1261	1	6	36.5	80	185	86	119	25	99	5	2	7.8	3.58	270	10.7	13.8	4.8	2.5	0	5	0
1262	0	4	38.7	93	139	89	105.667	13	97	1	3	13.9	3.47	91	10.6	14.4	3.6	5.1	0	2	0
1263	0	5	36	64	151	68	95.6667	20	95	1	16	15.5	3.36	113	8.7	16.5	4.5	2.8	5	1	0
1264	0	4	36.4	94	125	88	100.333	18	98	1	4	9.2	4.39	194	13.4	13.8	4	0.8	5	1	0
1265	0	5	36.4	87	111	72	85	15	100	1	7	8.1	4.59	156	12.2	12.8	4.7	0.8	5	0	0
1266	0	4	36.7	67	126	60	82	24	97	2	4	6.8	4.7	278	13.5	12	3.6	0.7	1	2	0
1267	1	2	36.2	79	96	58	70.6667	16	100	2	15	10.5	5.35	167	16.2	14.3	4.8	0.9	5	5	0
1268	1	3	36.7	88	90	67	74.6667	18	92	2	17	11.7	4.69	227	14.2	12.2			5	5	0
1269	0	5	36.5	65	72	45	54	25	96	4	2	10.7	3.91	229	11.5	14.6	3.5	0.5	5	0	0
1270	0	3	36.5	63	146	97	113.333	20	97	1	22	11.8	2.72	97	9	9	4.3	1.6	5	4	0
1271	1	3	38.6	112	125	68	87	22	96	4	6	14.6	4.8	343	12.3	6	3.2	0.6	0	5	0
1272	0	4	36	139	92	58	69.3333	25	97	8	2	14.6	4.64	333	13.6	9	4	0.7	5	1	0
1273	0	4	38.8	128	133	75	94.3333	25	100	8	0	8.3	3.89	271	12.1	13.5	3.4	1.1	1	5	1
1274	0	6	37	60	166	87	113.333	15	100	1	0	14.1	4.21	181	12.5	14.4	4.9	0.6	5	5	0
1275	1	3	36.8	70	219	139	165.667	18	92	5	1	3.4	4	81	12.5	14	4.5	5.5	5	0	1
1276	1	1	36.2	93	136	68	90.6667	21	100	2	14	30.5	4.97	190	15.5	12.3	3.4	1.2	5	1	0
1277	0	3	36.9	71	115	87	96.3333	21	94	2	25	13.4	4.09	378	12.6	13.5	4.5	0.7	5	5	0
1278	0	5	38.6	72	127	85	99	20	94	2	6	11.9	3.44	186	10.8	13	3.5	2.2	1	4	0
1279	1	5	37.5	70	122	77	92	16	96	1	1					7			5	0	0
1280	0	5	37	62	140	82	101.333	18	95	1	2	15.2	3.6	187	10.2	15.9	4.1	1.1	1	4	0
1281	0	2	37	92	119	77	91	22	91	2	3	10.3	5.05	141	15.4	7	4.5	1.3	1	1	0
1282	0	4	35.2	123	148	123	126	20	71	7	4	6.3	4.4	238	11.5	15.7	4.1	1.1	5	5	1
1283	0	3	37	60	127	97	107	17	98	1	2	15.3	4.77	217	16	12.7	3.7	1	2	0	0
1284	1	3	36.6	109	121	75	90.3333	26	100	3	9	11.3	3.81	213	11.6	13	3.8	0.7	1	0	0
1285	0	4	36.4	60	90	64	72.6667	20	100	2	4	4.7	4.59	230	14.2	12.2	4.1	0.8	1	1	0
1286	0	4	36.5	60	122	75	90.6667	18	99	1	24	15.1	5.14	311	14.9	16.1	3	3	0	4	0
1287	0	4	36.4	76	133	84	100.333	19	98	1	10	9.9	5.67	233	17.7	13	3.7	1.2	0	5	0
1288	0	6	36.5	87	115	63	80.3333	20	99	1	12	6.9	4.41	219	14.1	9	4	0.7	4	1	0
1289	0	6	36.8	64	193	99	130.333	18	95	2	2	11.4	4.8	185	14.6	14.2	4	2.1	2	5	0
1290	1	3	36.2	68	146	92	110	20	98	1	2	9.6	3.43	391	8.8	9	3.8	0.9	2	2	0
1291	0	3	36.5	90	137	98	111	18	98	1	14	10.2	4.13	146	12.6	13.5	4.4	0.8	3	0	0
1292	1	1	36.1	79	110	74	86	27	100	2	3	12.4	3.98	169	11.5	12.6	3.8	0.6	0	5	0
1293	0	2	36	85	58	35	42.6667	18	98	2	4	12.4	4.12	228	13	6	4.1	1.5	2	4	0
1294	0	6	37.6	115	104	73	83.3333	30	99	5	100	7.1	3.69	160	11.6	6	4.9	3.4	5	5	0
1295	0	1	37.3	77	132	79	96.6667	20	100	1	2	9.8	3.61	228	9.1	8	4.4	0.9	0	0	0
1296	0	4	36.5	117	139	91	107	19	98	5	18	21.5	3.5	42	7.9	5.3	4	1.9	2	1	0
1297	0	3	36.1	110	133	83	99.6667	18	88	2	5	14	3.58	215	12.2	11.9	3	0.6	4	4	0
1298	0	3	37.6	70	147	106	119.667	33	98	3	3	17.2	4.54	217	13.4	17.3	4.2	1	2	4	1
1299	0	5	36.7	76	131	78	95.6667	15	100	1	1	6.4	3.8	264	10.3	15.7	3.3	0.9	4	1	0
1300	1	8	36.8	104	163	91	115	19	97	2	13	7.5	3.63	200	10.1	14.1	4	0.6	2	1	0
1301	0	7	36	70	179	76	110.333	18	99	1	6	7.1	3.72	183	11.2	15.4	5.1	1.2	4	4	0
1302	0	4	37.5	93	134	84	100.667	18	96	1	2	8.2	5.57	309	16.7	12.4	5.5	1.1	2	1	0
1303	1	7	37.2	76	155	62	93	18	97	1	16	21.3	3.27	454	8.8	7	2.6	1.2	2	4	0
1304	0	3	36.8	79	143	86	105	11	95	0	2	10.4	3.79	200	10	16	4.3	0.7	2	1	0
1305	0	5	36.7	53	125	78	93.6667	15	100	1	7	3.5	1.16	58	3.8	7	4.2	0.3	2	2	0
1306	0	2	35.7	92	141	99	113	17	96	1	5	7.7	5.29	345	15.7	13.8	4	0.8	2	5	0
1307	0	5	36.8	124	94	60	71.3333	35	100	5	4	5.5	4.47		14.6	12.1	4.4	0.8	2	1	1
1308	0	6	37.3	89	159	109	125.667	20	97	2	2	6.7	3.97	251	11.9	7	4.4	1.1	0	1	0
1309	1	4	37	70	139	84	102.333	25	97	2	1	7.6	2.54	73	8.4	12	3.3	2.3	5	5	0
1310	1	5	37.7	72	147	77	100.333	19	100	1	1	13.4	4.58	300	13.4	6	4.1	0.8	6	5	0
1311	1	5	37.9	88	146	75	98.6667	18	94	1	13	7.5	5.38	209	16.6	7	3.3	1.1	6	5	0
1312	0	6	36.2	89	203	108	139.667	20	97	3	16	11.8	3.79	256	10.4	7	4.1	2	0	1	0
1313	0	3	36	58	163	87	112.333	18	95	1	3	9.6	3.87	104	11.9	14.1	3.3	0.8	0	1	0
1314	0	6	38.4	111	161	98	119	21	92	4	1	8.1	3.26	179	10.6	13.5	3.7	1.3	0	2	0
1315	0	5	37.1	70	119	68	85	24	98	2	15	7.9	4.29	182	14.7	13.8	4.9	0.8	2	5	0
1316	0	3	39	145	131	68	89	30	96	7	2	6.2	4.09	159	12.8	12.8	3.6	0.9	2	5	0
1317	1	1	35.8	72	97	69	78.3333	26	100	5	3	7.7	3.64	273	12.7	14.5	4.4	1.1	4	0	0
1318	1	5	38.5	137	209	131	157	61	90	11	29	6.4	4.51	271	13.5	13.2	3.9	0.6	4	0	1
1319	0	4	38	102	149	90	109.667	20	98	2	2	7.8	4.02	164	12.4	6	3.7	0.9	2	4	0
1320	0	7	36.8	76	144	77	99.3333	18	98	1	3	13.7	5.09	243	16.9	14.1	3.9	0.8	4	4	1
1321	0	0	36.8	100	144	89	107.333	19	100	1	19	8.1	2.64	226	7.9	14.7	4.6	3	2	4	0
1322	1	2	37.7	96	121	76	91	17	99	1	2	6.7	3.9	220	12.1	7	3.7	1	4	0	0
1323	0	8	36.8	98	185	78	113.667	18	98	1	67	5.5	4.34	182	12.9	14.1	4.3	1.4	4	0	0
1324	1	5	38	82	128	75	92.6667	18	99	1	1	7.7	3.7	409	11	12.8	4.4	1	2	4	0
1325	1	5	36.9	65	165	93	117	16	98	1	4	15.8	2.46	162	7.5	12	3.3	0.5	4	1	0
1326	0	1	37	64	124	71	88.6667	14	100	0	3	13.9	4.16	274	11.7	4	4.3	1.2	4	2	0
1327	0	4	38.3	105	153	94	113.667	18	100	2	5	3.8	4.2	301	11.9	12.2	4	0.5	4	4	0
1328	1	2	37.7	78	122	73	89.3333	19	96	1	1	13.6	4.23	336	9.1	7	3.8	0.8	2	2	0
1329	0	4	37	98	138	77	97.3333	15	98	1	1	9.3	4.33	269	13.6	13.9	4.7	1	2	1	0
1330	0	5	37.6	77	109	77	87.6667	20	96	1	6	14.5	3.81	332	10.4	7	4	1.5	2	1	0
1331	0	5	38.1	115	111	74	86.3333	20	93	3	3	17.3	2.95	188	8.9	7	4.1	1	2	1	0
1332	0	5	36.8	81	140	89	106	20	92	1	5	10.3	3.7	274	11.4	17.1	3.5	0.8	2	4	0
1333	0	4	38.2	92	124	75	91.3333	18	95	1	4	19	5.41	317	15.6	6	2.5	0.5	0	1	0
1334	0	5	37.1	86	125	86	99	15	100	1	12	8.1	4.1	189	12.2	13.5	4.6	1.5	2	1	0
1335	0	5	36.4	74	134	87	102.667	22	98	2	6	23.2	3.68	246	11.3	12.7	3	0.5	4	4	0
1336	0	3	36.9	88	88	67	74	25	91	3	4	22.3	4.46	295	13.8	13.6	4.2	1.4	4	5	0
1337	1	1	37.1	78	115	78	90.3333	18	98	1	0	7.6	4.72	137	15.6	15.5	4.5	1.1	2	4	0
1338	1	3	36.8	78	115	78	90.3333	18	100	1	15	8.7	2.51	109	8.6	15.3	4.8	1.6	4	1	0
1339	0	3	37.5	118	120	79	92.6667	32	97	5	10	6.4	3.22	547	9.5	16.7	3.5	1.4	4	5	1
1340	1	4	37.5	79	130	80	96.6667	15	96	1	1	13.7	3.96	403	12.5	13.6	4.4	1.4	0	0	0
1341	0	1	36.2	98	149	91	110.333	16	98	1	1	7.9	5.04	221	15.7	7	4	1.5	2	0	0
1342	0	4	37.5	79	165	89	114.333	20	97	1	1	8.6	5.47	120	17.2	6	4.8	0.8	2	1	0
1343	0	2	37.4	102	109	62	77.6667	19	97	2	7	7.9	2.8	248	8.8	7	4	2.7	0	5	0
1344	0	4	36	130	96	68	77.3333	25	80	8	4	5	3.85	410	12.8	14.9	5	0.7	2	2	0
1345	0	4	37.7	63	155	98	117	19	100	1	2	9.3	3.03	535	6.2	19.1	4.2	0.9	2	4	0
1346	1	5	36.6	71	176	84	114.667	23	97	2	3	9.9	2.79	228	8.2	8	3.9	6.2	2	2	0
1347	1	4	38.2	102	147	83	104.333	28	98	5	3	13.8	4.26	353	12.5	14.5	4	1.2	2	0	0
1348	1	4	36.8	75	106	60	75.3333	28	99	2	12	12	5.72	151	17.1	9	3.6	0.9	0	5	0
1349	1	6	36.6	119	89	58	68.3333	20	100	4	5	13.4	4.63	189	14.1	8	4.3	0.8	4	1	0
1350	1	4	37.7	97	132	88	102.667	20	100	1	1	9.9	4.22	170	13.2	17	4.8	1.3	3	5	0
1351	1	5	37.3	84	154	87	109.333	20	97	1	22	13.2	4.1	340	12	12.7	3.7	1.1	2	0	0
1352	0	3	36	128	154	116	123	20	71	6	1	8.6	4.04	191	13.4	18.8	4.5	5.6	2	5	1
1353	0	3	36.3	66	120	74	89.3333	20	100	1	4	7.4	4.4	45	12.8	8	4.1	0.7	2	5	0
1354	0	6	37.2	111	153	85	107.667	27	90	4	5	10.1	3.35	171	11.3	6	4.4	0.4	2	4	0
1355	0	2	38.1	91	129	69	89	14	98	0	19	9.8	3.77	198	12	12.7	3.6	0.8	2	0	0
1356	0	6	37.8	112	105	67	79.6667	20	93	3	1	0.2	2.79	30	9	7	3.6	1.6	2	2	0
1357	0	2	37.2	66	117	81	93	20	98	1	16	7	4.37	115	12.9	13.5	3.7	1.3	2	4	0
1358	0	3	37.3	73	113	65	81	15	100	1	13	6.9	2.86	181	6.8	16	3.4	1	4	5	0
1359	0	3	37.8	84	107	68	81	20	99	1	11	4	4.13	175	11.1	7	3.4	0.8	2	1	0
1360	1	2	36.5	71	95	67	76.3333	20	100	3	4	8.3	4.44	234	13.9	8	4	0.5	2	5	0
1361	0	0	36.8	68	153	78	103	18	100	2	1	9.3	4.02	278	12.4	13.5	4.6	0.8	4	1	0
1362	0	5	37.5	76	172	88	116	18	100	1	42	12	4.64	309	14.1	15.4	3.9	0.7	0	5	0
1363	0	5	37.9	91	137	99	111.667	15	98	3	81	9	4.6	407	13.1	7	4.3	0.6	4	1	0
1364	0	4	37.2	70	164	104	124	21	98	2	3	9.9	4.74	237	14.3	12.3	3	1.9	4	2	0
1365	0	3	36.5	81	121	69	86.3333	11	96	0	7	14.2	4.37	280	11.8	14.4	3.9	0.9	2	0	0
1366	1	4	35.4	117	125	67	86.3333	25	100	4	3	11.7	3.92	171	11.8	15.9	4.6	6.1	2	1	0
1367	1	5	36.8	69	182	101	128	20	100	1	4	7.3	3.29	123	10.4	13.2	4.4	0.5	4	0	0
1368	1	6	37.1	112	170	110	130	25	95	4	52	14.3	2.9	162	9.1	12.4	4.3	4.9	2	0	1
1369	1	4	37.2	81	134	74	94	22	99	2	6	12.8	3.82	407	10.5	14	5.1	0.7	2	0	0
1370	0	2	37.3	76	139	95	109.667	13	100	0	0	19.7	4.31	363	14.3	12.7	4	0.5	4	1	0
1371	0	4	37.8	88	147	93	111	18	96	1	2	15.8	3.14	330	9.7	16.5	5	11.8	4	5	0
1372	0	6	37.6	106	119	69	85.6667	18	95	2	2	3.9	3.06	95	9.8	16.7	2	4.9	2	1	0
1373	0	6	36	94	154	95	114.667	20	96	1	5	16.7	5.61	340	16.4	12.8	3.7	0.9	0	2	0
1374	1	3	37.8	81	100	60	73.3333	20	98	3	2	18.6	3.71	142	12.1	14.2	4	1.4	2	4	0
1375	0	2	37.5	88	146	93	110.667	23	98	2	20	9.2	4.47	402	14.4	9	4	0.5	3	1	0
1376	0	1	36.5	53	142	80	100.667	25	98	3	5	7.1	2.76	156	9.5	14.1	4.3	0.8	4	4	0
1377	0	1	36.5	96	151	100	117	20	93	3	11	8.9	4.46	197	14.1	11.9	3.6	0.7	4	4	0
1378	0	3	37	118	102	54	70	30	91	5	9	21	4.83	52	13.9	6	4.3	1.2	2	4	0
1379	0	6	36	120	130	66	87.3333	15	96	3	5	14.4	4.17	71	11.7	13.5	2.7	0.9	2	1	0
1380	0	4	37.3	106	112	74	86.6667	19	93	2	21	19.1	4.12	164	11	14	4.2	1.4	2	2	0
1381	0	4	36.7	61	156	82	106.667	22	100	4	2					6			0	5	0
1382	0	2	36.5	89	125	78	93.6667	16	98	1	5	10.6	5.03	271	15.3	13.9	2.7	1.1	2	4	0
1383	0	5	38.4	121	142	117	122	20	71	3	14	6.4	3.4	215	11.1	14.4	3.9	0.4	4	4	1
1384	0	1	36.1	100	132	90	104	19	96	2	12	3.9	3.4	163	11.7	17.5	3.4	1.2	2	4	0
1385	0	3	37	78	138	90	106	26	95	2	4	22.4	3.59	95	10.9	7	3.7	1.5	2	1	0
1386	0	4	36.8	88	127	87	100.333	24	96	4	4	11.6	3.32	93	9.7	8	4.9	1.3	4	5	0
1387	1	0	37.1	87	112	72	85.3333	17	97	1	5	4.7	4.31	222	9.5	14.1	4.3	1.3	0	5	0
1388	0	3	35	125	50	37	41.3333	13	92	8	36	10.1	3.81	212	10.2	16.4	4.8	7.4	2	4	1
1389	1	7	36.2	127	81	54	63	20	98	5	5	15.4	4.45	240	13	12.5	4.2	1	2	0	1
1390	0	0	37	91	135	73	93.6667	19	98	1	4	11.2	4.62	166	14	12	4.2	0.9	4	1	0
1391	0	5	37.6	79	139	82	101	13	97	0	2	16.7	3.76	260	11.8	13.7	3.2	0.6	4	1	0
1392	1	4	37.6	76	126	66	86	18	97	1	6	13.8	3.31	421	10	13.7	3	2.1	0	1	0
1393	0	1	38.6	82	100	41	60.6667	15	98	4	1	14.5	3.78	69	11.5	13.4	4	1.3	2	4	0
1394	0	6	37.4	78	160	81	107.333	20	98	1	3	14.5	3.87	664	11.6	14.1	4.2	0.8	3	3	0
1395	0	5	36	100	186	164	171.333	17	97	3	3	14.9	4.85	303	13.6	7	3.1	1.1	4	4	0
1396	0	6	37.2	64	123	72	89	19	98	1	6	5.8	3.9	180	10.9	13.3	4.3	2.1	4	3	0
1397	1	3	36.5	84	99	58	71.6667	20	98	2	8	15.1	3.5	218	9	15.6	3.9	0.7	4	0	0
1398	0	1	36	146	102	66	78	37	100	7	2	5.6	3.34	62	10.9	19.2	4.1	3.4	3	3	1
1399	0	3	36.8	87	142	81	101.333	20	100	1	17	7.2	4.26	278	13.2	12.3	4.2	0.5	2	1	0
1400	0	6	37	80	107	81	89.6667	27	100	2	20	12	4.11	277	12.2	14.7	4.1	1.7	4	1	0
1401	1	4	37	78	184	104	130.667	25	98	2	1	12.2	4.18	273	13.5	6	3.4	0.9	0	5	0
1402	0	2	37.3	73	121	87	98.3333	19	100	2	12	7.3	4.29	245	14.1	13.1	4	1.1	4	0	0
1403	0	4	36.5	75	120	85	96.6667	25	100	2	4	10.6	3.38	278	8.3	15.9			2	4	0
1404	0	6	36.8	96	66	45	52	22	98	5	2	7.4	2.1	83	6.2	13.6	4.5	2.8	0	0	0
1405	0	6	36.1	64	97	62	73.6667	20	93	2	16	12.8	4.51	247	13.7	13.7	4.4	0.8	4	3	0
1406	0	1	36.4	67	119	62	81	15	96	2	13	14.2	5.29	240	16.2	13.5	4.2	1.2	4	4	0
1407	0	3	36.5	86	140	90	106.667	20	100	1	7	6.6	3.73	536	11.6	14.8	4.3	0.5	2	1	0
1408	1	2	36.8	84	109	66	80.3333	18	100	1	4	9.3	4.23	180	11.9	6	4.8	1.2	0	1	0
1409	0	5	36.5	85	97	65	75.6667	23	85	3	17	14.1	4.29	196	13	4	3.9	1.9	2	4	0
1410	0	3	36.2	89	132	81	98	18	96	1	6	0.1	3.13	44	9.1	6	4.3	0.9	4	3	0
1411	0	4	38.9	101	129	78	95	20	98	3	3	9.6	4.07	251	12.6	12.2	4	0.9	2	1	0
1412	0	4	39.7	102	133	88	103	32	96	5	282	7.2	4.01	153	12.6	7	3.9	1.1	2	2	0
1413	1	5	36.9	95	143	102	115.667	20	89	1	7	8.2	3.35	199	10.4	12.4	3.2	0.5	2	1	0
1414	0	3	36.5	94	126	80	95.3333	16	99	1	12	10.8	4.87	210	13.4	13.9	4.2	0.9	2	4	0
1415	0	3	36.7	111	137	74	95	26	92	4	2	0.5	2.08	24	7	12	4	1	4	4	0
1416	0	4	36.8	78	134	69	90.6667	20	95	1	4	26.4	3.72	163	11.3	15.7	5.7	6.5	2	2	1
1417	0	3	36.6	102	118	82	94	28	90	3	16	10.4	3.36	137	11.6	6	4.4	1.5	2	0	0
1418	0	2	36.7	78	114	78	90	18	100	1	23	7.8	4.29	158	13.7	12.5	3.8	0.7	2	2	0
1419	0	4	35.6	128	126	60	82	20	92	3	2	17	4.67	202	15.4	12.6	3.8	0.8	4	0	1
1420	0	4	37.2	81	120	61	80.6667	20	100	1	2	5.7	3.42	165	12.1	13.6	4	0.6	0	5	0
1421	0	2	38	80	112	64	80	15	96	2	19	9.5	5.57	237	15.3	12.6	4	0.8	3	1	0
1422	0	3	37.5	83	131	59	83	23	100	2	21	39.3	4.48	185	14.9	12.1	4.3	1	2	0	0
1423	0	1	37.1	91	131	81	97.6667	19	95	1	3	14.5	4.55	267	14.3	5	3.7	0.7	4	4	0
1424	0	4	37.7	71	115	80	91.6667	20	99	1	16	14.4	4.92	269	13.4	14.3	4.5	1.2	2	4	0
1425	0	4	35	63	122	63	82.6667	38	96	5	2	5.5	3.56	123	10.9	13.4	4.4	1.9	0	5	0
1426	0	1	37.2	110	152	76	101.333	21	98	5	45	5.9	3.05	171	9.3	12.4	4.9	1.3	2	1	0
1427	0	1	37.3	112	132	82	98.6667	25	87	4	10	10.9	4.22	164	11.7	13.4	3.8	0.8	0	2	0
1428	0	4	37	89	137	94	108.333	18	99	2	0	12	3.97	251	10.5	7	3.8	0.7	2	1	0
1429	0	5	37.2	73	171	109	129.667	13	95	0	3	24.2	3.45	359	11.4	11	3.9	1.2	2	0	0
1430	0	7	36	84	161	67	98.3333	26	92	2	4	11.2	4.33	151	14.2	13.5	4	0.6	2	0	0
1431	1	3	37	79	110	51	70.6667	12	100	3	1	8.6	4.5	174	12.8	12.8	4	1.4	4	1	0
1432	1	5	36.8	57	120	69	86	20	100	1	3	12.7	2.81	131	7.5	13.7	4	3.8	4	4	0
1433	0	4	36.4	75	125	64	84.3333	12	95	3	26	11	3.15	289	10.1	12	3.5	0.8	3	5	0
1434	0	4	37.3	66	132	79	96.6667	19	98	1	3	13	4.43	238	13.4	7	4.5	1.3	4	4	0
1435	0	4	37.9	120	96	46	62.6667	30	96	6	1	8.5	4.67	232	13.6	14.3	3.4	1.6	2	1	0
1436	0	3	36.1	68	92	52	65.3333	11	100	1	7	11.8	2.86	149	8.9	14.5	4.4	0.8	4	4	0
1437	0	5	36.8	81	126	72	90	20	100	1	19	9	4.39	183	13.4	13.7	4.2	0.9	2	4	0
1438	0	4	37.9	91	112	73	86	16	98	1	1	7.8	5.8	259	16.6	8	4.8	1.9	2	1	0
1439	0	1	40	127	92	57	68.6667	18	100	5	7	8.1	4.43	164	12.3	15.2	4.1	1	2	1	0
1440	1	5	35.8	75	150	87	108	16	91	3	12	11.9	2.7	176	8.7	13.7	3.8	0.5	4	2	0
1441	0	2	36.8	67	136	83	100.667	20	97	1	10	7.9	4.29	161	11.1	7	4.5	1.2	2	0	0
1442	0	6	36.5	88	180	92	121.333	16	96	1	5	7.2	4.81	198	14.7	12.9	4.4	0.9	2	1	0
1443	0	1	36.9	78	135	70	91.6667	20	100	1	3	9.8	2.35	223	7.1	12.9	4.3	0.7	1	1	0
1444	0	4	37.1	94	97	53	67.6667	24	95	4	16	0.7	2.18	100	7.8	7	4	7.7	0	5	0
1445	0	3	36.5	89	120	75	90	18	98	1	4	13.9	5.26	207	15.8	13.3	4.5	0.8	2	4	0
1446	1	4	36.4	64	126	73	90.6667	20	95	2	2	10.3	3.95	187	11.5	14.6	3.2	0.9	3	5	1
1447	0	7	37.3	69	107	94	98.3333	20	94	1	2	15.9	3.07	398	8.3	8	3.9	1.2	1	2	0
1448	0	4	37.4	75	130	73	92	15	91	1	7	27.5	4.85	110	13.4	13.2	4.5	0.6	1	0	0
1449	0	6	36	66	91	53	65.6667	16	96	2	5	14.2	3.66	192	11.3	16.6	4.6	1.4	0	5	0
1450	0	4	37.2	84	154	93	113.333	20	100	1	0	10.2	4.09	243	11.9	14	3.9	0.6	2	2	0
1451	0	2	37.8	90	114	78	90	16	98	4	1	21	3.15	207	9.4	19.2	3.8	1.2	2	4	0
1452	0	3	36.7	133	116	81	92.6667	20	94	4	3	13.7	2.7	164	7.1	16.2	4.1	0.9	6	5	0
1453	0	3	37.5	152	103	54	70.3333	33	95	7	3	7.7	3.05	237	9.1	5	3.9	2.4	0	5	0
1454	1	7	36.8	71	153	105	121	20	98	1	19	19.9	4.5	215	15	12.6	4.2	1.1	1	2	0
1455	0	5	36.7	92	94	76	82	20	95	2	5	14.6	4.81	294	14.5	13.5	3.4	1	1	4	0
1456	0	4	37.3	86	138	64	88.6667	20	96	1	5	12.3	3.95	166	12.1	13.4	4	1.2	2	4	0
1457	0	5	37.1	82	116	70	85.3333	20	89	1	13	8.3	3.94	223	12.3	13.7	4	0.9	4	1	0
1458	1	6	37.2	99	211	92	131.667	20	91	1	2	4.9	3.65	189	11.1	6	3.7	0.7	2	2	0
1459	0	3	37.1	96	118	73	88	12	94	1	7	10.9	3.27	156	11.7	8	4.4	3.4	0	1	0
1460	0	3	36.3	82	121	89	99.6667	20	99	1	22	3.4	3.76	58	12.1	16.6	4.1	0.6	1	1	0
1461	0	7	35.3	71	136	69	91.3333	20	99	1	4	10.2	5.11	202	14	8	3.8	2.4	3	1	0
1462	0	5	37	61	90	63	72	21	100	2	3	6.9	3.13	173	9.5	12.5	4.4	1.1	1	4	0
1463	0	1	36.5	67	118	67	84	20	98	3	17	9.3	4.09	253	12.9	13.3	3.8	0.7	2	2	0
1464	0	2	36.9	78	123	70	87.6667	10	69	1	0	14.8	4.21	245	13.2	12.7	3.9	0.7	4	2	0
1465	0	6	37.1	91	163	84	110.333	20	97	1	13	7.7	4.64	157	14.1	13.8	3.6	1.8	2	4	0
1466	0	0	36.7	102	82	91	88	20	94	3	6	12.7	4.25	36	13.1	14.6	4.4	11.3	2	4	0
1467	0	0	36.7	102	82	91	88	20	94	3	6	9.8	4.92	276	14.8	9	3.8	1.2	4	4	0
1468	0	3	36.1	103	105	51	69	29	97	3	4	8.1	3.03	204	8.3	16	4.1	1.1	2	4	1
1469	1	2	36.7	0	0	0	0	0	0	7	136	8.5	2.9	133	7.8	18.1	2.9	1	1	1	1
1470	0	5	37.5	80	100	60	73.3333	25	97	3	1	19.1	4.59	220	13.4	3	4.5	1.4	5	5	0
1471	1	5	37.1	78	156	85	108.667	25	98	2	42	8.7	4.51	154	14.1	14.8	3.6	0.6	2	5	0
1472	0	1	36.5	88	123	86	98.3333	16	98	1	6	14.9	2.71	148	7.6	15	4	1.3	0	1	0
1473	0	4	36.2	99	193	162	172.333	20	98	2	4	20.9	5.24	208	15.5	13.4	2.8	1.3	2	1	0
1474	0	4	36.5	79	145	78	100.333	18	100	1	5	7.3	3.76	117	11.5	14.1	4	0.8	2	2	0
1475	0	1	37.3	90	124	84	97.3333	12	100	2	2	17.9	2.74	171	10	14	3.3	0.7	2	5	0
1476	0	2	36.5	125	96	52	66.6667	30	100	6	19	6	4.68	123	12.6	14.3	4	0.9	2	1	1
1477	0	4	37.3	65	129	87	101	20	100	1	1	13.7	2.54	108	7.8	14.4	4.6	0.7	0	1	0
1478	0	3	36.5	93	115	76	89	15	98	1	17	0.5	2.62	11	8.3	14.5	4.3	0.9	2	0	0
1479	0	5	36.8	101	121	78	92.3333	15	100	2	4	10.2	4.57	262	13.2	3	4.2	1.1	2	4	0
1480	0	5	36.9	58	160	90	113.333	21	100	2	11	19.4	5.48	321	15.6	6	4.5	2.2	2	0	0
1481	0	1	38.1	100	134	73	93.3333	15	100	1	11	7.8	2.82	274	7.3	15.3	3.3	2.1	4	3	0
1482	0	4	36.8	80	125	78	93.6667	16	96	2	7	7.5	4.04	195	12.4	11.7	3.7	0.6	0	2	0
1483	1	3	36.1	89	97	61	73	20	99	2	5	17.3	4.04	104	11.9	14.2	4.5	1.2	0	5	0
1484	0	5	36.6	73	183	83	116.333	20	100	1	1	17.3	4.7	517	13.6	14.6	4.8	1.6	2	4	0
1485	0	1	36.8	86	117	81	93	20	100	1	0	22.7	4.92	264	15.3	12.3	5	1.1	0	4	0
1486	0	4	36.5	76	170	100	123.333	20	99	1	3	18.1	3.74	386	11.8	14	4.9	1	0	5	0
1487	0	3	36	57	141	94	109.667	16	100	1	2	10.8	5.3	217	14.2	16.7	4.1	0.8	2	4	0
1488	0	4	37	106	112	81	91.3333	18	99	2	2	7.2	4.39	146	12.8	14	4.3	0.9	1	0	0
1489	0	2	36.5	105	118	78	91.3333	20	98	4	11	20.1	3.88	343	11.9	12.5	3.9	0.5	2	1	0
1490	1	1	36.7	53	118	84	95.3333	20	99	1	10	14.4	5.08	304	13.7	13.8	4.2	1.1	2	0	0
1491	0	3	37.4	92	168	96	120	18	96	1	2	6.6	3.24	97	9.9	5	3.8	0.6	1	2	0
1492	1	3	35.2	100	90	60	70	20	95	6	0	10.7	3.15	189	10.7	14.2	3.7	1	2	2	0
1493	1	3	35.2	100	90	60	70	20	95	3	6	5.6	3.68	231	12	12.1	4.1	0.9	0	5	0
1494	0	3	37	84	151	111	124.333	19	99	1	2	14.6	3.99	556	11.6	5	3.5	0.7	4	1	0
1495	0	3	38.3	129	112	83	92.6667	25	98	5	0	7.8	2.89	71	9.1	19.6	4.5	5.7	2	1	1
1496	0	3	38.3	129	112	83	92.6667	25	96	5	14	7	3.77	130	12.8	4	3.9	0.9	1	1	0
1497	0	4	36.8	70	118	78	91.3333	18	98	1	6	4.8	3.62	121	12.1	7	3.9	4.3	2	5	0
1498	0	4	36.8	67	158	97	117.333	18	94	1	5	14.7	5.2	180	15.1	6	3.9	1.4	5	2	0
1499	1	2	37.9	92	133	75	94.3333	20	98	1	3	14.7	4.77	341	13.3	13.4	4.2	2.7	1	1	0
1500	0	2	37	110	173	128	143	20	99	2	9	11.2	4.98	289	14.5	6	4.2	0.8	2	2	0
1501	0	4	37.5	134	118	70	86	15	94	4	7	14.8	4.62	265	14.3	12.2	3.5	0.9	2	4	0
1502	0	6	37.6	81	133	74	93.6667	19	96	1	5	5.4	3.84	154	12.3	12.7	4.3	0.8	2	4	0
1503	0	1	37.8	91	124	72	89.3333	18	100	1	17	11.1	4.22	203	12.4	13.2	4	1	1	4	0
1504	0	5	36	46	80	48	58.6667	21	100	5	318	9.2	4.11	174	10.8	14.6	3.4	0.7	2	4	0
1505	0	4	36.8	98	154	101	118.667	15	100	2	13	13.9	4.37	227	10.1	15.3	3.8	1	2	2	0
1506	0	3	37.1	96	137	65	89	23	88	4	116	8.7	4.26	272	12.1	17	3.7	0.6	1	4	1
1507	0	3	36.9	90	144	101	115.333	20	100	1	4	17.4	4.48	236	13.4	14.5	4	1.2	2	1	0
1508	0	6	36.8	76	151	78	102.333	14	98	0	19	7.3	3.84	272	12.1	12.1	4.2	0.8	2	2	1
1509	0	1	36.9	85	136	71	92.6667	19	97	1	10	34.7	3.4	389	10.3	13.7	3.6	0.8	0	5	0
1510	0	6	36.6	81	145	75	98.3333	20	98	1	2	15.9	3.44	185	11.5	12.8	3	1.1	2	2	0
1511	0	7	37.6	104	134	74	94	23	93	3	2	9.7	2.93	263	8.9	5	4.4	1.5	4	1	0
1512	0	3	36.9	84	131	78	95.6667	18	100	1	1	2.7	4.3	59	14.2	12.6	3	1.1	2	5	0
1513	0	4	36.9	80	137	93	107.667	20	100	1	15	20.3	4.95	332	13.8	4	3.9	0.7	4	2	0
1514	1	6	36.8	75	172	93	119.333	20	98	1	20	8.4	4.13	217	13.1	11.5	3.5	0.8	1	1	0
1515	0	3	37.5	92	155	89	111	20	95	1	25	5.3	4.47	201	13.2	16.9	4.2	0.5	1	5	0
1516	1	2	38	98	112	62	78.6667	20	98	1	15	15.1	4.19	214	13.1	13.8	4.3	1.1	2	1	0
1517	0	4	38.1	81	151	76	101	14	91	1	1	6.5	3.42	159	11.4	13.6	4	1.1	0	5	0
1518	0	1	37	85	131	90	103.667	17	99	1	4	14.1	3.89	285	11.1	13.6	4.4	1	1	4	0
1519	0	5	37.3	55	139	67	91	18	96	2	45	6.8	3.69	123	12.9	12.6	5	0.7	0	5	0
1520	0	4	37.8	86	124	91	102	20	95	1	15	15.4	4.55	428	14.5	12.9	4.4	1.2	2	1	0
1521	0	6	36.6	93	155	89	111	19	100	1	6	11.8	4.93	304	16.1	6	4.9	0.8	5	1	0
1522	1	6	35.6	0	0	0	0	0	0	10	1	15.7	3.19	233	9.2	16.7	4.5	4	2	0	1
1523	0	5	37.6	90	118	65	82.6667	20	99	1	1	11.5	4.27	163	13.8	12.9	3.9	0.9	2	1	0
1524	1	6	36.5	78	161	67	98.3333	20	98	3	3	13	3.92	258	12.6	6	4.4	0.6	6	5	0
1525	0	4	37.3	91	127	79	95	15	97	1	19	19.8	4.59	253	13.3	14	3.8	0.9	0	5	0
1526	1	4	36.3	88	133	105	114.333	20	100	1	6	9.5	4.42	353	13	13.6	3.6	0.8	5	0	0
1527	0	4	34.9	120	76	44	54.6667	20	100	7	4	4	2.65	115	9.1	6	3.1	0.3	2	5	0
1528	1	6	37.1	74	132	90	104	15	100	1	2	13.8	4.22	155	13.2	15.1	4.5	2.1	1	1	0
1529	0	6	36	96	125	92	103	31	92	3	5	8.7	4.61	267	12.1	5	4	1.5	4	1	0
1530	0	4	37.5	118	136	96	109.333	28	100	4	16	5.7	4.68	217	14.3	12.4	4	1.2	1	1	0
1531	1	1	36.8	58	138	108	118	11	98	1	8	8	4.86	148	12	16.9	4.1	1.2	2	5	0
1532	0	1	37.2	80	154	91	112	20	98	1	15	8.1	4.47	309	12.6	13.3	4.2	0.6	1	4	0
1533	1	2	36	87	127	72	90.3333	20	93	2	37	9.2	4.61	222	14.4	12.5	4.1	0.9	1	4	0
1534	0	2	36.9	102	162	114	130	20	100	2	1	13.5	5.12	223	14	12.8	4.6	1	1	5	0
1535	0	4	36.6	69	132	91	104.667	18	99	1	2					6			3	3	0
1536	1	4	36.9	75	126	79	94.6667	13	100	0	2	6.4	3.35	55	10.4	18.4	5.4	1.1	0	2	0
1537	1	1	37.9	146	134	66	88.6667	22	98	5	45	8.2	2.83	217	8.5	12.3	3.9	1.7	1	4	0
1538	1	6	36.6	75	150	80	103.333	19	100	1	5	11.2	4.46	246	13.8	5	3.7	0.8	2	4	0
1539	0	2	37.6	88	161	111	127.667	22	100	2	20	34.8	4.73	255	13.5	14.2	4.5	1.6	2	4	0
1540	0	3	37.2	94	130	69	89.3333	15	100	1	19	4.6	2.59	352	8.2	7	5	2.7	2	1	0
1541	1	5	36.2	82	115	69	84.3333	20	92	1	8	18.3	3.66	181	10.5	6	4.2	1.1	2	0	0
1542	0	3	37.5	78	149	96	113.667	18	98	1	4	12.3	2.85	76	9.5	13.9	4.4	1.1	0	1	0
1543	0	7	37.5	89	165	89	114.333	25	70	2	25	13.4	4.89	171	14	13.9	4.7	1.1	1	0	0
1544	0	4	36.2	51	113	78	89.6667	20	98	1	16	7.7	3.04	318	8.7	15	4.4	1.4	1	4	0
1545	0	2	37	84	127	92	103.667	20	100	1	2	14.5	4.2	157	13.7	8	3.8	1.8	1	2	0
1546	0	4	36.8	65	107	68	81	16	91	1	16	10.1	4.77	247	13.7	13.9	4.4	0.9	2	2	0
1547	1	4	36	80	138	87	104	18	99	1	9	8.7	4.64	269	12.1	14.5	3.6	0.8	0	4	0
1548	0	5	36.3	84	109	72	84.3333	16	93	1	30	13.9	4.36	158	12.8	4	4	0.6	2	4	0
1549	0	2	36.8	80	123	72	89	19	91	3	9	12.8	3.44	250	9.7	17.3	2.8	0.6	1	5	0
1550	0	3	36.5	81	158	110	126	20	98	1	3	15.7	4.12	259	13	8	4	0.6	2	1	0
1551	1	5	37.2	82	167	76	106.333	20	96	3	4	8	4.72	167	14.4	12.4	3.8	0.9	3	2	0
1552	0	2	37.4	92	146	90	108.667	18	99	1	15	8	4.35	201	13.2	14.2	3.6	0.6	1	4	0
1553	1	6	37.9	108	142	65	90.6667	22	100	3	3	29.9	6.16	415	17.2	13.9	3	1	2	4	0
1554	1	4	37.3	72	95	54	67.6667	20	100	2	15	6.8	2.98	127	9.5	6	4	1.4	1	4	0
1555	0	5	37.2	87	168	77	107.333	20	92	1	12	9.5	3.06	183	10.3	13	4	1.4	1	5	0
1556	0	5	35.4	49	132	112	118.667	25	96	3	52	19.3	3.3	107	9.3	14.6	4.9	1.4	2	4	0
1557	1	7	37.8	115	153	83	106.333	28	90	5	30	19	3.22	190	9.3	16.2	6.2	5.5	2	0	1
1558	0	4	36.6	76	126	83	97.3333	18	96	1	4	14.4	4.73	219	13.7	14.6	4	0.9	5	1	0
1559	0	2	36.5	86	136	88	104	19	97	1	10	10.8	4.61	343	14.5	11.8	3.8	0.7	2	4	0
1560	0	6	36.5	141	132	73	92.6667	20	98	6	16	7.2	3.41	237	10.7	14	3.3	0.8	2	5	0
1561	0	4	37	111	156	91	112.667	20	91	5	5	16.9	3.81	360	11.4	12.8	4.6	1.2	2	4	0
1562	1	6	37.3	87	130	73	92	20	98	1	13	11	3.29	198	9.9	8	4	4.2	0	5	0
1563	0	2	37.9	79	119	81	93.6667	20	96	3	4	9.1	4.47	230	13.7	12.9	4	0.7	2	4	1
1564	0	8	36.5	73	181	99	126.333	18	93	1	6	16	3.97	81	11	13.9	4	1.2	2	4	0
1565	0	2	37.4	81	136	98	110.667	26	94	3	21	13.5	2.64	101	8.5	14.2	5	1	0	5	0
1566	0	1	39.3	150	115	79	91	21	100	7	6	9.3	4.63	261	14.3	13.9	3.8	1.3	3	2	0
1567	0	1	37.3	91	121	64	83	20	100	1	17	9.6	3.92	243	12.1	6	3.8	0.8	2	4	0
1568	0	2	36.4	122	164	94	117.333	20	99	3	4	10.5	3.92	226	11.9	13.5	4.2	0.8	1	2	0
1569	0	6	37	93	189	129	149	16	85	4	48	8.9	4.37	256	13.2	13.7	3.8	1	1	2	1
1570	0	4	37.1	90	173	90	117.667	20	97	1	3	13.1	3.32	13	10.7	8	4.1	4.1	2	4	0
1571	0	6	36	92	145	98	113.667	20	95	1	44	5.7	3.92	114	12.4	12.5	4.5	0.5	2	1	0
1572	0	7	36.6	106	103	61	75	18	98	2	68	11.5	4.32	263	12.8	13.1	4.5	1	2	4	0
1573	0	4	36.6	72	154	96	115.333	27	99	2	4	12.5	3.79	253	10.6	14	3.8	1	1	5	0
1574	0	3	36.5	67	138	87	104	18	95	1	6	18.8	2.98	262	8.6	15	2.4	0.9	2	4	0
1575	0	6	37.9	72	148	85	106	25	100	2	46	12.1	5.15	311	13.5	13.6	5	1.2	3	4	0
1576	1	6	36.8	102	95	61	72.3333	18	98	3	20	17.2	4.76	247	15.3	13.8	4.4	1.2	2	1	0
1577	0	3	36.9	97	135	91	105.667	20	86	1	34	7.3	3.87	234	10.5	14	3.9	0.7	2	4	0
1578	1	3	37.6	87	129	85	99.6667	20	100	1	4	13.3	4.32	374	12.9	9	4.2	0.7	2	4	0
1579	0	6	37.1	88	139	86	103.667	18	96	1	2	20.4	3.38	277	10.1	14	4	1.2	2	4	0
1580	1	5	37	94	136	92	106.667	18	100	1	7	8.9	1.73	352	4.6	16.5	4.9	1.5	1	4	0
1581	1	3	37	75	126	86	99.3333	19	100	1	17	7.6	5.29	137	13.6	15.3	4.4	1	3	0	0
1582	1	3	36.5	100	126	86	99.3333	17	100	1	5	6.4	2.57	51	8	11	4.4	6.5	1	0	0
1583	0	5	35.3	98	162	90	114	20	100	1	10	11.2	3.4	141	11.2	13.2	4.1	0.7	2	5	1
1584	0	3	36.9	126	79	61	67	26	98	6	38	7	4.57	186	14.7	15.6	4	1.1	1	4	1
1585	0	6	36.5	61	119	68	85	19	98	1	6	14.4	3.19	249	8.2	15.6	4.2	0.9	1	4	0
1586	0	4	38	75	134	93	106.667	24	93	3	43	13	2.91	202	7.8	14.9	4.2	1	2	5	0
1587	1	5	36	78	187	98	127.667	20	94	1	6	9.4	4.02	102	12.4	13.3	4.5	1.1	1	1	0
1588	1	5	37	91	114	86	95.3333	18	84	1	7	4.8	3.05	132	7.8	14.8	4.3	1.7	0	1	0
1589	1	0	36.8	72	155	127	136.333	20	100	3	1	9.8	3.55	557	10.5	14.2	4.2	2.7	1	4	0
1590	1	2	37.9	107	107	53	71	19	100	2	19	34.3	5.33	528	12.4	18.6	4	1	2	2	0
1591	0	2	36.5	104	115	79	91	20	97	2	9	8.5	2.79	161	8	15.3	4.4	1.8	2	1	0
1592	1	5	36.5	103	132	68	89.3333	20	96	2	7	9.6	3.95	185	12.8	14.2	4.1	1	4	3	0
1593	1	4	36	71	168	87	114	20	99	1	26	9.5	4.28	129	12.6	7	3.5	0.8	0	5	0
1594	0	6	36.5	61	131	65	87	22	100	4	2	24.9	2.96	187	9.1	13.2	4	0.7	1	1	0
1595	1	5	36.5	84	137	72	93.6667	18	98	1	5	21	4.08	248	12.4	14.2	3.3	1.3	1	1	0
1596	0	1	36.8	99	93	61	71.6667	20	100	2	0	9.5	4.18	205	12.4	8	4	1.9	2	0	0
1597	0	7	36.6	87	155	60	91.6667	24	98	2	13	6.2	3.01	376	10.3	14	5.1	0.8	2	4	0
1598	0	3	36.8	102	134	82	99.3333	21	96	3	4					8	4.1	0.7	2	5	0
1599	0	6	37	85	153	67	95.6667	24	95	3	31	6.8	3.69	156	10.8	5	3.3	0.5	2	4	0
1600	0	6	36.5	57	169	87	114.333	15	96	1	6	10	4.83	282	14.2	13	3.6	0.7	2	4	0
1601	0	5	37.1	105	122	82	95.3333	20	95	2	4	10.2	3.8	156	12.4	13.6	3.7	1.2	0	5	0
1602	0	4	37.1	82	128	93	104.667	19	95	1	40	11.4	3.04	251	9	13.5	3.4	0.7	0	1	0
1603	1	3	36.5	91	129	91	103.667	20	90	1	15	14.8	4.92	225	13.7	9	4	0.5	5	0	0
1604	0	5	36.2	85	157	87	110.333	21	98	2	20	13.8	2.9	192	8.5	13.7	4.5	1.7	2	4	0
1605	1	7	36.4	114	102	72	82	16	95	3	46	7.8	4	199	10.9	15.3	4.4	0.7	2	4	0
1606	0	5	36.5	84	102	67	78.6667	15	96	1	2	13.8	3.14	313	7.9	8	3.9	1.4	0	1	0
1607	1	5	37.2	77	67	51	56.3333	19	95	4	1	9.8	3.64	145	11.3	13.8	4.3	1.4	2	5	0
1608	1	5	38.2	78	186	93	124	20	99	1	118	8.7	3.35	107	9.4	17.2	4.4	0.8	0	5	0
1609	0	5	36.7	86	210	96	134	16	98	3	14	10.8	4.18	173	12.4	12.4	3.9	0.8	2	4	0
1610	0	2	36.9	122	158	111	126.667	26	97	4	5	7.2	2.55	29	8.6	12.9	4.4	0.9	1	0	0
1611	1	4	36.5	68	126	75	92	18	98	2	45	6.4	5.43	260	15.1	13.5	3.9	1.1	3	3	0
1612	1	4	37	85	126	79	94.6667	20	95	1	80	7	2.77	349	8.7	15.2	5	4.7	1	4	0
1613	0	4	36.7	114	152	98	116	23	97	6	5	10.3	4.17	240	9.9	9	3.7	0.6	2	2	0
1614	1	6	36.4	88	185	94	124.333	18	96	1	6	10.2	5.29	297	15.1	13.8	3.8	1.1	2	2	0
1615	1	4	36.3	77	132	67	88.6667	16	97	3	6	9.9	3.64	200	11.4	13.9	3.1	0.9	2	0	0
1616	0	3	36.7	86	138	72	94	21	98	2	4	15.4	2.68	111	8.3	13.7	4.8	0.5	1	1	0
1617	0	5	36.4	94	118	79	92	14	99	2	3	7.9	3.6	149	10	14.8	4.1	1.6	1	4	0
1618	0	2	37.1	100	143	107	119	20	95	1	6	11.1	2.17	244	5.3	15.4	4.2	1.1	2	0	0
1619	0	5	36.6	67	128	73	91.3333	20	100	3	15	10.6	3.8	210	12.4	12.7	2.9	0.8	2	0	0
1620	0	2	36.5	77	103	92	95.6667	20	96	1	4	6.6	4.13	269	9.8	14.6	3.5	0.9	3	3	0
1621	0	4	36.5	78	154	64	94	20	99	2	184	12.9	4.1	192	10.9	9	4.8	0.8	2	4	0
1622	1	5	37.3	89	193	91	125	23	96	2	23	17.6	4.12	443	13.1	6	4	2.9	0	2	0
1623	0	3	37.2	93	179	86	117	20	99	1	4	6.3	5.61	189	13.4	18.7	3.8	0.8	4	3	0
1624	0	4	37.3	63	116	69	84.6667	18	100	1	2	12.4	3.77	265	9.8	15	3	0.7	1	0	0
1625	0	2	36.8	113	153	102	119	21	89	4	27	9.5	5.65	265	17.3	6	4.3	1.5	2	4	0
1626	1	5	36.5	89	154	87	109.333	20	97	1	0	12.3	2.72	268	8.8	13.6	4	0.8	0	2	0
1627	0	7	37	81	177	69	105	20	98	1	8	37.3	3.44	19	8.8	16.2	4	1.4	0	5	0
1628	0	4	36.8	62	167	72	103.667	20	100	1	5	8.9	3.02	97	8.8	15.2	3.6	0.9	2	2	0
1629	0	6	37	65	171	90	117	16	99	3	3	9.6	4.37	321	13.7	6	4.4	1.3	2	1	0
1630	0	5	36.3	80	183	90	121	23	91	5	1	10.1	4.35	211	13.3	12.7	3.9	0.9	1	1	0
1631	0	2	37.8	92	155	74	101	16	98	2	17	14.2	5.4	507	15.1	6	3.7	1.4	1	1	0
1632	0	2	37.4	148	135	80	98.3333	28	97	6	11	19.2	3.61	191	11.3	14.6	4.6	6.4	2	1	1
1633	0	4	37.7	71	140	80	100	15	100	1	7	12.7	2.48	63	7	14.2	4.2	9.6	1	4	0
1634	0	5	36.5	70	131	85	100.333	20	98	1	16	4.5	5.14	199	13.7	15.5	4	1.7	1	2	0
1635	1	6	37.5	91	173	78	109.667	29	97	4	14	5.3	3.57	341	7.1	9	4.7	0.8	2	1	0
1636	1	5	36	89	170	66	100.667	18	98	1	23	18.7	2.78	282	8.7	14.3	5	0.7	2	0	0
1637	0	2	36.5	78	157	102	120.333	15	100	2	4	16.2	3.94	167	12.7	14.6	3.9	1.2	3	3	0
1638	0	4	34.3	0	0	0	0	0	0	10	7	12.7	5.51	338	16.3	13.8	4.5	5.9	3	5	1
1639	0	3	36.5	100	140	42	74.6667	15	100	2	4	10.2	2.85	179	7.9	15.9	2.5	0.7	0	1	0
1640	1	5	36.5	71	149	80	103	19	99	1	4	13	4.01	212	12.3	12.3	4.5	1.2	5	5	0
1641	1	3	36.5	82	120	80	93.3333	20	100	1	14	15.1	2.66	144	8.4	8	4.3	0.4	1	5	0
1642	0	5	37	85	129	79	95.6667	20	96	1	12	22.5	4.92	179	12.3	14.1	2.8	0.9	2	0	0
1643	0	5	37.2	89	134	64	87.3333	20	97	1	3	18.5	5.04	250	14.6	13	4	0.5	2	4	0
1644	1	6	35.8	85	167	83	111	20	95	1	25	6.6	3.31	220	10.4	13.5	4	1	1	4	0
1645	0	5	37.3	87	136	69	91.3333	17	100	1	24	12.3	4.34	225	14	13.3	4.2	0.8	2	4	0
1646	0	3	36.8	118	128	79	95.3333	18	87	6	2	11.6	4.1	250	13.4	14.9	4	0.9	2	2	0
1647	1	4	36.5	94	128	61	83.3333	16	95	1	7	12.3	2.83	100	8.9	8	4	3.7	2	1	0
1648	0	2	36.8	114	121	63	82.3333	20	99	3	4	6.3	4.09	127	11.8	13.8	4.2	1.3	1	4	0
1649	0	6	37.2	100	148	89	108.667	20	93	1	59	13.6	4	387	10.6	9	3	1.2	2	0	0
1650	0	4	37.7	113	196	100	132	28	97	4	4	8.2	4.43	214	13.8	13.3	4.2	0.6	1	2	0
1651	0	3	36.8	56	128	89	102	14	98	0	4	15.1	5.1	233	15.2	4	4	1.1	4	1	0
1652	0	1	36.6	91	163	88	113	18	98	1	16	9.7	4.57	333	11.8	14.8	4.2	3.1	1	0	0
1653	0	6	36	103	226	121	156	20	99	6	9	21.6	5.22	330	14.6	14.5	2.9	0.6	1	4	1
1654	0	1	36.9	150	97	57	70.3333	21	97	6	3	12.7	4.35	280	13.6	12.3	3.4	0.9	2	4	0
1655	0	1	37.4	104	137	82	100.333	30	95	4	15	19.7	3.09	157	8.5	15.6	4.4	1.7	0	0	0
1656	0	4	33.3	115	79	63	58	27	99	9	7	11.7	6.51	329	15.3	14.8	4.55	4.9	2	0	1
1657	0	6	37	93	189	129	149	16	85	4	48	8.9	4.37	256	13.2	13.7	3.8	1	1	1	1
1658	0	3	36.9	126	79	61	67	26	98	6	38	7	4.57	186	14.7	15.6	4	1.1	1	4	1
1659	0	4	34.3	0	0	0	0	0	0	10	7	12.7	5.51	338	16.3	13.8	4.5	4.9	2	0	1
1660	0	4	33.3	115	79	63	58	27	99	9	7	11.7	6.51	329	15.3	14.8	4.55	3.9	2	5	1
1661	0	1	37	109	113	69	89	30	74	12	16	14.6	4.33	183	13.8	19.6	3.6	6.8	1	0	1
1662	0	3	36	108	110	60	76.6667	29	71	6	2	9.5	4.06	229	13.7	12.4	4.2	1.1	2	4	1
1663	0	4	37.2	107	79	62	67.6667	17	91	7	21	12.5	4.53	117	14.3	17	3.9	0.7	1	5	1
1664	0	4	36.8	98	189	116	140.333	29	95	4	68	12.3	4.81	129	13.3	14.1	3.8	0.6	1	4	1
1665	0	6	37	81	182	75	110.667	20	99	1	6	4.2	4.48	182	12.1	16.3	2.8	0.6	1	5	1
1666	0	3	36	53	186	81	116	30	91	4	232	0.3	2.67	12	7.8	16.8	4.1	1.2	2	1	1
1667	0	4	37	81	182	75	110.667	20	96	9	3	9.1	4.47	225	13.3	17.9	4.3	5.8	2	1	1
1668	1	0	36	152	151	85	107	20	94	6	86	15.4	1.72	336	5.1	17.3	3.1	4	1	2	1
1669	0	4	37.3	78	226	126	159.333	16	86	5	3	7	3.39	242	9.2	14.4	5.8	5.5	2	1	1
1670	0	2	36.7	105	95	49	64.3333	43	77	8	11	9.4	4.49	265	11.2	15.8	4.6	5.8	2	0	1
1671	0	3	36	58	80	56	64	10	49	5	5	7.9	4.51	222	13.7	18.8	4.1	0.7	2	1	1
1672	0	6	36.4	70	38	28	31.3333	10	80	4	21	6.2	4	179	10.1	15.3	3.4	0.8	1	5	1
1673	0	1	36.3	150	133	79	97	35	85	7	1	35.9	2.58	6	7.8	16.7	3.6	0.7	1	4	1
1674	1	6	35.4	61	139	123	128.333	0	84	5	3	6.7	4.3	291	13.3	13	4.4	5.8	2	1	1
1675	1	4	35	81	89	69	75.6667	35	80	4	171	16.4	3.02	169	9	19.8	5.5	6.5	2	2	1
1676	1	5	36.8	103	95	67	76.3333	23	91	5	17	26.1	2.72	92	9.4	21.3	5.9	6	3	1	1
1677	0	3	36.5	71	213	122	152.333	20	97	3	28	19.5	4.4	235	14.2	13.9	5.6	6.4	2	1	1
1678	1	4	35.5	102	80	48	58.6667	29	94	7	29	13.9	4.18	356	12.9	17.6	3.8	0.9	1	2	1
1679	0	4	35	81	89	69	75.6667	35	80	12	44	12.9	6.82	82	15.9	16.7	5	5.8	2	4	1
1680	0	3	35	81	89	69	75.6667	35	80	10	25	7.4	4.29	143	13.7	19.5	3.8	0.9	1	4	1
1681	1	3	35.5	148	101	85	90.3333	25	95	6	4	10.2	4.15	561	12.5	14.2	4.2	0.6	2	1	1
1682	0	4	37.2	156	126	52	76.6667	49	95	6	3	13.6	5.23	299	15.2	16.2	3.7	1.2	1	5	1
1683	0	5	36.7	51	127	83	97.6667	12	94	2	25	5.6	2.81	15	7.7	18.4	3.9	1.9	1	1	1
1684	0	1	34.7	85	78	40	52.6667	33	99	8	11	7.3	3.98	141	12.2	17.9	3.9	0.7	1	5	1
1685	0	1	33.5	45	34	20	24.6667	15	20	9	22	11.1	4.19	236	11.8	18.6	5.8	5.3	2	1	1
1686	0	4	33.7	30	95	32	53	20	95	9	2	7.8	3.41	141	9.5	18.3	3.9	0.9	1	1	1
1687	0	7	35	101	212	105	140.667	19	97	4	69	7.9	3.82	109	12.4	18.3	4.4	5.3	2	2	1
1688	0	5	34.8	0	0	0	0	0	0	12	44	7.3	3.98	132	11.6	19.2	4.2	1.1	2	4	1
1689	0	5	33.2	101	212	105	140.667	19	97	12	21	11.8	2.34	153	5.9	16.7	4.4	5.9	2	1	1
1690	0	3	36.2	144	77	42	53.6667	30	89	10	19	22.4	5.23	239	15.5	16.1	5.5	6.3	3	2	1
1691	1	4	36.5	87	113	97	102.333	18	81	4	28	10.6	4.16	216	12.2	15.5	4.1	0.7	2	1	1
1692	1	4	33.7	120	71	59	63	22	62	11	35	15.5	3.32	225	10	18	4.4	5.6	2	1	1
1693	0	4	28	1216	129	186	116	20	71	12	14	15.2	4.08	181	11.6	15	2.9	2.4	1	1	1
1694	0	0	35.6	121	142	116	137	20	71	10	56	15	2.62	167	8.7	17.6	4.3	6	2	1	1
1695	0	4	35.2	123	148	123	126	20	71	7	56	6.3	4.4	238	11.5	15.7	4.1	1.1	2	4	1
1696	0	3	36	128	154	116	123	20	71	6	116	8.6	4.04	191	13.4	18.8	4.5	5.6	2	0	1
1697	0	5	38.4	121	142	117	122	20	71	3	14	6.4	3.4	215	11.1	14.4	3.9	0.4	1	1	1
1698	0	3	35	125	50	37	41.3333	13	92	8	36	10.1	3.81	212	10.2	16.4	4.8	6.4	2	4	1
1699	1	2	36.7	0	0	0	0	0	0	7	136	8.5	2.9	133	7.8	18.1	2.9	1	1	1	1
1700	0	3	37.1	96	137	65	89	23	88	4	116	8.7	4.26	272	12.1	17	3.7	0.6	1	5	1
1701	1	6	35.6	0	0	0	0	0	0	10	109	15.7	3.19	233	9.2	16.7	4.5	6.1	2	0	1
