# Supplementary material for: Modified Early Warning Score (MEWS) combined with biomarkers in predicting 7-day mortality in traumatic brain injury patients in the emergency department: a retrospective cohort study
Source: PeerJ journal article supplement (doi:10.7717/peerj.18936), 2025-02-13
Supplement: Codebook.xlsx [file Codebook.xlsx]

## Sheet: Sheet1
Variable		Codename
X1		number
X2		Age
X3		Genger
	0	male
	1	female
X4		history(year)
X7		BMI at admission
X8		Fasting blood glucose
X9		HbALc
X11		Education
	0	Junior middle education and below
	1	Senior middle school
	2	College degree and above
X12		Income
	0	≥3000
	1	<3000
X13		Marital status
	0	Married
	1	Notmarried
X14		place of residence
	0	Urban
	1	Rural
X15		Whether to live alone
	0	No
	1	Yes
X16		Whether to smoke
	0	No
	1	Yes
X17		Whether to drinke
	0	No
	1	Yes
X18		Family history of diabetes
	0	No
	1	Yes
X19		Symptoms
	0	Polydipsia
	1	Polyuria
	2	Polyphagia
	3	Hunger sensation
	4	Feebleness
	5	Weight loss
	6	Decreased vision
	7	Limb numbness
	8	Limb edema
	9	Limb ulcers
	10	Pruritus
	11	Other symptoms
X20		Comorbidities
	0	No
	1	Cardiovascular disease
	2	Cerebrovascular disease
	3	Peripheral neuropathy
	4	Respiratory disease
	5	Rheumatic immunologic disease
	6	Other
X21		Complication
	0	No
	1	Diabetic Nephropathy
	2	Diabetic Retinopathy
	3	Diabetic Foot
	4	Diabetic angiopathies
	5	Other
X22		Exercise frequency for each week
X23		Exercise time for each time
X24		SPBS physical burden
X25		SPBS emotion burden
X26		SPBS economic burden
X27		SPBS total score
X28		SDSCA diet
X29		SDSCA exercise
X30		SDSCA blood glucose monitoring
X31		SDSCA foot care
X32		SDSCA drug
X33		SDSCA total score
X34		PHQ-9
