# Supplementary material for: Modified Early Warning Score (MEWS) combined with biomarkers in predicting 7-day mortality in traumatic brain injury patients in the emergency department: a retrospective cohort study
Source: PeerJ journal article supplement (doi:10.7717/peerj.18936), 2025-02-13
Supplement: FigureS2.pdf [file FigureS2.pdf]

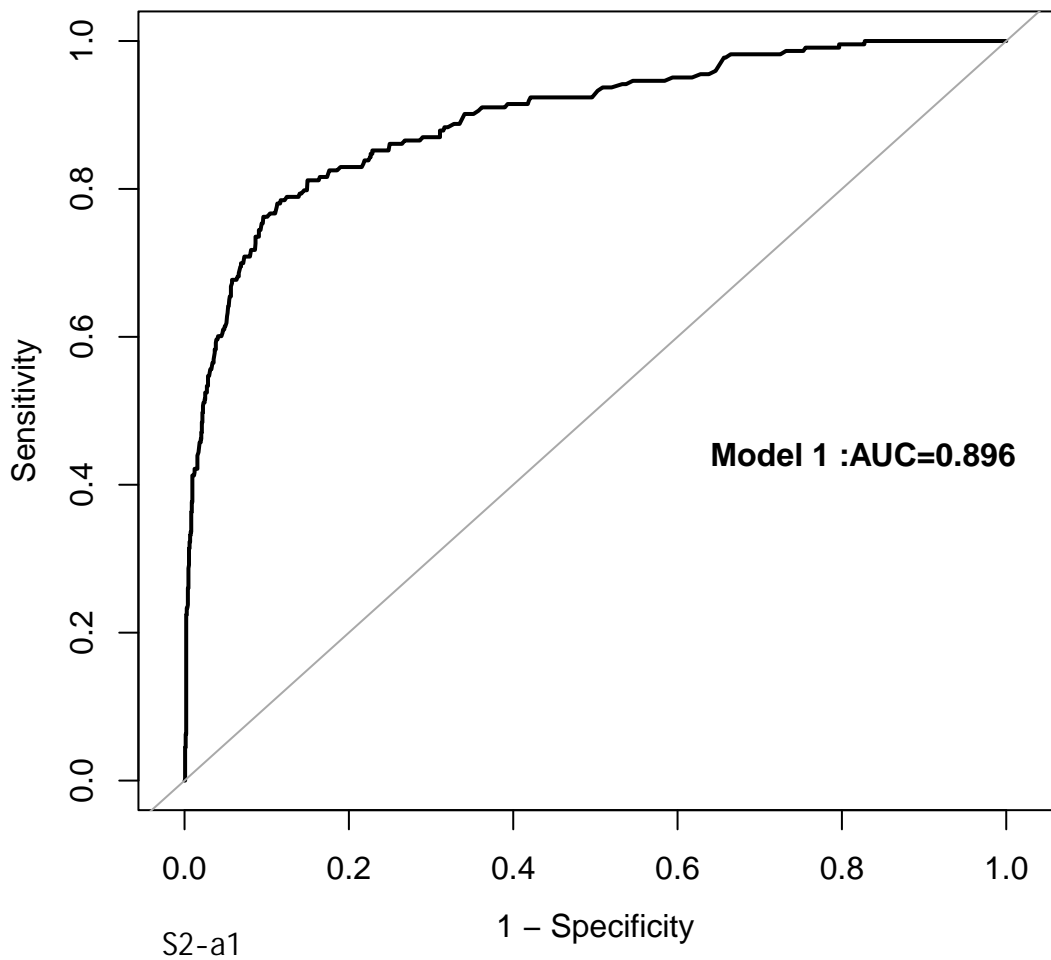

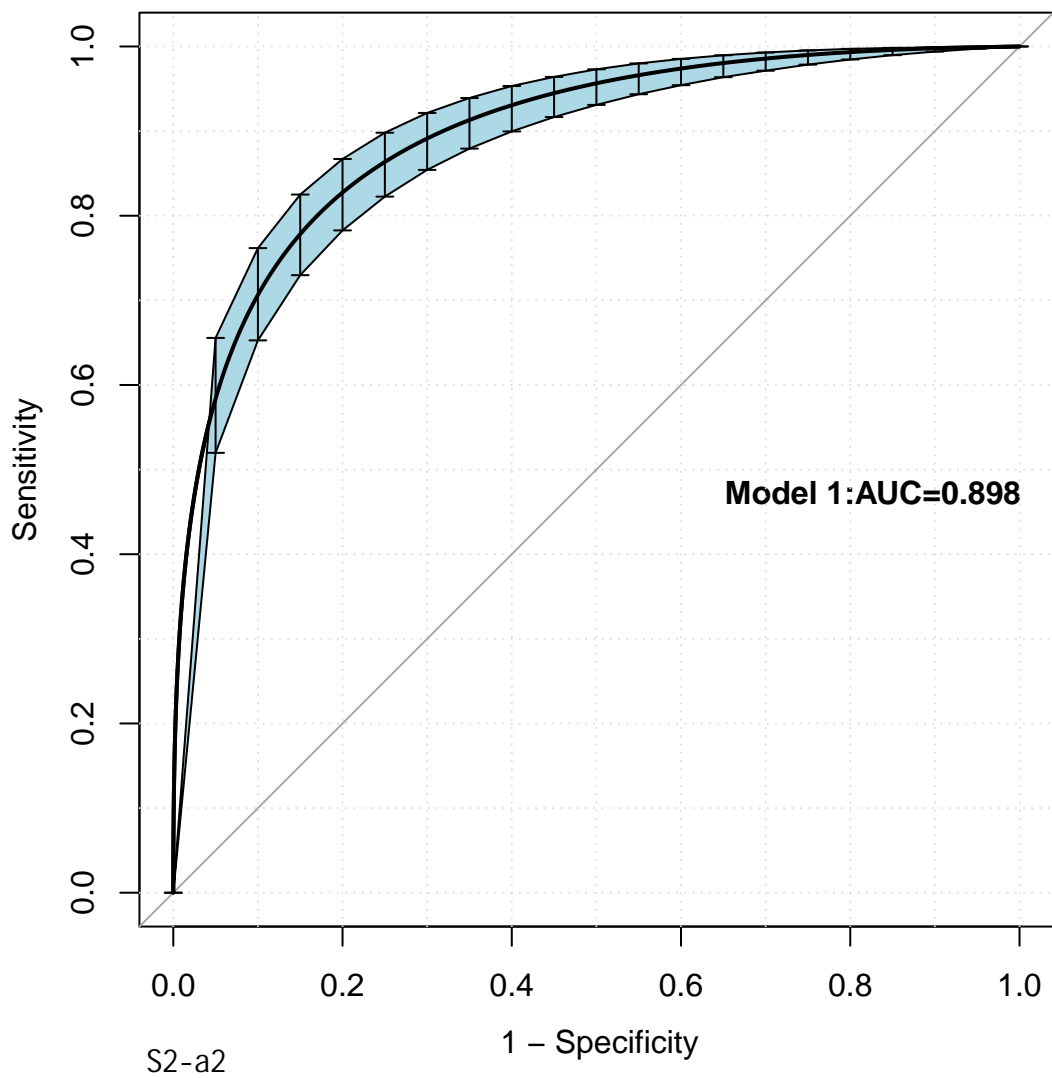

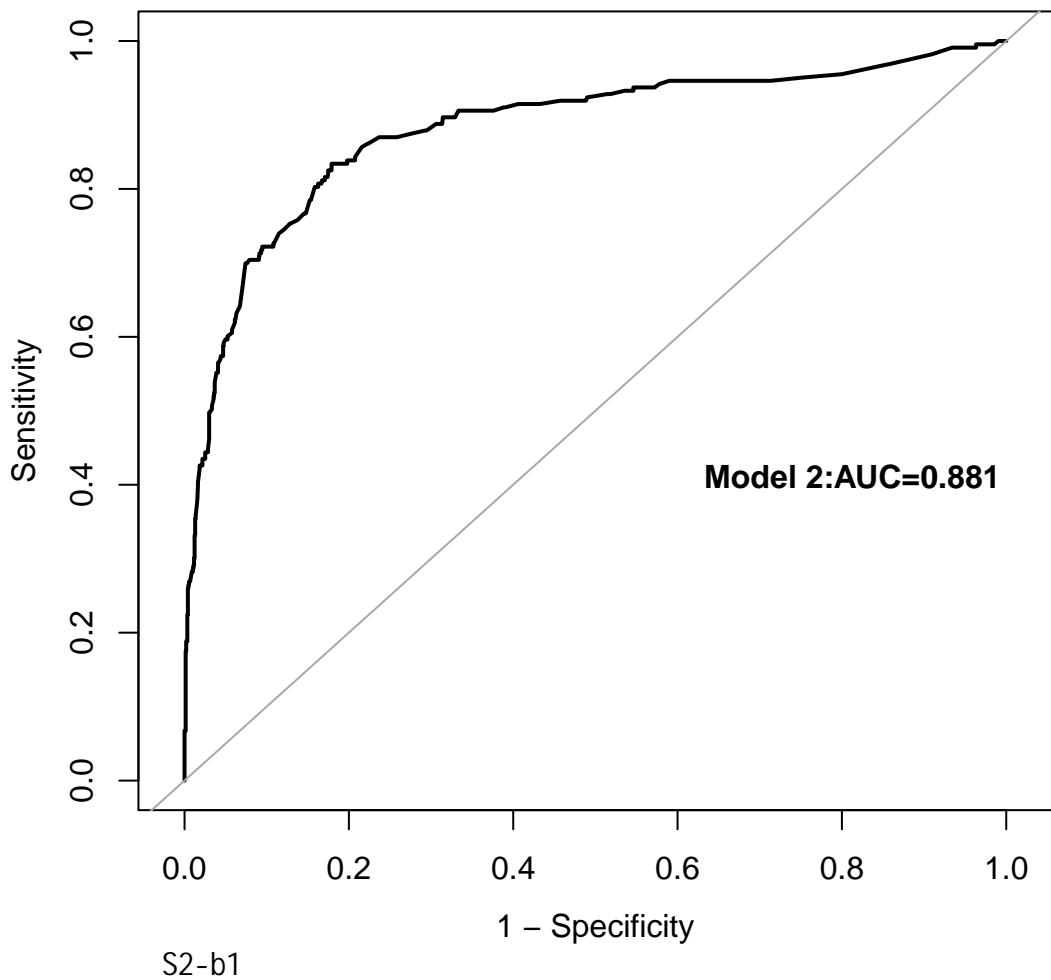

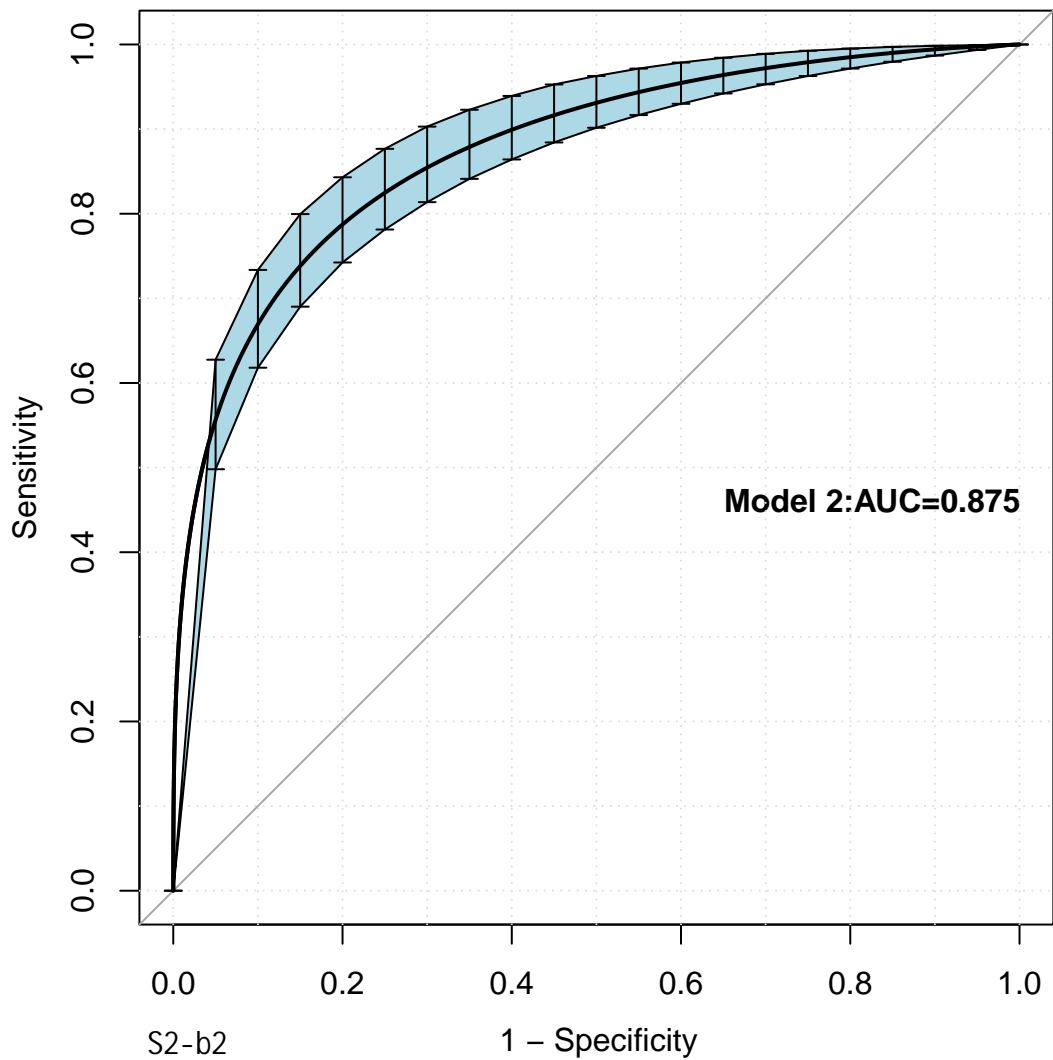

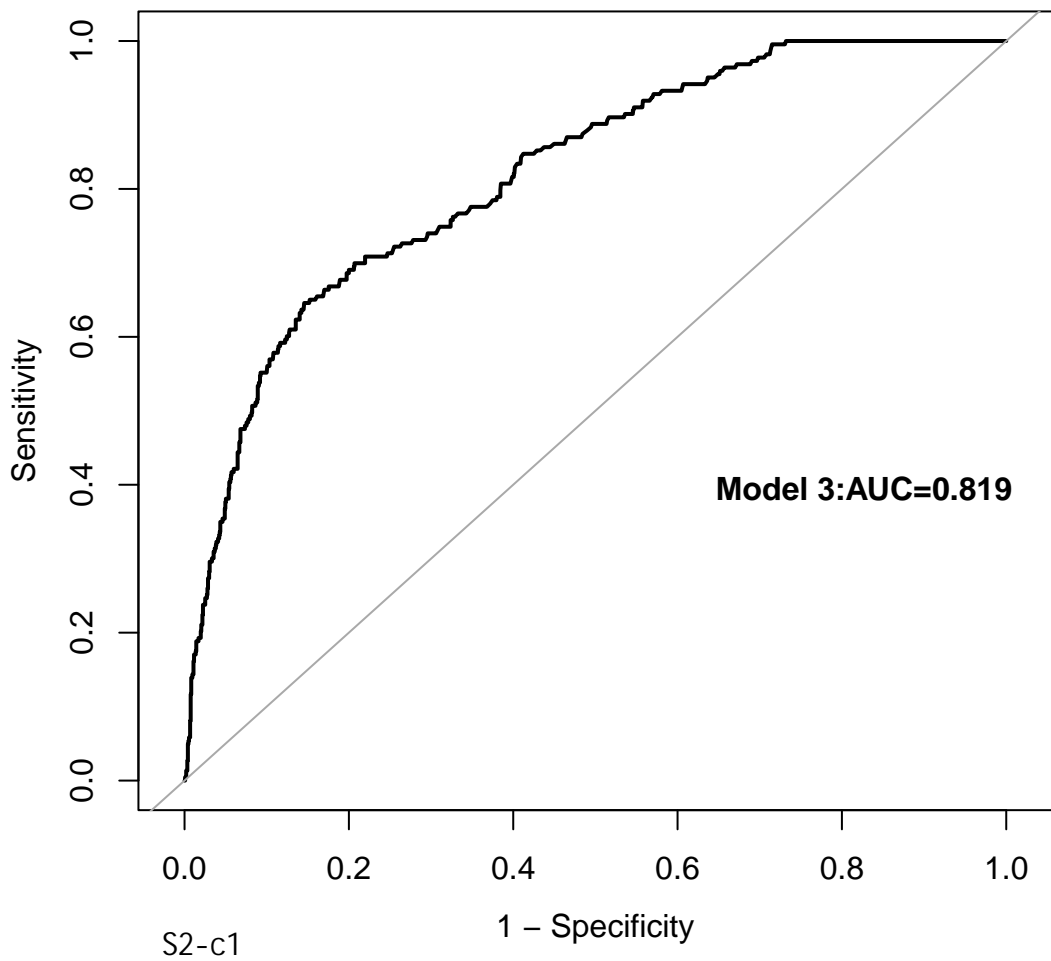

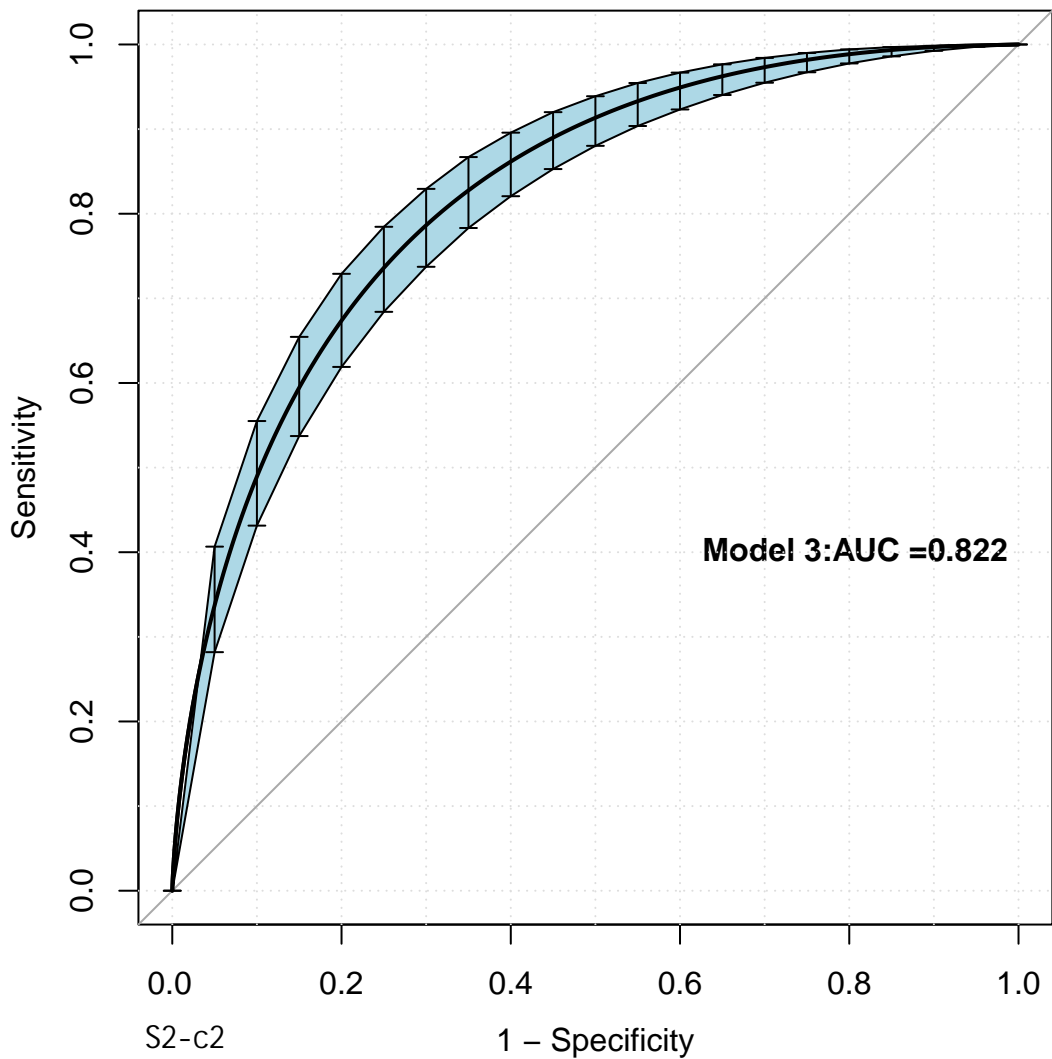

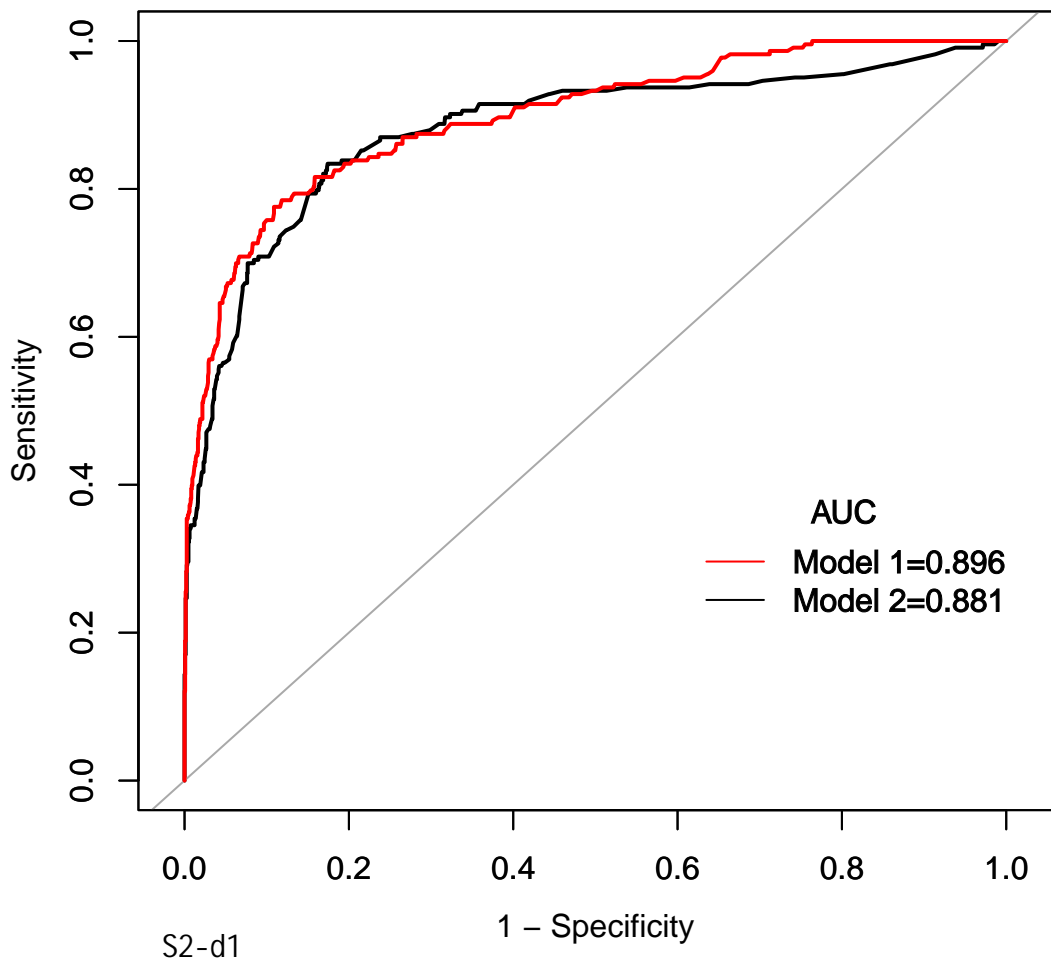

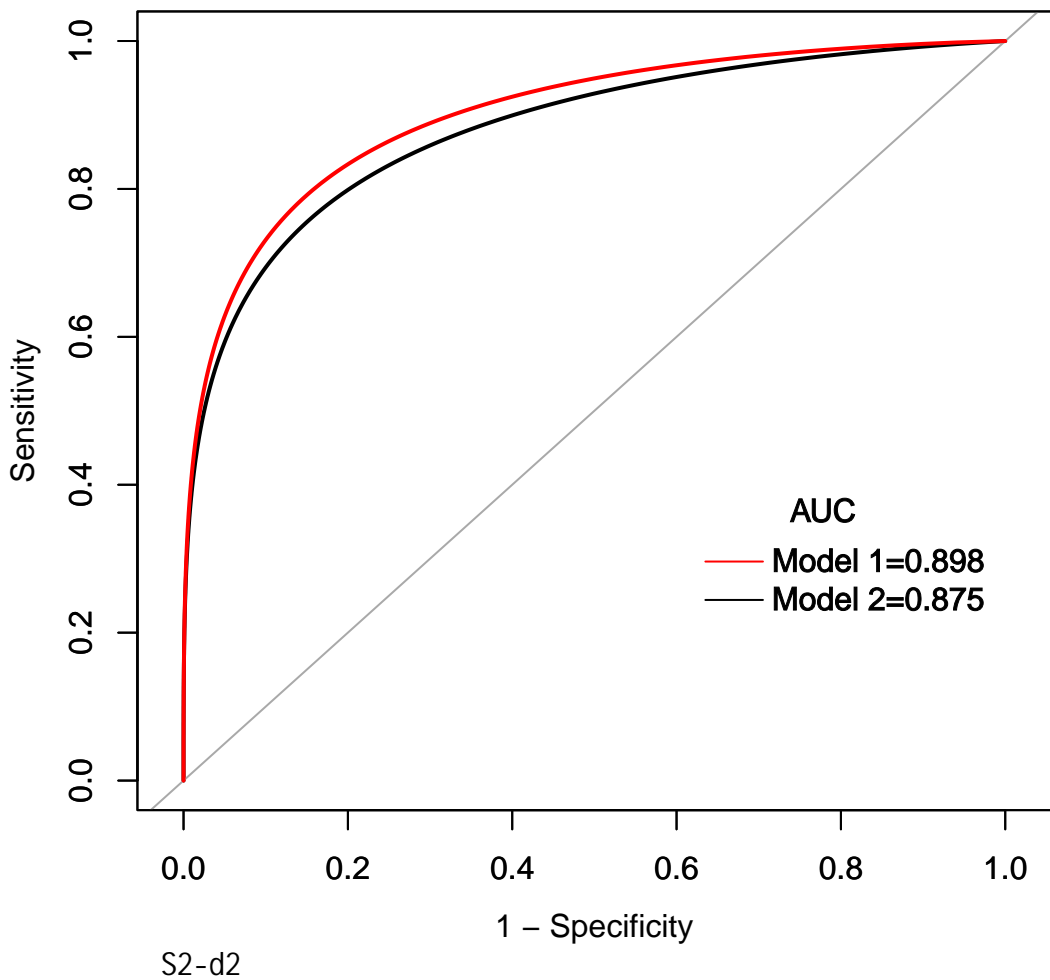



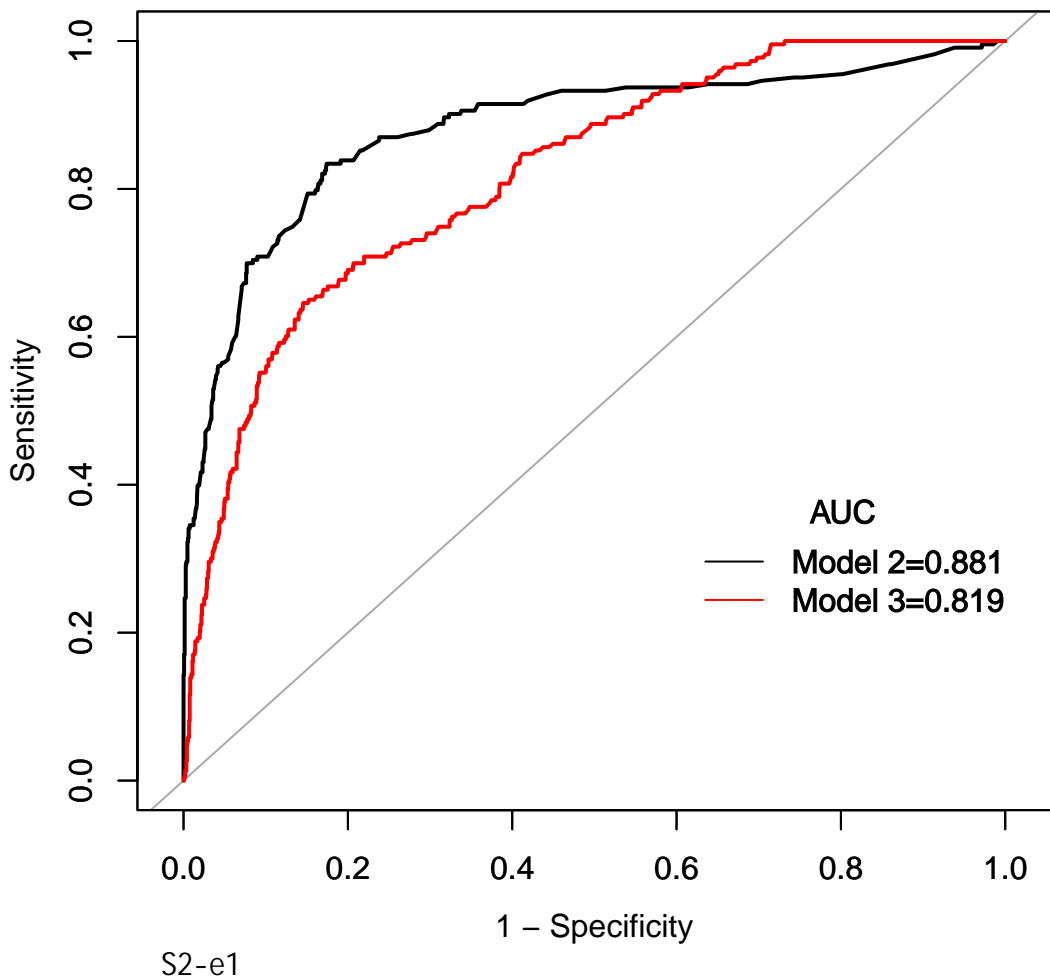

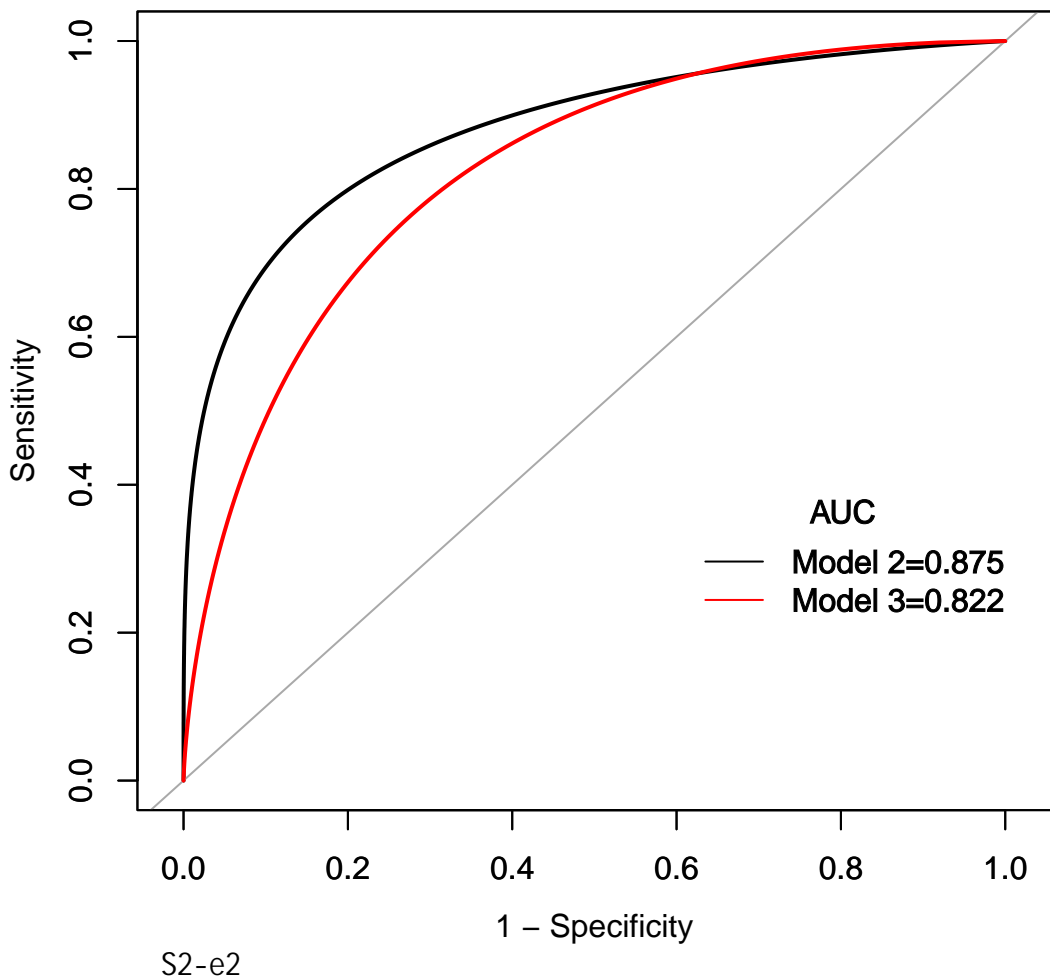

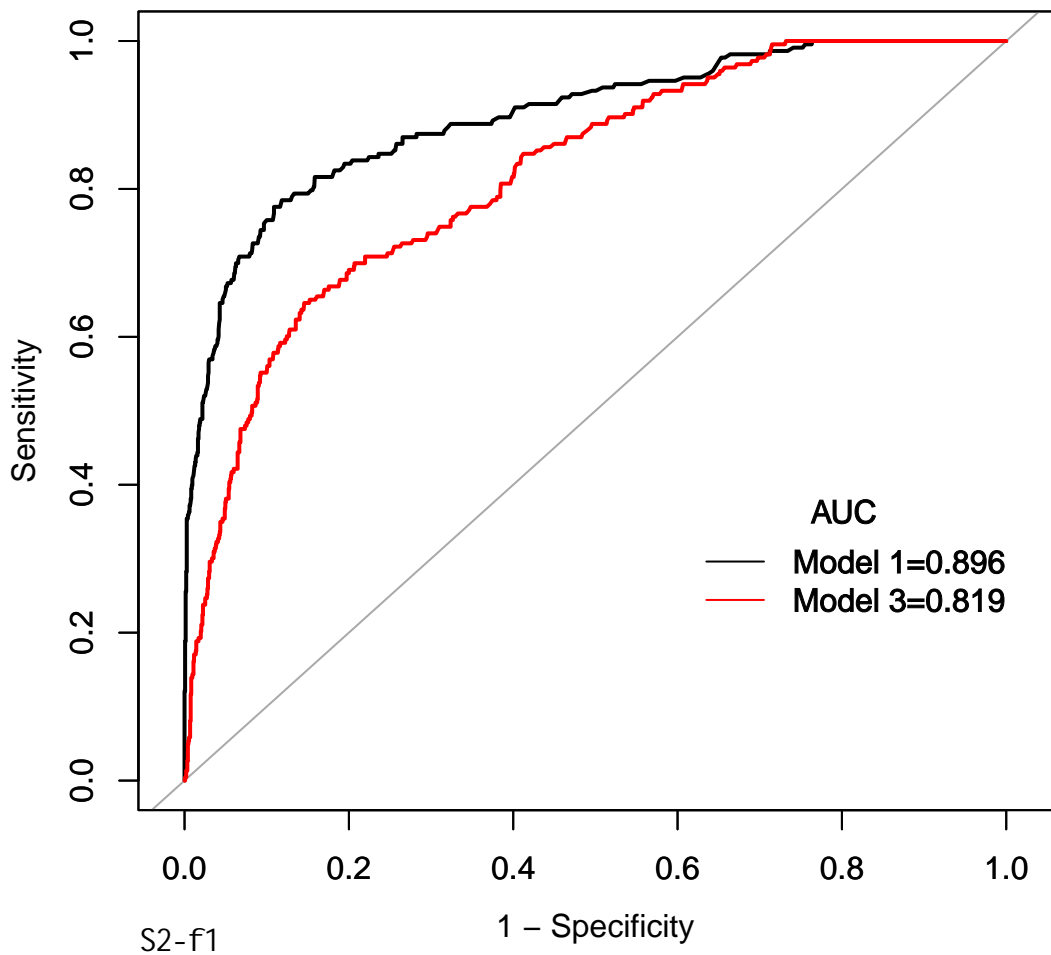

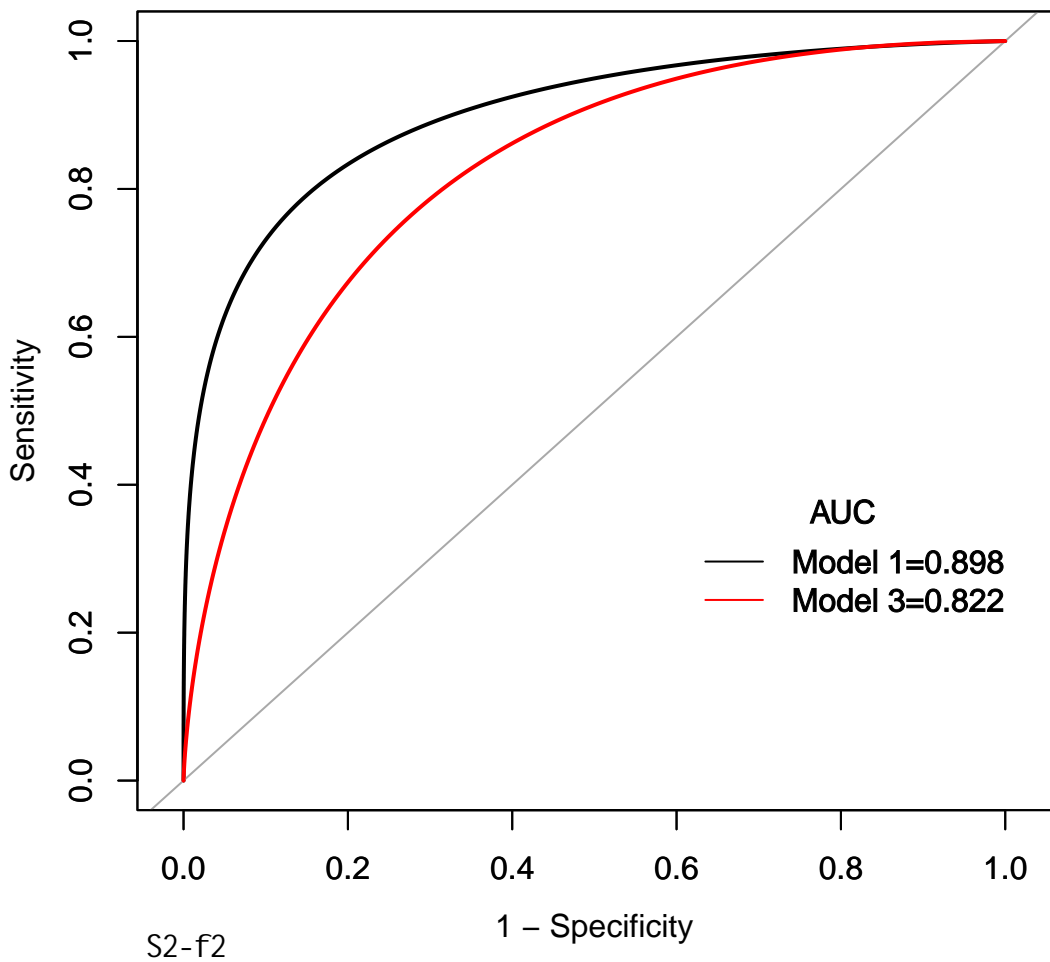

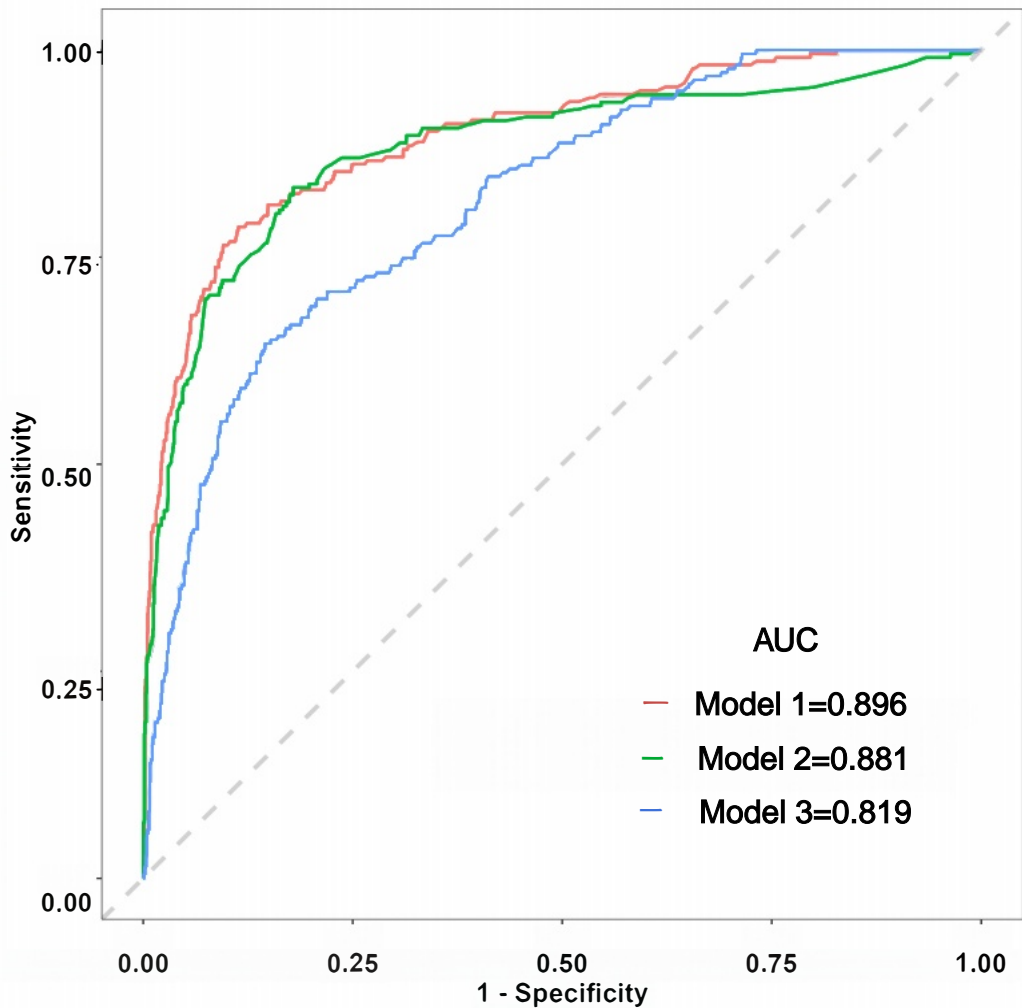

S2-gl

## **Figure legends**

**Figure S2.** The raw and smooth combination ROC curve of MEWS, RDW, and Creatine for the prediction of 7-day mortality in TBI patients with and without the bootstrapping method (resample: 500), with an area under the receiver operating characteristic curve

**Figure S2-a1** The MEWS+RDW raw ROC curve for the prediction 7-day mortality in TBI patients without bootstrapping method ,with an area under the receiver operating characteristic curve (AUROC) of 0.896.

**Figure S2-a2** The MEWS+RDW smooth ROC curve for the prediction 7-day mortality in TBI patients obtained by the bootstrapping method (resample: 500), with an area under the receiver operating characteristic curve (AUROC) of 0.898 (95% CI, 0.88,0.92).

**Figure S2-b1** The MEWS+creatine raw ROC curve for the prediction 7-day mortality in TBI patients without bootstrapping method ,with an area under the receiver operating characteristic curve (AUROC) of 0.881.

**Figure S2-b2** The MEWS+creatine smooth ROC curve for the prediction 7-day mortality in TBI patients obtained by the bootstrapping method (resample: 500), with an area under the receiver operating characteristic curve (AUROC) of 0.875 (95% CI, 0.85,0.90).

**Figure S2-c1** The RDW+creatine raw ROC curve for the prediction 7-day mortality in TBI patients without bootstrapping method ,with an area under the receiver operating characteristic curve (AUROC) of 0.819.

**Figure S2-c2** The RDW+creatine smooth ROC curve for the prediction 7-day mortality in TBI patients obtained by the bootstrapping method (resample: 500), with an area under the receiver operating characteristic curve (AUROC) of 0.822 (95% CI, 0.79,0.85).

**Figure S2-d1** The comparison of raw ROC curves between MEWS+RDW with MEWS+creatine .

**Figure S2-d2** The comparison of smooth ROC curves between MEWS+RDW with MEWS+creatine.

**Figure S2-e1** The comparison of raw ROC curves between MEWS+creatine with RDW+creatine .

**Figure S2-e2** The comparison of smooth ROC curves between MEWS+creatine with RDW+creatine .

**Figure S2-f1** The comparison of raw ROC curves between MEWS+RDW with RDW+creatine.

**Figure S2-f2** The comparison of smooth ROC curves between MEWS+RDW with RDW+creatine.

**Figure S2-g1** The comparison of raw ROC curves between three Models. (Model1:MEWS+RDW,Model2:MEWS+Creatine, Model 3: RDW+Creatine).
